# Supplementary material
Source: publisher figshare collection journal article supplement (https://gsapubs.figshare.com/ndownloader/files/22408476)
Supplement: Supplementary file 1 [file 22408476]

## Sheet: Appendices
Supplemental File 3: Trace element concentrations obtained by Laser Ablation ICP-MS on hornblende (AM) and augite (PX).
	ppm	ppm	ppm	ppm	ppm	ppm	ppm	ppm	ppm	ppm	ppm	ppm	ppm	ppm	ppm	ppm	ppm	ppm	ppm	ppm	ppm	ppm	ppm	ppm	ppm	ppm	ppm	ppm
Sample #	P	Sc	Ti	V	Cr	Mn	Sr	Y	Zr	Ba	La	Ce	Pr	Nd	Sm	Eu	Gd	Tb	Dy	Ho	Er	Tm	Yb	Lu	Hf	Pb	Th	U
Lower zone
30PX11	28.95	137.2	2801	598	848	2057	16.5	30	24.2	5.96	4.11	15.1	2.51	11.37	3.55	0.69	4.82	0.79	5.58	1.23	3.77	0.55	3.16	0.49	1.03	0.41	0.28	0.12
30PX12	12.49	177.8	1166	330	242	2189	10	76.9	30	0.44	8.91	39.48	7.28	35.63	11.53	0.88	13.19	2.22	15.29	3.07	8.92	1.21	7.34	1.08	1.86	0.45	0.31	0.18
30PX21	26.69	142.5	2071	435	1152	2487	13.5	64.5	34	0.12	7.6	27.3	5.17	25.41	8.38	0.89	10.07	1.68	11.55	2.43	7.58	1.09	7.12	1.01	0.9	0.33	0.45	0.3
30PX22	41.43	138.3	3063	464	1660	3004	13.1	77	47.2	43.53	10.63	38.86	7.19	35.42	11.03	1.02	12.38	2.08	14.28	3.06	8.9	1.35	7.85	1.25	1.37	0.51	1.67	0.57
30PX31	16.64	84.1	1307	187	2614	1281	14	13.6	11.9	0.51	2.65	7.39	1.17	5.82	1.87	0.39	2.35	0.37	2.57	0.56	1.68	0.24	1.46	0.25	0.46	0.28	0.2	0.08
30PX32	30.1	148.2	2742	404	1242	1871	16	34.3	21.2	12.12	5.49	17.62	3.04	14.64	4.99	0.81	5.5	0.93	6.62	1.3	4.13	0.6	3.83	0.6	0.92	0.35	0.45	0.18
30PX61	44.41	136	3159	555	727	1652	14.4	26.2	22	1.05	2.58	9.22	1.7	9.72	3.36	0.71	4.5	0.76	5.03	1.04	3.1	0.47	2.64	0.35	0.99	0.28	0.13	0.09
30PX62	44.62	142.7	3487	567	769	1960	15.9	24.7	17.3	0.17	2.4	8.46	1.57	7.98	3.45	0.67	3.99	0.77	5.15	1.01	2.96	0.4	2.62	0.34	0.76	0.3	0.17	0.27
30PX63	41.57	148.4	2654	503	588	1957	16.1	35.5	20.5	bdl	4.34	16.93	2.88	14.78	4.74	0.67	5.62	1.04	6.39	1.44	4.06	0.58	3.89	0.56	0.88	0.38	0.51	0.24
30PX81	24.1	140	2247	475	699	1804	15.1	22.8	15.4	0.43	2.94	9.82	1.66	8.54	3.11	0.55	3.56	0.68	4.3	0.93	2.76	0.42	2.49	0.39	0.64	0.2	0.24	0.05
30PX82	25.77	148.1	2228	491	476	2029	15.5	27.6	16.9	2.83	2.8	10.39	1.93	10.77	3.65	0.57	4.43	0.77	5.57	1.18	3.26	0.41	2.87	0.37	0.69	0.32	0.2	0.05
30PX83	19.15	168.4	2256	516	445	2235	12.2	74	48.2	0.47	9.56	37.41	6.76	34.33	10.66	0.96	12.45	2.23	14.49	2.95	8.63	1.18	7.25	1.1	2.34	0.39	1.02	0.7
30PX91	34.11	94	1162	262	1028	1278	15.6	11.7	8.9	0.14	1.87	5.74	1.04	4.76	1.78	0.36	1.96	0.33	2.18	0.47	1.4	0.2	1.11	0.17	0.29	0.22	0.24	0.07
30PX92	30.75	67.5	724	166	1770	1153	15.9	4.9	2.2	bdl	0.71	2.04	0.33	1.8	0.6	0.18	0.82	0.13	0.88	0.19	0.49	0.09	0.51	0.08	0.12	0.11	0.07	bdl
30PX93	32.85	148.6	1912	331	1141	1825	14.3	54.6	23.9	4.35	8.37	29.82	5.35	26.11	7.58	0.8	8.77	1.45	9.65	1.98	5.98	0.96	6.17	0.89	1.18	0.55	0.56	0.24
351CPX11	32.9	119.1	1710	447	609	2208	17.8	29	18.9	0.97	3.4	13.89	2.44	13.41	4.29	0.67	4.77	0.8	5.71	1.12	3.49	0.47	3.15	0.42	0.64	0.3	0.22	0.05
351AM12	51.9	58.8	1809	288	164	2260	21.9	14.4	33.5	29.33	5.26	16.63	2.31	9.86	2.64	0.71	2.86	0.37	2.72	0.57	1.9	0.27	1.9	0.27	1.26	0.41	0.11	0.06
351AM13	62.6	100.5	7724	640	568	2034	46.3	28.2	45.2	68.59	7.97	27.68	4.17	19.69	5.03	1.34	5.02	0.78	5.26	1.06	3.17	0.47	3.36	0.47	1.76	0.86	0.29	0.09
351AM21	54.4	74.1	2234	302	207	2165	26	20.3	43	30.22	6.23	18.97	2.91	13.58	3.23	0.97	3.67	0.52	3.85	0.77	2.27	0.37	2.3	0.37	1.58	0.39	0.08	0.06
351CPX31	28.9	92	515	306	240	3048	17.9	10.5	16.7	0.6	1.73	6.3	1.07	5.74	1.89	0.33	1.93	0.32	2.13	0.42	1.39	0.18	1.21	0.2	0.59	0.25	0.08	0.02
351AM44	97	119.7	18040	1220	497	2102	105.5	38.4	53.5	193.84	9.65	33.9	5.56	27.58	7.55	2.11	7.4	1.17	7.43	1.52	4.41	0.62	4.19	0.66	1.87	1.83	0.3	0.13
351AM45	54.4	82.8	5216	456	433	2104	35.6	24.7	44.2	60.82	7.8	25.59	3.81	17.15	4.54	1.29	4.51	0.67	4.83	0.94	2.93	0.41	2.85	0.44	1.58	0.7	0.27	0.08
351AM51	42.7	102.8	2343	407	1099	2324	13.2	17.1	22.2	6.69	3.7	11.78	1.84	9.03	2.67	0.6	2.91	0.48	3.48	0.68	2.09	0.29	2.04	0.3	0.88	0.26	0.11	bdl
351AM52	61.6	119.4	7895	658	502	2127	47.9	29.7	51.7	87.31	8.79	28.98	4.41	21.73	5.36	1.51	5.37	0.87	5.7	1.18	3.54	0.53	3.52	0.51	2.05	0.93	0.3	0.08
351AM63	45	48.5	2333	231	172	2287	22.3	16	38.1	28.15	5.89	18.37	2.64	11.65	2.87	0.9	2.9	0.46	3.02	0.61	1.99	0.26	2.06	0.33	1.23	0.46	0.28	0.11
351AM71	119.9	118.5	23493	1086	487	2128	137.3	40.3	47.5	192	8.62	30.94	5.34	28.42	7.42	2.19	7.7	1.2	7.87	1.52	4.73	0.65	4.32	0.63	1.82	2.1	0.25	0.18
351AM72	50.1	71.2	2493	324	200	2058	24.6	18.6	40.4	27.75	5.94	19.17	2.86	12.83	3.28	0.89	3.42	0.47	3.4	0.69	2.22	0.31	2.21	0.32	1.36	0.4	0.1	0.05
351AM91	72.1	158.6	9171	755	325	2067	53.5	35.3	57.1	92.23	9.28	29.49	4.65	22.54	5.74	1.49	6.28	0.96	6.55	1.36	4.15	0.63	4.17	0.62	2.07	1.02	0.27	0.08
351AM92	81.9	85.8	10447	522	358	2279	56.9	28.7	49.2	92.18	8.89	28.46	4.43	21.98	5.17	1.55	5.35	0.79	5.2	1.09	3.53	0.49	3.3	0.5	1.85	0.97	0.29	0.11
351AM101	111.2	103.4	23220	1032	476	1898	136.8	35	41.8	190.62	7.28	28.74	4.9	25.2	6.72	1.92	7.22	1.06	6.8	1.38	4.08	0.55	3.79	0.53	1.62	1.8	0.12	0.11
351AM102	51.2	83	2999	405	361	1813	20.1	17.9	33.2	26.57	5.31	17.74	2.56	11.14	2.83	0.76	3.04	0.49	3.34	0.69	2.05	0.3	2.33	0.33	1.13	0.43	0.17	0.07
351CPX103	27.2	106.7	2158	522	553	2055	20.3	11.4	17.7	3.21	1.55	6.31	1.15	6.22	1.9	0.29	2.18	0.37	2.41	0.47	1.35	0.19	1.19	0.21	0.8	0.24	0.22	0.03
5209PX11	36.5	100.1	1650	383	4585	1334	19.8	6.7	5.3	0.53	0.67	2.76	0.57	3.27	1.14	0.36	1.62	0.2	1.43	0.29	0.82	0.12	0.64	0.09	0.21	0.09	bdl	bdl
5209PX12	40.6	89.1	1447	390	1072	1470	21.6	6.8	5.2	2.52	0.83	2.84	0.54	3.22	1.15	0.38	1.26	0.21	1.34	0.28	0.83	0.11	0.68	0.09	0.27	0.09	0.04	bdl
5209PX13	26.6	67.6	1329	305	843	1422	11.6	9.1	6.2	7.44	1.59	5.25	0.91	4.72	1.55	0.37	1.74	0.27	1.78	0.34	1.01	0.15	0.99	0.16	0.24	0.18	0.42	0.08
5209PX14	38.2	73.6	1204	295	895	1709	12.7	8.6	11.4	17.51	2.06	6.41	1.08	5.45	1.48	0.39	1.68	0.25	1.88	0.34	0.99	0.14	1	0.15	0.43	0.18	0.89	0.14
5209PX21	35.2	99	1360	355	1301	1798	15.9	6.7	4.8	0.13	0.71	2.6	0.5	2.96	1.06	0.34	1.21	0.24	1.32	0.26	0.79	0.11	0.68	0.09	0.23	0.13	0.04	0.02
5209PX22	64.3	121.5	2494	587	1466	2877	18.8	14.6	12.5	21.14	2.72	8.89	1.49	7.78	2.12	0.56	2.49	0.47	2.9	0.54	1.86	0.23	1.58	0.27	0.46	0.27	1.44	0.27
5209PX22-2	23.1	123.7	1123	476	276	2084	14.5	19.6	13.8	0.71	2.25	9.11	1.83	10.82	3.63	0.64	4.34	0.69	4.14	0.8	2.3	0.33	2	0.3	0.57	0.34	0.23	0.05
5209PX23	35.5	123.7	1953	488	1653	1544	19.6	10	7.5	bdl	0.86	3.39	0.71	4.43	1.76	0.49	1.97	0.31	2.02	0.4	1.19	0.14	1	0.15	0.44	0.05	bdl	bdl
5209PX24	32	102.6	1507	387	1741	1805	17.1	7.6	5.2	bdl	0.81	2.78	0.58	3.32	1.3	0.4	1.42	0.24	1.62	0.33	0.93	0.13	0.75	0.11	0.33	0.08	0.03	bdl
5209PX25	40.4	116.3	2174	545	1584	1815	17.2	11.5	8.5	0.44	1.11	3.88	0.77	4.82	1.74	0.46	2.13	0.34	2.39	0.46	1.3	0.19	1.18	0.17	0.46	0.15	0.03	0.02
5209PX25-2	39.7	114.7	2011	534	1105	2139	16.8	15	15.3	11.37	2.73	9.38	1.68	8.45	2.8	0.56	3.04	0.45	3.19	0.62	1.66	0.26	1.61	0.25	0.58	0.27	0.65	0.11
5209PX26	50.4	133.7	2429	556	1536	2654	20.1	14.9	10.6	12.53	2.75	7.82	1.32	6.66	2.31	0.61	2.71	0.45	2.9	0.62	1.69	0.25	1.55	0.22	0.4	0.33	1.22	0.19
5209AM34	55.4	117.8	11902	1205	418	1658	44.8	58	53.3	149.29	14.32	53.4	8.83	43.74	11.93	2.56	12.11	1.8	11.41	2.29	6.67	0.94	6.03	0.86	2.22	1.11	0.42	0.19
5209PX41	32.5	81.2	1546	393	1004	1580	13.1	8.5	5.2	2.29	0.9	2.77	0.55	3.28	1.16	0.37	1.5	0.25	1.69	0.35	0.96	0.13	0.83	0.13	0.21	0.16	0.03	0.09
5209PX41-2	42.2	94.5	1829	425	1443	2500	14	14.1	18.3	14.58	3.13	10.06	1.7	8.86	2.74	0.56	2.96	0.47	2.93	0.61	1.63	0.23	1.62	0.24	0.65	0.26	1.04	0.1
5209PX71	32	74.8	1147	309	5995	1429	19.4	5.6	3.3	0.49	0.87	2.99	0.5	2.76	0.91	0.28	1.08	0.18	0.99	0.22	0.66	0.08	0.53	0.07	0.15	0.16	0.09	0.03
5209PX72	36.4	124.8	2498	669	1436	2271	18.1	12.6	9.2	0.87	1.4	4.89	0.91	5.31	1.84	0.57	2.26	0.4	2.54	0.54	1.51	0.19	1.32	0.21	0.47	0.16	0.23	0.07
5209PX73	43.8	102.5	2122	534	1217	2534	15.1	11.4	11.7	15.26	2.64	8.22	1.23	6.26	1.91	0.49	2.12	0.36	2.29	0.45	1.27	0.19	1.26	0.17	0.38	0.29	0.91	0.09
5209AM84-2	55.4	72.4	4452	339	139	1719	23.8	18.4	52.4	93.7	9.3	28.64	3.7	15.89	3.85	1.4	3.39	0.54	3.26	0.68	2.06	0.33	2.66	0.39	1.43	0.62	0.42	0.14
5209PX92	40.9	126.4	2470	594	2695	2146	15.2	10.9	10	1.19	1.88	5.36	0.85	4.48	1.66	0.5	2.15	0.34	2.27	0.48	1.33	0.17	1.17	0.2	0.59	0.21	0.83	0.12
5209PX92-2	42.3	130.9	2757	615	1600	2138	14.7	12	10.9	0.58	1.56	4.95	0.88	4.86	1.7	0.51	2.49	0.37	2.38	0.48	1.49	0.2	1.23	0.19	0.57	0.2	0.35	0.15
5209PX93	51.8	123.5	2616	564	1010	2456	19.6	23.7	27.3	33.61	3.99	14.54	2.7	14.17	4.34	0.78	4.79	0.77	4.73	0.88	2.87	0.39	2.37	0.35	1.09	0.35	0.96	0.15
5209AM94	72.1	141.2	16866	1043	339	1535	68.8	102.8	121.9	304.33	24.77	92	15.74	82.05	23.91	3.34	23.34	3.31	20.93	4.07	11.63	1.51	9.68	1.13	4.72	1.56	0.87	0.39
128ACPX21	38.6	92.4	2011	350	774	2013	18.9	17.8	10.6	14.59	4.45	17.15	2.69	12.38	3.2	0.52	3.6	0.52	3.66	0.63	2.09	0.29	1.88	0.31	0.41	0.3	0.3	0.04
128ACPX22	42.3	100.6	2287	365	854	2362	18.9	20.5	13.8	14.92	4.77	17.68	2.95	14.04	3.98	0.55	4.18	0.65	3.93	0.79	2.41	0.32	2.28	0.32	0.55	0.32	0.34	0.06
128ACPX23	42.1	98.6	2046	359	841	2094	19.2	20.5	12.6	14.1	4.7	17.48	2.93	13.87	3.64	0.51	3.67	0.58	3.93	0.82	2.39	0.27	2.42	0.3	0.43	0.33	0.32	0.07
128ACPX11	34.7	107.9	2843	397	1532	2102	23	15.9	11.1	8.25	3.89	12.4	1.8	7.5	2.65	0.61	3.05	0.54	3.29	0.69	1.74	0.27	1.7	0.28	0.4	0.34	0.62	0.19
128ACPX12	41.1	115.6	2251	439	1405	3185	18.5	23.1	12.6	21.05	5.3	17.88	2.77	13.03	4.04	0.49	4.3	0.7	4.49	0.9	2.55	0.4	2.45	0.34	0.53	0.42	1.26	0.27
128ACPX11	31.1	110	2182	403	1201	3539	18.2	13.5	9.3	6.59	3.47	10.79	1.6	7.08	2.13	0.51	2.57	0.42	2.59	0.52	1.64	0.25	1.63	0.21	0.47	0.36	1.66	0.34
128AAM13	28.8	111.7	3006	505	1071	2148	11.7	22.7	12.1	2.8	5.35	18.59	2.83	13.74	3.85	0.53	4.53	0.64	4.61	0.88	2.57	0.38	2.5	0.35	0.61	0.32	0.15	0.08
128AAM14	42.4	118.6	9929	704	697	2343	34.7	53.1	34.2	70.57	16.11	63.18	10.3	48.54	11.14	1.34	10.88	1.59	9.75	1.98	5.96	0.83	5.71	0.83	1.74	0.76	0.29	0.19
128ACPX51	39.9	125.4	2981	499	1725	2294	22.1	21	13.9	19.58	5.12	18.99	2.99	14.04	3.76	0.6	4	0.64	4.15	0.78	2.47	0.33	2.33	0.33	0.67	0.45	0.51	0.08
128ACPX52	27.6	111.3	2088	393	1603	2289	20.5	25.7	12.7	16.13	4.88	19.02	3.28	16.43	4.47	0.53	4.89	0.76	5.07	1.05	2.92	0.45	2.66	0.4	0.47	0.33	0.35	0.07
128AAM53	38.3	233.7	11762	2184	2023	1440	42.2	104.9	40.2	108.34	16.83	71.81	12.76	67.59	20.61	1.54	22.82	3.28	21.09	4.18	11.97	1.53	9.43	1.19	2.18	0.86	0.26	0.15
128ACPX31	44.1	112.2	2232	382	1021	2294	17.7	12.7	9.3	4.63	3.38	10.98	1.64	7.17	2.06	0.49	2.53	0.38	2.66	0.56	1.62	0.23	1.15	0.19	0.48	0.31	0.63	0.1
128CPX32	47.1	120.6	2901	401	1737	2383	25.1	21.5	12.7	25.49	5.1	16.94	2.78	13.07	3.86	0.6	4.04	0.65	4.43	0.88	2.49	0.4	2.43	0.32	0.49	0.37	0.61	0.11
128AM33	40	101.8	5156	434	956	1960	16.3	30.5	20.5	31.67	7.2	24.79	3.93	20.25	5.79	0.85	5.79	0.9	6.22	1.21	3.72	0.53	3.46	0.48	1.03	0.39	0.15	0.04
128CPX41	26.1	103.3	2664	380	2145	1992	21.5	20.6	12.8	12.05	4.07	16.61	2.83	12.98	3.65	0.59	4.29	0.56	4.16	0.76	2.26	0.36	2.3	0.32	0.55	0.35	0.37	0.07
128AM42	43.5	154.9	10358	1392	836	1952	37.6	48.6	37.6	49.56	14.55	54.6	8.21	38.27	9.77	1.47	9.56	1.46	9.38	1.91	5.52	0.79	5.33	0.78	1.6	0.95	0.36	0.15
6809CPX12	26	80.8	906	212	189	2873	18.3	13.6	16.8	bdl	3.9	13.3	2.19	10.21	2.63	0.54	2.65	0.44	2.61	0.57	1.59	0.24	1.65	0.29	0.76	0.45	0.18	0.05
6809AM13	53.2	99.9	10762	562	204	2126	43	36.8	38	127.77	20.21	60.79	8.55	36.23	8.38	1.9	7.8	1.1	6.98	1.4	4.29	0.61	4.1	0.6	1.88	1.83	0.88	0.23
6809AM14	49	83.3	9370	532	204	2141	41.4	39.9	45.3	142.91	21.49	66.02	9.38	39.9	9.55	2.16	9.13	1.33	7.93	1.54	4.28	0.64	4.21	0.61	2.14	1.84	0.96	0.27
6809CPX21-2	40.1	147	3060	630	798	2558	23.5	36	27.7	9.59	5.96	21.91	3.76	20.9	6.4	1.23	7.44	1.19	7.29	1.45	3.99	0.59	3.56	0.48	1.27	0.66	0.73	0.15
6809CPX21	23.3	74.6	886	206	286	3131	16.5	12.7	16.7	0.06	4.38	15.22	2.32	10.24	2.56	0.55	2.58	0.38	2.51	0.5	1.53	0.23	1.81	0.28	0.85	0.41	0.2	0.06
6809AM22	47.6	108.4	4629	373	381	2284	25.6	29	39.9	51.06	16.43	51.69	6.93	28.69	6.67	1.72	5.83	0.81	5.51	1.12	3.45	0.52	3.65	0.52	1.45	1.13	0.59	0.16
6809CPX52-2	40	139.6	2708	419	428	2192	20.3	34.6	25.6	0.64	5.9	18.24	3.33	18.21	5.76	1.06	6.41	1.03	6.83	1.37	4.1	0.55	3.68	0.57	1.19	0.39	0.27	0.06
6809CPX52-3	40.3	117.9	2583	335	1163	2343	20.3	40.6	27.1	9.26	6.9	23.21	4.37	23.89	6.87	1.19	7.48	1.19	7.97	1.57	4.64	0.67	4.28	0.65	0.78	0.43	0.53	0.08
6809CPX52-4	33.1	123.7	1010	224	237	2498	15.3	38.7	23.8	bdl	5.85	20.34	4.03	22.43	7.18	0.96	7.8	1.19	7.7	1.55	4.51	0.64	4.15	0.6	1.15	0.43	0.19	0.04
6809AM53	52.2	119	5834	428	280	2223	28.3	48.8	54.3	53.68	22.44	59.54	9.13	40.88	10.5	2.08	9.96	1.43	9.2	1.77	5.54	0.79	5.5	0.83	2.65	1.16	0.88	0.16
6809AM55	52.5	75.9	6110	330	167	2191	31.1	35.1	48.2	53.41	19.2	52.76	7.9	34.23	7.5	1.95	6.8	1.02	6.39	1.34	3.87	0.59	4.33	0.65	2.06	1.14	0.77	0.23
6809CPX62	33.7	106.5	910	230	436	2342	15.6	21.6	23.3	bdl	5.3	16.28	2.86	14	3.8	0.68	3.94	0.65	3.95	0.85	2.62	0.39	2.52	0.39	1.03	0.43	0.22	0.05
6809CPX62-2	37	109.6	1348	268	471	2649	16.7	21	23.8	0.11	4.78	14.57	2.61	13.21	3.86	0.68	4.34	0.67	4.25	0.85	2.54	0.37	2.33	0.34	1.25	0.4	0.24	0.06
6809AM63	59.5	112	11883	568	552	1987	51	44	49.6	159.85	22.46	57.62	8.43	38.05	8.85	2.06	9.12	1.34	8.13	1.72	5.14	0.69	4.96	0.72	1.78	1.85	1.02	0.24
6809AM66	55.1	97.7	11364	547	244	1901	52	51.7	58.5	133.03	22.02	61.54	9.84	46.24	11.53	2.08	11.75	1.6	10.08	1.95	5.53	0.78	4.97	0.73	3.02	1.77	1	0.26
6809CPX76	45.4	131.7	3094	572	917	2153	24.3	21.6	17.9	0.66	3.94	13.44	2.22	12.28	4.17	0.83	4.45	0.7	4.45	0.89	2.46	0.37	2.11	0.28	0.79	0.41	0.3	0.1
6809CPX77	37.6	155.2	1364	372	219	2920	14.8	54.2	30.2	2.24	6.26	27.07	5.55	30.17	9.95	1.09	11.33	1.75	11.42	2.22	5.88	0.82	5.02	0.75	1.63	0.45	0.22	0.04
6809AM713	48.3	126.6	10737	743	360	2080	46.1	97.2	53.5	99.6	31.12	118.31	19.22	93.04	22.28	3.48	21.85	3.02	18.6	3.63	10.13	1.47	9.26	1.26	3.27	2.12	0.62	0.19
6809CPX78	27	105.8	1093	379	317	2365	16.1	21.5	17.6	0.17	4.05	14.84	2.55	12.76	3.8	0.67	4.25	0.65	4.37	0.89	2.55	0.35	2.61	0.36	0.77	0.34	0.14	0.03
133CPX1101 no exsolution	31.5	66	723	153	1529	1155	18.6	4.7	10.3	0.12	1.25	3.6	0.59	2.9	0.93	0.24	0.99	0.14	0.96	0.19	0.53	0.07	0.46	0.06	0.38	0.25	0.07	0.03
133CPX1102 exsolution rich	32.4	77.9	1018	164	2069	987	25.6	4.6	7.1	7.33	1.15	2.85	0.5	2.76	0.79	0.24	0.94	0.14	0.99	0.2	0.53	0.07	0.41	0.05	0.3	0.33	0.22	0.03
133CPX1103 exsolution rich	31.9	79.2	939	158	2415	956	25	4.2	3.2	2.63	0.92	2.24	0.45	1.93	0.77	0.26	0.88	0.14	0.87	0.22	0.56	0.07	0.4	0.05	bdl	0.21	0.21	0.05
133CPX1104 no exsolution	27.9	60	655	105	3910	811	22	2.3	0.8	0.33	0.24	0.86	0.18	1.14	0.34	0.15	0.46	0.07	0.45	0.09	0.31	bdl	0.15	bdl	bdl	0.06	bdl	bdl
133CPX1105 no exsolution	31.5	80.9	1098	191	3814	997	23.6	4.3	2.5	bdl	0.42	1.61	0.34	2.08	0.74	0.23	0.96	0.14	0.92	0.18	0.5	0.07	0.39	0.05	0.08	0.05	bdl	0.03
133CPX11 no exsolution	45	52.1	585	121	4514	878	20.1	2.1	0.8	bdl	0.43	1.18	0.19	1.05	0.41	0.11	0.44	0.06	0.45	0.1	0.19	0.03	0.18	0.03	0.08	0.11	0.08	0.03
133CPX11-2 amph exsolution?	56.7	127.7	2586	492	812	2058	23.8	12.6	10	3.31	1.4	4.63	0.93	5.38	2.11	0.55	2.51	0.43	2.72	0.52	1.48	0.18	1.11	0.16	0.55	0.19	0.24	0.1
133CPX12	49.4	123	1910	380	460	1820	20	9.9	6.7	bdl	1.22	3.96	0.74	4.29	1.57	0.52	2.16	0.35	2.03	0.41	1.15	0.15	0.86	0.14	0.31	0.16	0.14	0.14
133CPX13 esolution rich area but no exsolution where the spot was placed	47.2	121.5	1618	464	357	1916	17.2	18.5	27.5	2.81	2.86	11.14	2.16	10.98	3.62	0.88	3.84	0.55	3.93	0.75	2.22	0.29	1.91	0.28	1.3	0.23	0.28	0.05
133AM14	74.8	139.6	14025	1164	381	1110	65.7	74.5	75.2	318.89	15.86	59.02	10.85	57.63	16.9	3.19	18.06	2.43	15.58	2.94	8.07	1.03	6.35	0.87	3.48	1.4	0.79	0.24
133PX63	51.4	102.2	1891	391	774	1905	18.4	10.1	8.2	0.14	1.93	6.9	1.16	5.56	1.86	0.53	1.98	0.31	1.99	0.46	1.21	0.18	1.03	0.18	0.25	0.23	0.82	0.16
133PX61	35.4	47	542	94	5061	954	20.8	2	1	0.15	0.5	1.46	0.2	1.14	0.41	0.13	0.41	0.06	0.45	0.1	0.26	0.03	0.26	0.02	bdl	0.15	0.1	0.06
133PX62	49.5	136	2797	563	1019	1701	23.6	12.8	11	0.27	1.54	5.2	0.99	6.15	2.24	0.63	2.94	0.44	2.64	0.56	1.52	0.22	1.24	0.17	0.58	0.24	0.23	0.2
133PX41	28.9	74.6	922	174	2011	1196	19.5	4.1	1.6	bdl	0.31	1.36	0.31	1.96	0.62	0.25	0.88	0.13	0.91	0.17	0.52	0.06	0.38	0.06	0.07	bdl	bdl	bdl
133PX41-2	21.9	84.8	1025	201	2613	1152	21.6	5.1	2.6	bdl	0.75	2.22	0.44	2.36	0.95	0.26	1.1	0.16	0.93	0.18	0.56	0.07	0.43	0.07	0.19	0.1	0.2	0.05
133PX42	36.5	124.6	2266	453	1223	2155	18.4	14.3	11.7	1.56	3.02	11.08	1.86	8.39	2.45	0.71	2.96	0.45	2.77	0.61	1.8	0.24	1.68	0.23	0.41	0.28	0.91	0.12
133PX1303	44.8	71.4	901	174	2594	1490	20.1	5.9	2.7	bdl	1.6	5.29	0.81	3.55	1.09	0.29	1.28	0.18	1.21	0.25	0.65	0.1	0.72	0.11	0.09	0.18	0.5	0.08
133PX1304	54.2	131.1	2319	445	1297	2076	16.2	20.2	31.3	2.05	3.68	12.84	2.29	11.29	3.2	1.02	3.71	0.58	3.79	0.8	2.45	0.37	2.31	0.35	0.65	0.29	0.98	0.12
184APX31	17.3	102.6	529	212	519	1467	14.7	46.8	12.8	bdl	7.54	35.46	6.41	32.68	9.66	1.19	8.84	1.48	9.43	1.72	4.97	0.68	4.34	0.62	0.84	0.37	0.08	bdl
184APX32	15.5	98.1	519	200	830	1430	14.9	48.6	13.7	bdl	8.32	39.14	7.09	35.96	10.28	1.14	9.91	1.47	9.18	1.81	5.24	0.66	4.38	0.67	0.96	0.4	0.09	0.03
184APX33	17.7	140.9	1232	352	1513	1438	16.1	39	26.1	bdl	6.41	31.27	5.75	30.24	9.11	1.55	9.52	1.31	8.06	1.57	4.16	0.59	3.37	0.49	1.5	0.38	0.1	0.06
184APX34	15	84.4	166	141	378	1532	14.3	24.4	15.2	bdl	8	30.13	4.76	21.58	5.29	0.83	4.87	0.79	4.98	0.92	2.7	0.37	2.35	0.4	0.91	0.65	0.95	0.51
184APX35	63	108.1	558	235	876	1595	16	44.5	14	bdl	7.67	35.67	6.14	31	9.19	1.07	9.03	1.38	8.58	1.64	4.9	0.65	3.85	0.56	0.91	0.41	0.16	0.14
184APX25	33.7	76.8	809	163	718	1584	26.5	20.3	24	bdl	5.84	23.17	3.75	17.8	4.67	1.02	4.53	0.73	4.4	0.79	2.2	0.29	1.97	0.28	1.03	0.4	0.34	0.13
184APX26	33.3	105.3	632	235	949	1494	16.9	40.1	15.1	bdl	7.26	32.79	5.72	28.21	8.81	1.09	8.86	1.31	8.03	1.5	4.58	0.58	3.47	0.51	1.02	0.43	0.13	0.11
184APX27	34	79.6	344	147	563	1616	16.9	18	12.1	bdl	7.02	26.34	3.86	17.01	3.89	0.8	3.59	0.53	3.59	0.7	2.11	0.31	2.18	0.36	0.66	0.47	0.19	0.1
184APX28	32.1	85.3	584	176	679	1527	18.5	36.1	16.2	bdl	7.52	32.64	5.66	28.05	7.34	1.01	7.94	1.11	7.02	1.37	3.88	0.6	3.59	0.5	0.95	0.38	0.25	0.17
184APX61	18.4	53.2	581	118	527	1667	31.5	9.8	16.7	bdl	3.37	13.5	2.13	10.01	2.52	0.71	2.41	0.34	1.99	0.33	0.98	0.16	1.1	0.17	0.59	0.2	0.08	0.03
184APX62	16.8	90.6	864	187	891	1511	19.2	19.6	34.2	bdl	5.1	20.15	3.63	17.18	4.76	1.21	4.92	0.7	4.25	0.77	2.19	0.27	1.86	0.27	1.48	0.22	0.17	0.08
184APX63	18.6	118.3	936	286	1173	1349	15.4	36.8	20	bdl	6.53	29.92	5.62	28.06	8.36	1.44	8.47	1.17	7.31	1.41	3.99	0.48	3.14	0.41	1.17	0.34	0.06	0.03
184APX71	20.8	86.7	700	178	713	1458	21.3	43.7	19	bdl	8.01	33.52	6.38	30.9	8.33	1.23	8.97	1.33	7.97	1.58	4.71	0.69	4.12	0.66	0.78	0.4	0.26	0.2
184APX72	17.8	98.1	649	205	677	1530	17.6	41.7	17.3	6.52	7.6	30.83	5.75	28.44	7.96	1.04	7.82	1.25	7.75	1.54	4.54	0.55	3.65	0.59	1.01	0.42	0.33	0.21
184APX73	26	124.1	2490	383	1879	1613	23.4	65.9	34.2	4.12	13.28	48.77	8.74	40.77	11.89	1.87	13	1.86	12.38	2.4	7.01	1	6.39	0.85	1.96	0.81	0.8	0.51
184APX74	20.7	86.4	386	171	648	1530	14.2	26.2	11.7	4.58	7.36	28.67	4.81	21.9	5.59	0.83	4.84	0.8	4.54	0.99	2.81	0.41	2.61	0.42	0.75	0.48	0.49	0.1
184APX75	18.7	109.3	478	209	764	1407	15.2	47	14.3	4.42	7.76	33.32	6.27	31.75	9.1	1.1	9.05	1.35	8.92	1.71	5.24	0.72	4.4	0.58	1.09	0.56	0.45	0.17
184APX76	15.7	110.5	485	202	705	1369	14.1	46	13.6	bdl	7.51	32.34	6.21	30.82	8.7	1.17	9.12	1.42	8.98	1.72	5.29	0.64	4.19	0.63	0.93	0.38	0.15	0.08
184APX81	46.1	109.5	1351	286	1237	1422	24.9	10	8.2	3.7	2.93	8.97	1.37	6.26	1.67	0.52	2.14	0.33	2.21	0.44	1.28	0.1	0.99	0.14	0.27	0.22	0.17	0.09
184APX82	59.7	125.4	2242	332	704	1738	29.6	21.6	20.3	47.93	4.11	14.04	2.47	13.5	3.91	0.76	4.64	0.68	4.19	0.93	2.5	0.3	2.43	0.34	0.82	0.39	0.43	0.14
184APX83	46.1	55.3	555	115	477	1622	26.9	18.2	16.7	bdl	6.36	21.86	3.56	16.03	4.02	0.86	3.54	0.54	3.47	0.64	1.99	0.29	1.9	0.31	0.57	0.47	0.28	0.19
184APX94	28.6	134	1146	399	956	2223	19.9	36.6	23.5	0.76	5.59	21.16	3.97	19.57	6	0.84	6.75	1.05	7.52	1.49	4.43	0.55	3.96	0.52	1.06	0.54	1.02	0.27
184APX95	30	120.8	1006	289	1189	1430	16.5	31.4	22.6	bdl	6.31	26.07	4.86	24.7	7.43	1.28	7.29	1.02	6.88	1.23	3.59	0.4	2.8	0.37	1.19	0.33	0.12	0.09
184APX96	26.3	99.4	581	203	757	1441	15.8	29.9	15.7	bdl	6.92	27.6	4.98	24.7	6.25	1.1	6.4	0.95	6.49	1.18	3.33	0.49	3.02	0.43	0.89	0.48	0.26	0.09
184APX101	18.1	86.7	360	174	545	1654	14.1	23.6	11.1	bdl	7.06	28.33	4.71	21.21	5.06	0.76	4.89	0.72	4.39	0.93	2.63	0.39	2.49	0.33	0.81	0.48	0.28	0.18
184APX102	20.6	117	862	285	1185	1409	16.2	44	18.4	bdl	7.52	32.66	6.07	31.38	8.47	1.25	9.39	1.4	8.86	1.65	4.81	0.66	3.8	0.55	0.99	0.4	0.2	0.13
184APX103	28.6	108.9	1801	353	631	1428	29.7	14.3	17.2	5.96	6.11	20.51	2.81	11.07	2.8	0.8	3.02	0.48	3.14	0.61	1.83	0.2	1.65	0.2	0.65	0.36	0.4	0.27
184APX104	20.9	65	361	124	642	1756	22.5	11.5	12.3	1.3	5.32	19.44	2.71	11.44	2.35	0.62	2.16	0.39	2.29	0.43	1.37	0.2	1.39	0.23	0.6	0.48	0.2	0.11
833AM53	81.8	66.3	8020	450	171	2816	40.3	34.2	44.1	92.44	19	63.88	8.9	36.76	8.33	2.48	7.11	1.05	6.59	1.3	3.71	0.56	3.96	0.56	2.42	1.45	0.25	0.13
833AM52	94.3	220.3	16632	1946	825	1078	53.1	53.3	69.9	190.52	7.42	26.98	4.86	26.55	8.67	1.37	10	1.65	10.34	2.18	5.65	0.7	4.51	0.55	2.8	0.96	0.34	0.16
833PX62	74.9	100.9	9506	667	541	1075	26.1	21.2	44.5	63.3	4.71	17.36	2.65	13.47	3.58	0.78	3.8	0.59	4.01	0.82	2.51	0.33	2.24	0.34	2.01	0.55	0.17	0.08
833AM63	50.5	100.6	1021	458	652	1953	14	6.3	12.2	bdl	0.94	4.22	0.7	3.21	0.87	0.21	1.03	0.19	1.17	0.28	0.78	0.11	0.75	0.08	0.59	0.27	0.07	bdl
833PX43	67.4	114.5	6243	767	912	1113	19.1	17.3	37.8	43.07	3.78	15.76	2.19	10.26	2.66	0.68	3	0.43	3.14	0.66	2.01	0.22	1.94	0.29	1.42	0.54	0.23	0.17
833AM46	51.3	121.3	1234	540	719	1952	14.3	8.2	12.6	0.19	1.15	4.72	0.79	3.8	1.34	0.33	1.8	0.28	1.59	0.36	1.13	0.15	0.74	0.11	0.49	0.25	0.08	bdl
833PX22	70	95.9	3746	533	444	1186	16	13	25.5	23.55	3.15	11.97	1.69	7.93	1.83	0.48	2.1	0.35	2.42	0.5	1.59	0.24	1.51	0.19	0.97	0.29	0.08	0.07
833AM24	26.8	122.4	821	434	478	1926	16	6.5	12.1	7.18	0.99	3.94	0.61	2.92	1.07	0.24	1.34	0.17	1.28	0.25	0.7	0.08	0.69	0.11	0.38	0.31	bdl	0.03
833AM21	43.4	94.3	3305	586	589	1201	13.2	11.9	22.9	17.75	2.69	9.95	1.45	6.39	1.86	0.47	2.02	0.35	2.24	0.46	1.36	0.19	1.34	0.19	0.9	0.3	0.15	0.06
833PX11-2	58.5	121.9	4988	827	906	1234	15.8	17.2	26.8	26.34	3.13	11.27	1.85	8.4	2.23	0.64	2.76	0.49	3.49	0.72	2.09	0.29	1.65	0.26	1.01	0.37	0.12	0.07
833PX11-3	38.1	101.4	767	349	366	1924	14	6	10	0.14	0.95	3.8	0.61	3	0.79	0.24	1.04	0.19	1.22	0.28	0.79	0.1	0.75	0.1	0.31	0.29	0.04	0.05
Pyroxene-rich bloks
132CPX21	43.5	139.9	1820	616	566	2006	15.9	10.3	13.7	1.11	1.26	4.7	0.81	4.42	1.47	0.41	2.05	0.33	2.36	0.44	1.3	0.17	1.14	0.18	0.61	0.27	0.07	0.05
132CPX21-2	35.18	66.88	858.8	161.54	3341.95	1065.18	20.62	5.79	6.55	0.38	2.52	6.84	0.98	4.47	1.04	0.32	1.12	0.19	1.32	0.25	0.72	0.1	0.57	0.09	0.17	0.47	0.68	0.17
132CPX22	32.3	70.99	1084.21	178.54	2287.87	1047.99	19.72	10.68	7.8	0.43	1.87	7.29	1.38	7.42	2.3	0.58	2.43	0.34	2.09	0.45	1.2	0.17	1.17	0.15	0.21	0.45	0.36	0.05
132CPX11-1	32.22	50	984.55	148.51	737.95	1022.09	25.11	12.74	16.72	1	3.36	10.72	1.89	9.38	2.77	0.48	2.6	0.41	2.52	0.53	1.48	0.21	1.29	0.17	0.73	0.6	0.15	0.05
132CPX12-1	37.94	68.54	756.99	141.88	4318.13	994.33	20.21	4.09	2.68	bdl	2.14	5.47	0.73	3.01	0.77	0.22	0.62	0.1	0.8	0.15	0.41	0.06	0.51	0.07	0.07	0.43	0.59	0.11
132CPX32	34.16	64.58	1200.03	165.54	1295.81	1012.09	20.12	13.19	20.47	2.9	3.87	11.67	2.05	9.71	2.71	0.52	3.12	0.47	2.72	0.5	1.52	0.21	1.13	0.17	1.05	0.58	0.19	0.09
132CPX32-2	21.04	91.59	1273.86	254.65	1794.3	1156.29	21.45	7.72	8.38	11.06	2.53	7.18	1.05	5.03	1.25	0.42	1.49	0.23	1.64	0.3	0.85	0.13	0.92	0.13	0.2	0.41	0.32	0.05
132AM34	22.32	73.83	836.33	171.74	2957.69	1189.75	22.52	5.72	5.31	1.56	2.37	6.57	0.92	3.83	1.01	0.3	1.09	0.21	1.1	0.23	0.58	0.1	0.68	0.09	0.12	0.52	0.42	0.08
132AM33	52.45	40.1	6172.01	211.33	806.91	731.99	47.54	14.15	48.79	63.81	11.51	29.8	3.76	15.04	3.06	1.05	2.87	0.43	2.57	0.52	1.63	0.27	1.5	0.26	1.96	1.37	0.27	0.14
132AM35	49.28	54.37	7259.72	275.84	986.21	719.02	44.93	21.52	42.8	64.97	11.06	31.59	4.34	17.86	4.67	1.15	4.49	0.65	4.01	0.77	2.4	0.32	2.37	0.34	1.84	1.57	0.31	0.18
132CPX41	41.25	45.16	3987.99	204.3	1280.91	729.03	31.77	14.43	27.46	37.46	7.21	19.22	2.61	11.55	2.99	0.78	2.96	0.46	2.86	0.6	1.57	0.24	1.62	0.26	1.16	0.7	0.21	0.06
132CPX42	18.36	76.29	1059.06	248.66	3153.93	1239.3	27.64	4.26	3.85	9.26	1.36	3.8	0.51	2.06	0.71	0.23	0.79	0.15	0.99	0.18	0.42	0.08	0.51	0.08	0.21	0.52	0.3	0.09
132CPX43	16.61	59.34	693.73	146.87	4769.72	1211.66	21.99	2.68	1.76	bdl	1.04	2.72	0.35	1.27	0.31	0.15	0.73	0.06	0.55	0.13	0.34	0.05	bdl	0.05	bdl	0.41	0.27	0.09
132CPX92	18.1	78.18	1339.64	261.42	1696	998.78	22.49	9.43	19	0.65	2.64	8.42	1.27	5.82	1.63	0.38	1.83	0.29	1.98	0.35	1.16	0.19	1.08	0.17	0.66	0.77	0.84	0.17
132CPX92-2	26.33	70.48	831.58	157.53	5011.98	1000.41	19.64	3.03	1.39	bdl	0.64	1.47	0.24	1.27	0.5	0.19	0.56	0.1	0.61	0.14	0.32	0.06	0.23	0.04	bdl	0.3	0.19	0.07
132AM94	22.45	70.82	836.55	176.53	2026.82	1120.56	22.06	4.54	4.28	1.55	1.67	4.58	0.64	2.72	0.73	0.3	0.84	0.16	0.78	0.18	0.58	0.08	0.44	0.06	bdl	0.49	0.48	0.1
132CPX51	42.34	49.89	5392.64	236.28	1269.15	681.15	37.43	19.86	33.12	53.44	8.49	24.45	3.4	15.95	3.97	0.86	4.42	0.58	3.64	0.74	2.26	0.31	2.18	0.27	1.42	1.2	0.39	0.17
132CPX52	19.51	54.43	628.83	132.42	4646.44	1099.52	21.74	4.19	5.28	0.8	2.42	7.04	0.99	3.72	0.77	0.31	0.76	0.12	0.83	0.16	0.47	0.06	0.36	0.06	0.09	0.59	0.77	0.14
132CPX52b	20.13	65.04	745.37	152.2	5350.17	1164.1	20.07	3.67	3.4	0.43	1.8	4.4	0.53	2.51	0.79	0.24	0.49	0.12	0.72	0.13	0.36	0.07	0.37	0.07	bdl	0.45	0.62	0.19
132AM53	18.55	65.26	688.23	121.21	3942.74	950.46	20	4.03	3.99	bdl	1.76	4.46	0.64	2.76	0.7	0.24	0.77	0.09	0.89	0.16	0.46	0.07	0.35	0.07	bdl	0.34	0.49	0.14
132CPX61	43.98	58.48	6169.59	295.87	1329.83	747.32	38.49	23.55	34.14	56.79	8.83	26.95	3.86	17.91	4.55	1.03	4.67	0.69	4.48	0.86	2.57	0.34	2.37	0.34	1.37	1.28	0.23	0.16
132CPX62	24.25	66.71	678.86	162.09	4013.65	1202.26	22.7	4.07	4.86	0.84	1.55	4.15	0.55	2.62	0.69	0.29	0.77	0.11	0.91	0.16	0.5	0.07	0.37	0.03	0.11	0.54	0.34	0.07
132CPX63	29.14	92.21	1298.91	255.88	1867.47	1167.03	20.09	8.02	5.72	bdl	2.18	6.39	0.99	4.89	1.53	0.45	1.68	0.24	1.73	0.29	0.91	0.12	0.78	0.11	0.16	0.44	0.87	0.15
132CPX64	29.11	68.12	1938.93	222.96	927.93	944.5	21.8	18.67	25.04	21	2.93	9.26	1.88	10.54	3.7	0.69	4.18	0.62	3.68	0.79	2.22	0.29	1.64	0.27	1.36	0.5	0.32	0.08
100PX11	29.5	89.2	1031	223	2144	1299	23.6	4.5	2.4	0.34	0.65	2.41	0.44	2.57	0.86	0.29	1.13	0.17	0.98	0.21	0.5	0.07	0.26	0.05	0.14	0.12	0.05	0.03
100PX12	29	79.2	1646	241	2549	1321	28.7	7.8	7.4	0.25	1.29	4.96	0.89	5.5	1.9	0.5	1.78	0.27	1.59	0.3	0.82	0.1	0.58	0.06	0.27	0.23	0.09	0.03
100PX13	41.6	81.1	1440	262	2174	1315	33.5	6.5	8.4	22.55	1.55	4.76	0.81	4.17	1.36	0.38	1.43	0.27	1.34	0.3	0.7	0.08	0.67	0.09	0.29	0.29	bdl	bdl
100PX14	32.9	89.9	1452	283	2032	1379	24.2	6.5	4.3	0.2	0.72	2.95	0.57	3.33	1.24	0.41	1.39	0.24	1.31	0.29	0.78	0.1	0.6	0.11	0.19	0.1	0.03	0.02
100PX31	32.9	78.8	1452	236	1590	1299	29.4	8.4	14.8	0.55	2.43	6.69	1.16	6.07	1.8	0.55	1.98	0.28	1.69	0.35	1.04	0.15	0.83	0.13	0.55	1.19	0.12	0.05
100PX32	33.1	92.1	2972	275	1154	1201	29.3	16.5	28.1	0.13	3.01	10.38	2.09	11.77	3.3	0.93	3.95	0.56	3.55	0.61	1.75	0.25	1.37	0.23	1.14	0.2	0.08	0.03
100PX41	11.8	63.1	617	124	3166	923	26.7	2.6	1.9	0.77	0.59	2.09	0.35	1.84	0.57	0.19	0.65	0.07	0.52	0.1	0.35	0.05	0.32	bdl	0.13	bdl	bdl	bdl
100PX42	13.8	46.3	901	144	4503	1045	31.2	3.5	3.3	0.16	0.9	3.06	0.57	2.99	1	0.28	1.19	0.14	0.69	0.13	0.37	0.04	0.45	bdl	0.13	0.15	bdl	0.04
100PX51	12.1	54	559	117	4302	957	30.7	2.7	1.2	bdl	0.62	2.15	0.41	2.34	0.71	0.24	0.72	0.09	0.58	0.11	0.3	0.06	0.2	0.03	bdl	0.08	bdl	0.02
100PX52	19.9	89.1	1456	288	1839	1439	25.1	6.1	4.4	0.88	0.77	3.04	0.53	3.47	1.15	0.37	1.07	0.21	1.42	0.24	0.77	0.09	0.62	0.09	0.22	0.09	0.11	0.03
100PX61	31.5	76.3	1191	215	2407	1311	31.7	5.1	5	5.37	0.99	3.72	0.67	3.77	1.07	0.38	1.19	0.18	1.01	0.2	0.62	0.09	0.52	0.08	0.19	0.13	0.05	bdl
100PX62	28.5	80.8	1381	263	2143	1345	30.9	5.8	5.6	0.12	1.19	4.48	0.74	4.06	1.38	0.42	1.39	0.21	1.23	0.27	0.55	0.09	0.64	0.09	0.24	bdl	0.07	0.06
100AM43	27.6	55.92	2390	270	814	993	38.4	5.5	14	194.12	2.55	6.46	0.93	4.48	1.23	0.53	1.25	0.17	1.22	0.22	0.63	0.1	0.72	0.09	0.49	0.35	0.21	0.08
100AM44	23.2	44.35	1387	177	505	1075	37.3	4.5	8.5	67.51	1.82	4.79	0.75	3.21	0.96	0.42	1.11	0.14	0.95	0.18	0.57	0.07	0.58	0.07	0.34	0.44	0.09	0.04
100AM81	105.1	92.42	11649	697	2550	1026	118.3	16.8	42.8	256.76	6.94	19	2.74	13.6	4.11	1.32	4.14	0.62	3.47	0.67	1.83	0.22	1.45	0.18	1.23	1.03	0.22	0.08
100AM82	31.1	58.98	1530	226	887	1084	27.5	6.6	10.6	42.98	2.88	8.01	1.18	5.22	1.47	0.58	1.51	0.21	1.4	0.26	0.67	0.11	0.78	0.09	0.47	0.3	0.11	0.07
Central zone
777BAM11	59.1667	106.722	10124.4	505.351	182.809	2605.22	53.9196	55.4678	66.377	185.735	15.897	54.8709	9.24164	47.5818	13.0429	2.50514	13.057	1.87338	11.1308	2.13938	6.15087	0.835403	5.6327	0.717599	3.08808	2.32226	0.421212	0.178638
777BAM12	52.7632	87.9469	10774.3	517.703	186.489	2732.03	56.8513	29.9573	52.4017	151.398	11.9051	39.4753	6.1858	29.5177	6.82386	2.05503	6.78535	0.948846	6.01077	1.19958	3.40848	0.496374	3.37276	0.524914	2.16743	0.974877	0.227975	0.10874
777BAM13	66.6068	80.4535	8793.1	524.39	188.064	2904.37	65.5117	27.902	52.5907	101.579	10.5035	33.8045	5.00605	25.0583	6.37919	2.09628	6.38001	0.889211	5.48323	1.1548	3.22741	0.421377	3.23438	0.44449	1.97868	1.22268	0.328821	0.240826
777BAM21	56.0624	151.573	15709.9	636.067	149.492	2242.64	84.2208	92.5069	85.9501	233.467	17.7499	68.2563	12.5697	70.7054	22.3176	3.42823	21.9965	3.19201	19.4624	3.87405	10.3687	1.40325	8.68265	1.13795	3.60961	1.32121	0.224165	0.120294
777BAM22	49.7976	108.024	12679.4	540.269	203.202	2289.14	64.5101	46.2876	69.5797	177.586	14.9803	51.6793	8.62994	43.2287	10.3573	2.50439	10.2583	1.37669	8.73497	1.84402	5.58207	0.744988	4.9643	0.698497	3.20927	1.10259	0.232418	0.0880406
777BAM23	28.5488	75.7246	4921.62	403.011	213.72	2389.04	24.7671	28.4723	25.4895	25.7239	14.2616	43.0952	6.69561	29.3296	7.66374	2.01211	6.65183	0.940246	5.24472	1.16589	3.22406	0.434674	2.84772	0.464012	1.75978	0.771614	0.456196	0.153874
777BAM32	53.0142	121.487	8822.21	843.021	223.965	2633.76	56.42	64.4637	73.9101	221.803	15.0483	54.2676	9.31556	49.3496	15.1479	2.8992	15.4007	2.24185	13.4247	2.63712	7.52148	0.910504	5.6961	0.727651	3.37059	1.31493	0.335381	0.117986
777BAM33	61.5483	72.3637	5676.24	440.171	138.143	3178.41	39.5213	25.5413	35.455	57.7039	12.4432	38.5413	5.54612	25.6205	5.99876	1.68269	5.48257	0.797306	5.03988	0.936507	2.68194	0.466451	2.91054	0.439838	1.8998	1.22112	0.382517	0.162261
777BAM41	53.2183	78.619	9540.07	578.353	340.232	3313.41	62.5683	29.2386	50.7397	95.0644	10.0227	33.8718	5.16388	25.5605	6.66049	1.92074	6.5221	0.902435	5.81428	1.12331	3.25045	0.495105	3.13218	0.415205	1.92827	1.2453	0.276231	0.136404
777bAM42	88.0462	68.7089	4906.43	409.078	156.186	3098.87	33.7365	22.4478	33.8789	34.9819	10.5312	33.5927	4.7497	21.0532	4.96432	1.65867	5.48211	0.679103	4.06093	0.830114	2.41517	0.360622	2.5879	0.383698	1.62851	0.930191	0.262512	0.208312
777BAM43	42.019	71.9206	9302.14	483.78	530.856	2839.16	40.5636	20.0824	46.2295	129.307	13.2266	39.5518	5.44288	23.3244	4.73036	1.64961	4.20038	0.639647	3.63225	0.790214	2.32183	0.328549	2.42552	0.408404	1.78195	1.00196	0.463309	0.173341
777BAM44	53.4831	108.301	10900.8	569.146	147.197	3135	57.4995	44.4513	54.1027	99.1683	11.5425	40.3707	6.38696	31.1665	9.61379	2.14815	10.0272	1.51026	9.06441	1.79532	4.97542	0.658822	4.61119	0.613392	2.24976	1.27023	0.349748	0.213286
777BAM45	46.013	73.3695	6282.04	453.173	186.451	3265.24	34.0298	22.8701	39.9331	37.2768	11.2816	35.3065	4.94446	21.5981	5.55555	1.58687	4.9732	0.673778	4.38209	0.871588	2.50656	0.391777	2.50837	0.365588	1.77165	0.916938	0.360664	0.199581
777BAM52	45.6873	103.547	11986.7	561.893	212.144	2674.3	53.7322	47.8423	66.5249	172.122	13.5713	46.4045	7.77216	39.1477	10.9291	2.22433	10.8957	1.48248	9.21168	1.7997	5.36437	0.785396	4.99345	0.675807	2.94205	1.18885	0.321687	0.111744
777BAM53	49.7681	73.9663	5962.36	434.126	191.064	2593.25	39.0505	26.9134	38.2683	79.9494	12.6027	37.4826	5.73075	24.7029	6.00561	1.81682	5.62699	0.809957	4.95874	1.03142	3.0296	0.455737	2.95246	0.437036	1.7935	0.905187	0.488165	0.185971
777BAM61	55.5	164.03	14678.2	626.53	117.03	2557.54	78.5	88.65	73.35	208.19	15.36	60.92	11.37	61.45	19.97	3.18	21.92	3.18	19.11	3.65	9.62	1.27	7.56	0.89	3.1	1.41	0.3	0.12
777BAM62	48.1868	102.661	11419.3	533.995	182.353	2758.05	55.7098	58.3872	63.0638	194.422	14.7346	56.588	9.71466	51.6982	14.236	2.68383	13.701	1.92989	12.1671	2.17112	6.34908	0.883741	5.18508	0.692029	2.96887	1.20103	0.259018	0.172371
777BAM63	23.6016	69.5282	4006.46	403.395	82.9777	2583.88	23.5501	27.3609	16.3495	23.934	14.2006	45.639	6.66721	29.3051	7.34218	2.12723	6.76672	0.886244	5.33081	1.00119	3.16764	0.47154	3.07301	0.402415	1.02538	0.76812	0.445706	0.187853
777BAM71	56.5526	151.69	14414.1	609.049	139.947	2718.76	81.0788	83.8111	76.8694	223.062	16.4837	61.5551	11.3105	62.5158	19.3229	3.31063	19.7065	2.85959	18.3671	3.45999	9.24462	1.20953	7.5215	0.971323	3.34489	1.36419	0.31836	0.161294
777BAM72	46.5527	82.1307	7442.64	448.65	166.047	2795.32	49.2347	27.0714	48.4338	142.192	12.5698	39.3484	5.74771	25.8361	6.16452	1.8843	5.58791	0.75647	5.20328	1.03136	3.03277	0.415037	3.3246	0.43324	2.12191	1.20361	0.245549	0.216199
777BAM73	49.7475	97.5468	10924.2	560.953	202.348	2906.19	56.5689	50.2644	61.8606	173.372	14.7693	52.082	8.66898	46.6162	12.1416	2.2651	11.9745	1.75008	10.7769	2.05725	5.59506	0.713375	4.22096	0.582391	3.17866	1.32717	0.414746	0.240067
777BAM74	50.234	85.0349	9854.03	481.062	186.215	3011.2	64.6196	43.0552	60.0763	188.51	14.6509	53.2989	8.86983	43.961	11.055	2.5008	10.0842	1.38323	8.82578	1.69119	4.7405	0.672955	4.24148	0.594873	2.84051	1.2986	0.26819	0.183244
4909AM12	56.0271	80.6131	12837.2	526.239	166.255	3095.23	61.7813	49.4359	64.8561	185.536	20.0997	76.4902	11.8893	54.9903	11.4676	2.32095	10.7252	1.48286	8.71018	1.84513	5.5667	0.757932	5.34126	0.763621	2.8118	1.24901	0.280431	0.161967
4909AM13	54.1598	70.8705	8561.98	442.767	193.408	2923.47	43.1997	41.6234	44.3695	69.5568	15.5955	56.0887	8.54634	38.4627	9.28686	2.2185	8.37868	1.27144	8.02887	1.57343	4.66229	0.720474	4.41806	0.66655	2.09803	1.04502	0.333017	0.254348
4909AM21	55.0087	139.214	10537.5	1011.87	197.179	2853.43	49.944	78.9465	72.7501	167.962	16.4952	64.1791	10.8751	59.8841	16.9013	2.62523	18.0232	2.68436	16.9561	3.08797	8.58139	1.08063	6.40775	0.972856	2.81351	1.18907	0.324973	0.123493
4909AM22	50.4335	73.9462	8215.66	445.605	181.225	3177.1	46.5671	40.6454	42.8954	61.0669	15.0572	53.4972	7.88547	37.4467	8.72797	2.01567	8.36761	1.27754	7.84437	1.54707	4.73527	0.695893	4.68769	0.656086	2.2353	1.0611	0.366637	0.264533
4909AM31	58.7678	80.2736	11115.2	481.251	151.068	2789.06	54.6477	50.1629	61.7926	146.043	18.2029	61.208	9.24104	44.3482	11.819	2.42399	11.1568	1.62763	10.489	1.98973	5.84013	0.852583	5.14082	0.740268	3.05183	1.31824	0.463276	0.310366
4909AM32	60.0711	95.5318	13552.5	684.092	172.126	2912.97	62.4543	58.8864	81.1185	136.11	16.5862	60.3551	9.623	50.7974	14.2532	2.54134	13.9436	1.91035	12.3198	2.34763	6.60946	0.845703	5.94935	0.795628	3.66825	1.39723	0.337493	0.209387
4909AM33	61.645	84.4639	10978.9	621.125	285.405	2620.86	53.6156	45.7311	51.0629	108.957	16.6048	58.8716	8.93432	41.7306	10.2288	2.28367	9.43649	1.3512	8.90845	1.71857	5.24357	0.799216	5.21086	0.779325	2.43059	1.32384	0.36948	0.217704
4909AM41	52.0544	87.0063	11689.6	526.31	146.725	2475.47	61.966	47.2743	67.3358	146.987	16.3965	62.7755	9.63685	45.2407	11.0704	2.37403	10.3468	1.45863	9.21394	1.81356	5.22634	0.748929	5.1657	0.727172	2.80938	1.8127	0.339667	0.166148
4909AM42	54.9858	74.5119	12755.4	544.703	237.178	2697.43	68.7662	43.0541	69.4667	154.131	15.7542	56.4042	8.32603	38.7059	9.88981	2.21648	9.52454	1.37391	8.0747	1.65355	4.93231	0.706176	4.69758	0.627679	2.95199	1.44453	0.282683	0.198695
4909AM43	43.3271	74.9608	7125.43	398.705	154.534	2650.67	37.6287	49.9193	32.5445	41.9482	18.0114	65.8511	9.98561	47.0592	11.1326	2.27692	10.9673	1.56196	9.84806	1.98971	5.49334	0.794126	5.31189	0.684743	2.24447	0.92775	0.380498	0.281965
4909AM51	58.7551	86.7592	7794.26	391.444	166.52	2683.66	41.9921	48.4086	43.9311	43.7188	15.938	51.2392	8.13128	40.6925	9.9798	2.18327	10.0053	1.44591	8.89486	1.84669	5.67393	0.780431	5.54562	0.807789	2.54183	0.84018	0.317575	0.247609
4909AM52	51.06	82.0519	9966.11	489.284	269.965	2663	50.3414	51.0127	64.0002	132.536	18.6892	61.7727	10.2971	50.6101	11.4993	2.23185	10.9864	1.5929	9.64929	1.86613	6.04184	0.781585	5.43099	0.789229	2.96536	0.912367	0.211947	0.160027
4909AM62	66.4242	84.5692	14954.2	553.928	162.452	2510.87	59.0562	52.442	72.3121	113.233	19.9018	69.4035	10.957	49.1791	11.8832	2.55061	10.9733	1.53128	9.66611	1.9484	5.74264	0.814673	5.92295	0.901177	3.08227	1.11232	0.251845	0.119828
4909AM71	58.5797	74.8232	12426.6	550.575	344.084	3215.53	48.7529	42.0113	58.5499	85.139	18.3933	63.5335	9.25943	42.06	10.146	2.29408	9.11179	1.27989	7.98566	1.54184	4.73456	0.664727	4.78961	0.650952	2.5725	1.25029	0.493807	0.473619
4909AM72	50.1216	75.3855	8065.59	465.686	249.807	2660.32	40.1191	43.9777	34.5338	139.587	17.4651	62.8131	9.07327	40.5227	10.033	2.19223	8.74938	1.38343	8.24709	1.64657	4.96443	0.701595	4.9887	0.738495	2.29489	1.08545	0.398162	0.297429
4909AM81	72.1081	107.863	15068.2	586.173	94.5965	2746.86	64.0053	55.4763	68.2996	174.444	17.613	60.6023	9.71214	47.0265	12.7023	2.47855	12.0794	1.79904	10.6787	2.12224	6.40791	0.890658	5.61349	0.72127	2.75519	1.44292	0.401392	0.257641
4909AM82	57.9557	81.4033	9879.14	488.089	212.537	2769.64	55.5746	41.2936	48.9593	116.397	15.0656	53.1796	8.00094	36.7864	9.31105	2.37243	8.16306	1.29943	7.55449	1.57655	4.77749	0.668909	4.98285	0.70736	2.49091	1.23633	0.290369	0.237311
4909AM83	57.0923	77.1769	9291.49	472.306	253.778	2717.95	56.7948	41.1807	51.1596	114.46	15.5328	52.9556	8.18197	37.065	8.95741	2.20752	8.64739	1.22193	7.63892	1.63968	4.65005	0.669944	5.11443	0.677748	2.20953	1.03207	0.366189	0.302444
4809AM11	56.5476	107.824	11351.4	491.747	107.709	2737.08	48.5687	59.7279	61.6891	46.9367	16.2777	58.6136	9.85124	47.4034	13.2707	2.50402	12.4511	1.87722	11.231	2.22185	7.20052	0.880709	6.04984	0.801628	2.8264	1.08737	0.21804	0.13849
4809AM12	63.7223	86.834	8487.08	444.937	184.447	2794.46	48.4333	45.2957	44.4724	63.6781	15.316	53.3323	8.32939	40.4625	10.1004	2.28747	9.32989	1.35061	8.48774	1.67357	5.2896	0.758558	5.53264	0.770369	2.2444	1.04176	0.258411	0.149949
4809AM21	61.3336	155.107	15579	655.284	108.555	2435.65	75.8529	89.5037	82.7807	213.067	19.6155	81.898	14.0272	73.3464	21.7523	3.17561	20.8058	3.07501	18.2487	3.61208	10.1422	1.3069	8.22347	1.0553	3.45422	1.49803	0.252904	0.125862
4809AM22	55.5599	90.7454	13461.8	548.374	150.546	2457.42	58.5433	54.3255	65.0195	197.3	19.997	77.1151	12.2302	56.5923	13.4826	2.46381	11.2849	1.58019	10.5048	2.07327	6.00526	0.847741	6.04709	0.792533	3.06923	1.24785	0.193832	0.0795537
4809AM23	55.3674	77.2945	8570.52	452.808	197.509	2783.69	49.7234	43.2406	43.115	100.754	16.2644	58.1492	8.56487	39.3307	9.62712	2.29922	9.36171	1.29581	8.16739	1.67594	4.84448	0.770619	5.05431	0.742075	2.08879	1.13121	0.396772	0.347448
4809AM31	45.2446	76.8342	8317.84	468.454	239.505	2825.96	44.2835	42.863	35.4048	56.5734	14.7221	54.8525	8.34865	38.405	9.50029	2.10085	8.77346	1.2992	8.44443	1.69072	4.90762	0.735628	4.84452	0.696257	1.79837	1.11446	0.335433	0.2563
4809AM32	67.0866	79.0508	11997.9	520.604	214.558	2877.53	70.6478	48.1689	69.1725	162.58	17.2769	61.3766	9.38706	44.8302	11.2955	2.65111	11.3354	1.52436	9.57845	1.90046	5.30827	0.784267	4.79361	0.680313	2.98123	1.47451	0.469794	0.416389
4809AM33	52.3886	78.8687	11442.6	482.133	150.881	3218.5	54.1181	46.9739	58.3851	145.09	18.0761	66.7691	10.4227	48.2088	11.2185	2.26859	10.1365	1.40254	8.71223	1.74936	5.30158	0.749222	4.71774	0.672664	2.89441	1.28694	0.384221	0.265325
4809AM41	72.5399	113.241	14826	568.463	144.866	2828.57	74.449	65.3638	78.6545	133.775	17.5966	65.494	10.7036	52.926	14.5673	2.87387	14.1464	2.10477	12.812	2.55703	7.45423	0.987303	6.741	0.876909	2.92287	1.44494	0.362441	0.240525
4809AM42	60.7812	76.1339	8619.76	427.085	184.155	3119.4	44.4721	41.8902	42.2719	52.6429	14.8912	51.7607	8.0097	38.1223	9.91955	1.98022	8.58551	1.29789	7.93952	1.61975	4.78174	0.680285	4.58385	0.690298	2.24628	1.01526	0.347502	0.262309
4809AM62	63.4082	73.4343	12474.7	526.532	238.126	3031.76	68.1062	40.026	61.8663	133.135	15.1955	54.578	8.09761	37.7559	9.37167	2.36551	8.23921	1.13786	7.61219	1.54766	4.63058	0.62546	4.56174	0.623292	2.58178	1.38511	0.307111	0.317345
5709BAM12	56.7987	124.425	14671	994.575	700.11	2462.17	56.3575	64.5321	61.141	197.735	16.6583	60.1934	10.006	51.7905	13.7775	2.33936	14.0897	1.93225	12.4805	2.54481	6.81394	1.04643	5.94677	0.831095	2.65449	1.07973	0.367191	0.262498
5709BAM13	63.1601	80.28	8592.83	449.067	213.53	2959.42	37.6837	31.1615	39.4586	50.1726	13.5574	49.7521	7.31124	30.6921	6.22908	1.54279	6.19274	0.885767	5.70738	1.18275	3.33038	0.495636	3.52688	0.513269	1.78333	0.690203	0.206951	0.134723
5709BAM21	55.5176	64.5415	9659.82	442.475	238.489	2737.17	48.0054	24.8034	41.0245	107.393	11.1015	38.6338	5.39895	23.624	5.68007	1.34382	5.22963	0.753205	4.67108	0.94262	2.85299	0.395137	3.07831	0.423119	1.8932	0.702038	0.107064	0.114107
5709BAM22	62.19	72.1446	8834.19	446.509	206.901	2718.24	39.9519	26.5172	41.3098	85.6512	12.1878	43.697	6.11687	24.9029	5.393	1.40488	5.22706	0.74182	4.8387	0.99647	2.93729	0.476579	3.22145	0.487382	1.98011	0.813147	0.292042	0.189593
5709BAM23	66.8574	79.7452	8964.23	473.365	230.219	2883.74	41.8402	31.2251	39.5886	83.1014	13.1969	49.8516	7.2305	30.2937	6.8704	1.53681	6.57928	0.957978	6.01516	1.20665	3.48119	0.514326	3.47992	0.548169	1.99817	0.663505	0.23323	0.160763
5709BAM31	57.8501	95.6496	14938.8	848.733	1023.42	2885.59	54.4161	64.1832	61.2017	212.853	17.0504	67.6681	11.0994	54.6021	14.741	2.09916	14.5393	2.0829	13.9732	2.65547	6.75912	0.859912	4.95711	0.617054	2.89667	1.28734	0.405183	0.393964
5709BAM32	58.1843	77.499	6464.5	447.135	254.798	2593.65	28.904	30.7191	27.79	32.4756	13.5215	52.2649	7.32217	30.5446	7.01557	1.48698	6.27317	0.909732	5.97325	1.13886	3.15452	0.510987	3.2814	0.428401	1.45173	0.762064	0.369045	0.19601
5709BAM33	63.4019	70.4218	13832.8	406.764	195.759	2731	57.7655	16.6114	63.1678	132.992	11.6795	36.7342	4.8064	19.4043	3.78736	1.53175	3.22623	0.493911	2.87479	0.583247	1.93569	0.257828	2.14193	0.328734	2.27221	1.00138	0.227825	0.153275
5709BAM34	53.9849	81.4552	6777.05	448.705	288.486	2564.88	29.8171	30.6838	32.9787	62.9538	15.1156	55.6113	7.86321	30.4624	7.01878	1.65343	5.74928	0.898293	5.5614	1.13778	3.46221	0.513253	3.37454	0.59269	1.4709	0.664536	0.461122	0.259808
5709BAM41	57.8324	69.2799	8939.45	433.858	484.161	2492.38	33.0837	30.3906	39.8687	66.8075	14.8563	46.9249	6.3937	27.4249	6.13429	1.48952	5.33342	0.826259	5.55908	1.07739	3.50182	0.49097	3.38653	0.473612	1.92597	0.803324	0.332517	0.212119
5709BAM42	58.3356	74.3392	7995.37	450.565	930.34	2516.1	40.5362	34.468	39.1993	116.549	14.5238	47.1579	7.10941	30.9105	7.07006	1.61813	7.17242	1.07101	6.79634	1.29177	3.86504	0.577369	3.67623	0.558805	2.01004	0.821508	0.322702	0.259811
5709BAM51	68.3257	85.5	11565.4	531.409	298.36	2510.03	46.3163	28.1445	60.116	95.9628	13.0423	37.715	5.51457	24.2642	5.11393	1.38141	5.54806	0.778642	5.09125	1.04421	3.14739	0.451902	3.18511	0.544843	2.41324	0.843727	0.392372	0.212656
5709BAM52	68.2967	81.0882	11096.8	403.474	220.312	2475.67	52.5589	24.1215	62.5943	103.645	12.7986	36.2494	5.20884	22.4765	4.74726	1.53498	4.57948	0.662504	4.30288	0.879238	2.89357	0.444789	3.16701	0.502999	2.35577	0.909473	0.324897	0.177521
5709BAM53	56.8894	76.5697	11181.2	388.428	179.331	2539.01	52.1056	26.7938	51.87	94.5893	10.9341	31.3556	4.87531	22.1701	5.72481	1.43379	5.63977	0.809988	5.27477	0.973709	3.11125	0.424444	2.73793	0.446493	1.96463	0.63865	0.118813	0.0807584
5709BAM61	61.1959	66.0167	11226.7	364.581	197.24	2531.3	49.5692	20.9645	55.4292	99.7102	11.0243	35.6956	4.92096	21.6206	4.53782	1.35217	4.2414	0.598693	3.84101	0.797101	2.3696	0.330452	2.70928	0.422593	2.22871	0.909815	0.314946	0.218287
5709BAM62	61.5616	84.5077	6384.75	444.089	226.272	2935.84	31.3712	33.6392	32.5021	32.5291	13.7998	51.8114	7.58048	31.3362	6.84599	1.45065	7.17222	0.980081	6.5159	1.19995	3.79184	0.524312	3.90225	0.59573	1.91971	0.74913	0.350612	0.187848
6309AM11	51.5929	117.33	12038.3	678.1	73.8147	3186.24	44.8654	75.1203	71.7433	132.9	18.3249	73.9023	12.3723	64.5283	17.704	2.76461	16.6867	2.51451	15.1434	3.06354	8.71216	1.10328	6.96419	0.925468	3.23937	1.62068	0.138838	0.142714
6309AM12	55.5256	120.123	15695.1	770.2	62.1088	3370.42	77.1766	97.1479	102.035	253.404	22.6275	93.7455	16.3999	85.4331	23.49	3.23489	22.7664	3.35279	19.8132	3.77333	10.8816	1.41967	8.27738	1.11362	4.55771	1.87376	0.159445	0.124445
6309AM13	41.8156	88.4387	5998.09	494.734	66.1077	3511	36.5452	46.6416	33.9256	49.8823	18.7416	66.3749	10.1117	46.4861	10.6778	2.26065	9.29689	1.39423	8.87278	1.75986	5.12702	0.771894	5.19697	0.835652	2.13032	1.18107	0.230475	0.128483
6309AM21	54.5557	184.835	13488.5	782.745	246.433	2618.88	83.1704	90.4644	79.4638	216.982	16.8463	69.4539	12.5712	71.1331	21.5012	3.28386	22.081	3.17109	19.5068	3.7594	10.5084	1.30164	8.0724	1.09426	3.30288	1.67495	0.204568	0.0579103
6309AM22	51.8776	180.035	14959	733.595	59.4645	2408.95	77.1869	103.607	89.9054	146.189	20.4157	83.0504	14.8814	81.6855	24.8346	3.40996	25.1028	3.64721	22.7318	4.29892	11.7798	1.53716	9.36666	1.21279	3.66621	1.6596	0.239476	0.101664
6309AM23	56.3324	92.8439	6933.06	516.239	69.6118	3458.17	45.2362	46.6395	45.6744	66.8108	18.2716	63.4821	9.82033	46.1617	10.7118	2.41583	9.65354	1.35458	8.75977	1.72999	5.52113	0.764045	5.82017	0.80609	2.49741	1.16766	0.277461	0.141446
6309AM32	49.7662	134.308	15612.9	758.253	42.4648	2992.83	75.5325	99.7218	95.0863	261.285	22.0387	90.0088	15.6037	83.5477	24.6939	3.19487	24.0815	3.51535	21.0355	4.10653	10.7404	1.45014	8.40273	1.09169	4.01744	1.92809	0.239466	0.143656
6309AM33	51.1477	89.7053	8363.25	561.943	75.3115	3514.87	43.4409	44.6125	45.8321	63.6258	17.808	64.1458	9.80745	44.3742	9.9797	2.45711	9.24303	1.32333	8.24336	1.65392	4.9425	0.71126	5.20929	0.786772	2.31394	1.39612	0.191474	0.141231
6309AM42	55.1479	101.82	7653.9	492.758	49.05	3738.39	38.6366	57.8336	57.5602	34.1838	17.7499	60.7391	10.451	50.477	13.1972	2.43579	12.8372	1.82068	11.6656	2.30375	6.47955	0.869147	6.21714	0.870527	2.85775	1.07304	0.297188	0.153772
6309AM43	55.8456	81.2934	6168.47	415.228	47.0405	3094.02	37.1014	47.1268	38.0798	69.2981	17.8272	58.6504	9.47312	45.7043	10.902	2.28662	9.37974	1.38149	8.43271	1.74666	5.14275	0.800251	5.37811	0.815058	2.43347	1.11495	0.256585	0.112867
6309AM51	56.8237	152.994	14565.2	622.306	74.8568	2425.41	74.1325	88.5459	81.2708	179.836	19.0303	76.8613	13.7108	73.0995	21.0487	3.24674	20.2029	2.97218	18.1108	3.48953	9.90011	1.26463	8.66889	1.12439	3.45598	1.47686	0.205224	0.0383816
6309AM52	56.4264	152.039	15960.6	763.088	52.2732	2650.41	80.6973	101.274	92.1792	301.481	21.9903	89.8343	15.6147	86.1142	25.7576	3.41387	25.8243	3.62422	23.2517	4.20481	11.7329	1.38459	8.58372	1.22588	4.20332	1.7887	0.164519	0.0592046
6309AM53	25.4693	92.0544	4917.28	462.004	52.842	2909.5	22.1192	42.2103	19.2465	38.197	7.83208	36.4176	6.43028	33.0017	8.82922	2.01417	8.88507	1.2841	8.36955	1.73342	4.69323	0.709721	4.36848	0.641911	2.06013	1.00661	0.0947007	0.112315
6309AM61	47.2101	83.0731	5981.68	419.402	57.1217	3178.56	32.6526	48.3168	37.5769	44.4154	17.8167	57.9334	9.46872	44.8939	10.8881	2.2733	9.83452	1.46856	9.20113	1.86152	5.44371	0.858943	5.52126	0.807643	2.43885	1.04675	0.25832	0.134515
6309AM72	50.5628	115.229	11962.7	610.37	40.7839	3575.83	57.0216	74.9631	80.1031	190.7	20.2061	68.5853	11.3499	57.216	15.4817	2.76436	15.6505	2.31577	14.9175	2.93246	8.70609	1.14126	7.48056	1.02453	3.50593	1.45802	0.273471	0.115982
6309AM73	49.013	90.6777	6720.52	482.395	59.8307	2913.24	36.1779	49.9704	38.5179	51.2604	18.6833	60.0681	9.93158	47.5932	11.2586	2.35347	10.4423	1.5376	9.83545	1.89776	6.00076	0.796137	5.70636	0.835011	2.41892	0.971703	0.283981	0.118626
6309AM83	55.9039	79.5709	9359.35	538.737	64.7918	4244.61	45.8216	42.1944	53.225	134.415	21.6356	75.679	11.0162	48.8097	10.4981	2.73633	9.26063	1.31796	8.10629	1.5426	4.77144	0.75359	4.89394	0.695285	2.36711	1.56284	0.363436	0.222183
6309AM84	53.5547	93.2195	12582	710.932	87.9453	4020.96	58.0608	40.2359	59.8547	198.869	19.075	67.2453	9.94553	42.7887	9.15658	2.37379	8.27551	1.19606	7.55948	1.53361	4.41733	0.674084	4.74714	0.758131	2.62231	1.64835	0.333942	0.215209
6309AM85	53.7119	88.9856	6928.84	520.454	62.4866	3448.42	38.4676	46.4916	38.5607	67.8635	18.9284	68.5464	10.5614	46.3805	11.4333	2.47757	9.56302	1.41966	8.64369	1.7778	4.93003	0.739549	5.68431	0.780858	2.02051	1.30746	0.194695	0.169357
7109AM11	48.5808	88.5637	10214.4	577.155	63.9921	3649.3	46.3648	50.2548	60.3277	108.424	19.7681	72.5445	10.9046	47.5175	12.2738	2.4228	11.9208	1.6635	10.1181	1.92037	5.61184	0.741871	5.12424	0.701109	2.88455	1.5865	0.259641	0.20295
7109AM12	52.0024	85.3815	13373.6	639.039	114.298	3356.84	63.5566	37.2654	57.4302	210.511	19.8599	69.7734	10.0029	40.4153	8.98805	2.43806	7.78879	1.13151	7.10781	1.39112	4.15683	0.638272	4.19725	0.651976	2.54001	2.05821	0.269252	0.148753
7109AM13	49.5116	76.6625	7288.17	458.778	65.2283	3491.73	38.461	37.8524	40.1828	40.7191	18.5634	66.9599	9.42955	40.3813	9.19118	2.11807	8.12734	1.14722	7.2433	1.37777	4.35074	0.670689	4.49869	0.629222	2.51374	1.26028	0.275958	0.143681
7109AM21	48.0052	75.5299	11993.5	552.25	135.403	3711.18	57.1509	38.2542	51.6713	125.608	19.9025	68.001	9.81126	40.7585	8.75723	2.27173	8.16675	1.14577	7.53459	1.4956	4.5036	0.62017	4.68284	0.622986	2.56921	1.55475	0.228333	0.129607
7109AM22	48.1321	77.7068	9495.03	514.372	126.634	3264.24	48.0556	37.4659	53.8858	196.017	19.9989	71.4498	9.54799	40.1048	8.62266	2.40009	7.54563	1.08178	6.99812	1.46953	4.45465	0.631194	4.74161	0.68239	2.67887	2.0001	0.296506	0.190768
7109AM31	68.4481	155.828	17352.1	762.505	91.8239	2876.39	90.0128	118.726	127.076	317.491	26.266	96.8218	17.6396	96.2064	28.5993	3.67328	28.985	4.08496	25.7465	4.81773	12.8994	1.80443	10.1568	1.40331	5.11776	2.11717	0.185457	0.0933047
7109AM32	59.2735	108.684	13708.1	592.583	115.343	3060.54	62.5152	64.3054	84.3921	184.692	24.407	81.2674	13.3654	62.3454	15.5681	2.85884	14.2555	2.00162	12.1014	2.48061	7.4332	1.09442	6.54008	0.902729	3.67165	1.70509	0.253768	0.101783
7109AM33	52.5579	99.0394	6440.19	460.017	91.6982	3127.72	35.6026	44.1832	36.0868	38.9088	19.6996	62.3207	9.56084	42.8508	10.2403	2.2018	9.35567	1.37963	8.35021	1.74902	5.03737	0.789186	5.0731	0.790011	2.62517	1.201	0.310576	0.129427
7109AM34	32.0059	71.189	2511.62	384.029	94.3123	2502.23	10.5184	16.3864	9.17139	6.61574	2.78609	11.1409	2.13354	11.0553	3.29936	0.814436	3.07895	0.413692	3.04133	0.635967	1.8983	0.26883	1.78612	0.269685	0.839203	0.790864	bdl	bdl
7109AM41	59.8751	150.359	15970	713.212	63.7889	3302.55	80.5935	111.33	100.193	297.876	22.6905	93.7832	16.9503	91.5807	28.9827	3.44232	27.7596	4.12243	24.6417	4.69282	12.3318	1.57081	9.09019	1.19915	4.41966	2.41314	0.263006	0.160739
7109AM42	45.0334	79.5816	7833.93	484.82	90.7913	3369.34	47.0006	44.3083	46.2085	140.161	20.8144	78.4318	11.2347	49.4843	11.8435	2.40746	9.9958	1.4909	8.87	1.64744	4.85922	0.712645	5.04778	0.686953	2.56819	1.78542	0.304538	0.170524
7109AM52	51.6123	110.53	13477.4	656.01	63.6095	4096.35	67.1348	54.7178	72.7543	191.377	24.4704	80.9093	12.716	58.0862	13.3444	2.57849	12.0843	1.67856	10.1857	1.9371	6.07875	0.844289	5.2694	0.759455	3.41331	1.71509	0.244399	0.124569
7109AM53	50.0472	85.1472	7302.94	450.221	86.1163	3475.28	42.1461	43.2794	47.6323	55.7904	20.2918	66.1778	9.80215	44.8023	9.74526	2.43158	9.2367	1.27619	7.65416	1.65163	4.6102	0.672034	5.07426	0.754285	2.46431	1.40144	0.313146	0.143953
7109AM61	49.8512	77.4815	12273.1	627.767	158.043	3373.5	54.9979	34.936	54.5421	157.032	19.5339	66.0372	9.17309	39.5564	8.77092	2.30218	7.296	0.963894	6.22211	1.27741	3.86367	0.627543	4.19983	0.630601	2.42466	1.91686	0.245645	0.193392
7109AM62	45.8714	84.7131	7471.86	478.298	77.6882	3332.03	43.6464	38.5826	44.3816	77.2167	18.5911	64.8717	9.51296	41.4713	8.904	2.25905	8.10114	1.17173	7.21643	1.41671	4.39846	0.662548	4.66642	0.718593	2.07564	1.60068	0.310646	0.185172
7109AM71	49.8928	80.2236	13587.7	601.114	103.73	3309.23	48.1537	38.422	57.4021	182.839	19.877	69.8558	9.96563	44.0346	9.48102	2.58516	7.97643	1.15106	6.89443	1.37357	4.21148	0.646525	4.62206	0.636469	2.46677	1.94459	0.291237	0.178872
7109AM72	33.1834	87.3202	5934.59	446.34	75.5479	3289.27	25.8103	38.7917	23.1161	30.3688	12.0686	47.0689	7.46306	34.9079	8.98793	2.04067	7.65014	1.20691	7.41344	1.49691	4.33544	0.588261	4.33025	0.595633	1.75401	1.1706	0.148956	0.0791227
7109AM81	40.4198	70.2932	6198.27	371.097	17.8776	3448.74	31.4407	37.3523	39.9016	28.028	17.745	60.4446	8.7902	39.4005	8.51758	2.12108	7.71582	1.1345	6.64473	1.38726	4.26529	0.659915	4.46331	0.694853	2.26718	1.33242	0.299292	0.181767
7109AM91	48.216	128.519	17698.2	836.523	90.9174	3264.65	75.9153	79.2651	99.204	233.961	25.4735	96.5249	15.9836	78.5314	20.0477	3.14103	18.6358	2.55548	15.841	3.0812	8.9199	1.1982	7.80923	1.00297	4.11131	2.02433	0.196906	0.0872967
7109AM92	40.092	83.2013	5888.17	437.365	55.7186	3338.65	33.2065	38.2788	34.733	33.0862	17.9455	63.7478	9.13962	39.6619	8.71944	2.04561	7.77451	1.14144	7.14547	1.40084	4.48472	0.653664	4.65199	0.693661	2.1386	1.20533	0.293659	0.135625
7109AM101	54.0317	86.8572	9731.63	644.488	178.408	3198.54	53.5757	37.9923	52.7454	200.055	19.4668	66.985	9.37541	40.0859	8.52149	2.50626	8.4284	1.08724	7.30516	1.41311	4.43337	0.672312	4.55338	0.686244	2.5418	1.61726	0.21828	0.200581
Upper WCb
194AM11	79.8458	122.769	15346.5	758.963	70.4381	3204	91.0196	52.2344	57.2834	186.135	16.9865	53.2214	8.01111	39.5887	11.8735	2.89785	11.8306	1.68729	10.7999	2.12088	5.92681	0.698718	5.43304	0.756788	2.55382	2.46663	0.294286	0.141861
194AM12	60.42	104.294	11293.1	703.499	98.0858	3199.65	55.391	57.2144	67.6777	137.972	21.2285	74.1937	11.1689	51.9486	13.101	2.83337	12.6455	1.81288	11.6221	2.15048	6.42494	0.868701	5.97346	0.83286	2.94131	2.38743	0.307406	0.0906675
194AM13	43.5912	84.7317	10070	514.108	109.097	3921.23	54.8632	54.7071	51.7799	88.1921	22.5247	79.1475	12.1138	56.0256	12.7582	2.68445	12.1916	1.7292	10.2574	2.03977	6.2118	0.873858	5.8878	0.840655	2.49433	1.6619	0.271326	0.115673
194AM21	43.5005	19.7652	1074.79	92.3655	35.9928	4439.08	11.5402	15.0822	12.0508	11.2318	4.56324	20.1235	3.22271	14.9198	3.41402	0.964269	3.36834	0.403576	2.71363	0.55664	1.6836	0.277085	1.91577	0.280806	0.59481	1.71296	bdl	0.0829289
194AM22	55.3962	77.8607	8905.07	440.531	117.862	3935.95	45.8316	53.2751	47.2565	73.0935	22.806	79.2192	12.2523	55.0261	13.4784	2.89045	11.4292	1.56188	9.98051	1.96793	5.66403	0.860565	6.03092	0.884112	2.62412	3.02262	0.271126	0.171379
194AM23	53.8111	78.4149	7363.29	423.527	69.4665	3401.86	48.3222	54.645	45.0532	71.9627	21.381	75.3653	12.0283	53.3262	13.0317	2.74711	11.4735	1.69924	9.9232	2.04558	5.58891	0.911687	6.51809	0.930647	2.35487	1.51598	0.290727	0.293591
194AM31	52.1086	99.7681	11747.6	552.444	187.691	3797.81	59.3268	65.229	64.3385	200.222	21.1597	75.8586	12.3482	59.6954	16.0235	2.79686	13.9401	2.15394	13.2887	2.58574	7.22929	0.921925	6.27559	0.847781	3.21709	1.67403	0.205665	0.103107
194AM32	50.7555	87.1675	8715.57	490.595	148.154	3370.86	43.1847	52.6561	44.9166	96.2959	20.8725	74.025	11.1521	50.0177	12.807	2.55252	11.5379	1.68663	10.5322	2.04397	6.10152	0.903047	6.32635	0.848073	2.61325	1.74158	0.239665	0.146767
194AM41	62.9842	167.97	15377.1	517.165	54.8917	2929.64	74.9259	101.377	90.5069	194.801	19.2779	67.4999	12.7894	70.8537	22.1534	3.36087	23.6677	3.4304	21.0234	4.06885	11.1481	1.38119	9.18849	1.173	4.10857	1.42678	0.198125	0.0610253
194AM42	51.0799	112.105	14689	551.628	109.055	3155.42	72.1441	98.6021	82.4545	219.722	23.6106	79.1961	14.4929	76.5926	23.1588	3.40438	24.3086	3.32025	22.1164	3.96411	10.9397	1.38909	8.78041	1.24352	3.99183	1.66816	0.252059	0.100205
194AM43	42.2004	96.2495	7343.49	415.014	86.3181	3404.38	38.684	61.9579	42.5934	44.6921	24.9808	77.4096	12.636	59.3254	14.4975	2.95292	14.2423	1.99024	12.0765	2.3486	6.98741	0.94243	6.74158	0.956726	2.63668	1.17191	0.282567	0.109502
194AM51	71.1853	119.442	16604.2	618.447	103.508	2702.83	91.1609	69.9641	80.2369	210.282	21.1263	68.2375	11.533	57.5497	16.5302	2.9257	16.1181	2.35141	13.6336	2.79504	7.86643	1.14728	6.89807	1.04596	3.67754	1.83352	0.306137	0.264165
194AM52	55.2123	79.4719	14336.9	491.147	51.5536	2727.66	74.1034	61.6699	78.7183	203.172	20.7081	68.3207	11.1358	53.5395	13.2686	2.48141	14.1182	1.9734	12.0679	2.39691	6.9064	0.961277	5.90096	0.896937	3.51552	1.25835	0.18079	0.0892513
194AM53	32.0248	102.717	5883.05	446.038	70.6349	3052.07	25.8669	58.9841	22.5571	38.955	13.9994	55.3064	10.1202	51.9999	14.2714	2.82247	13.385	1.89533	11.9805	2.29745	6.87375	0.882546	6.18725	0.995312	2.01559	1.18907	0.130846	0.067549
194AM54	76.7086	123.216	14887.2	551.239	51.9008	3173.76	69.7469	74.075	91.0652	180.41	23.8739	71.9099	11.9613	62.3285	17.2266	3.47707	17.3444	2.46069	15.6345	3.00748	8.60095	1.07572	7.19732	0.978644	4.40947	2.00156	0.265828	0.14752
194AM55	45.9277	86.2603	7293.98	440.269	92.1215	3753.11	39.9555	57.4472	44.8362	46.4079	22.4805	73.0165	11.933	55.222	14.0761	2.86128	12.7077	1.74077	10.8278	2.22069	6.67456	0.951377	6.53397	0.95431	2.69021	1.23807	0.281912	0.112776
194AM61	45.0584	80.0653	8689.29	503.12	201.004	3206.72	41.173	56.465	51.1959	195.694	23.5822	80.5925	12.4489	58.3722	14.7788	2.70416	12.9193	1.85625	11.4932	2.13763	6.58638	0.830202	5.58887	0.80146	2.49583	1.8657	0.216139	0.404422
194AM62	46.9797	133.758	15258.4	658.833	167.954	3898.64	76.0017	75.397	73.062	199.853	18.4039	70.1747	11.8717	61.5348	16.9556	2.938	18.4238	2.54749	15.6187	3.06407	8.43272	1.08709	6.82765	0.94601	3.13573	1.833	0.244994	0.130346
194AM63	45.9487	104.632	14200.5	650.719	156.894	3183.25	73.1372	54.8843	69.4817	188.699	20.8587	74.3649	11.5421	52.7204	12.445	2.78922	11.5713	1.59628	10.643	2.09127	6.2874	0.880261	5.90609	0.82182	3.13389	1.77283	0.261508	0.0766152
194AM64	27.244	88.384	7071.68	497.236	99.9038	3685.4	35.685	55.6114	31.9223	48.1451	25.2042	95.2391	14.0273	64.0928	15.0107	3.02781	13.0343	1.81574	10.9684	2.13751	6.27602	0.840984	6.03045	0.836265	2.10394	1.44859	0.245066	0.169429
194AM71	47.5784	100.071	9120.34	593.055	135.369	3130.07	52.1702	78.4221	83.971	178.398	24.2343	82.7964	14.1703	73.4564	18.8036	3.02381	17.707	2.58281	16.1888	3.00852	8.90562	1.13035	7.25844	1.08348	4.31053	1.65085	0.208366	0.083275
194AM72	52.9789	92.2314	10454.6	522.254	228.863	3220.63	43.5876	54.2522	59.1309	124.86	22.5758	75.7475	11.6362	52.2897	12.4335	2.91243	11.7441	1.6378	10.0377	2.025	5.87205	0.853901	5.84252	0.863536	2.5288	1.64668	0.259154	0.12673
194AM73	41.4888	85.4853	6957.63	439.513	116.461	3336.03	37.9398	56.2728	48.1529	41.2433	20.7314	71.2693	11.3182	51.3798	12.17	2.60032	11.8128	1.70533	11.2259	2.15837	6.68659	0.914674	6.16211	0.949946	2.85929	1.29067	0.204966	0.138506
208AM21	52.1	148.9	12988	545	73	2016	61.4	82.7	73.1	184.1	18.17	73.8	12.9	66.19	19.81	3.08	18.64	2.78	16.95	3.3	9.42	1.21	7.57	1.04	3.41	1.3	0.24	0.06
208AM22	35.2	70.4	8341	427	114	3007	39.1	45.2	39	57.24	14.27	55.33	9.04	43.32	11.31	1.95	10.19	1.46	9.09	1.72	5.06	0.72	4.52	0.65	1.98	0.98	0.13	0.17
208AM23	26.4	70.8	4114	430	50	2927	15.3	40.4	11.9	11.68	3.09	18.21	3.9	21.88	7.6	1.97	7.39	1.17	7.57	1.52	4.62	0.68	4.54	0.71	1.44	1.29	0.04	0.13
208AM31	112.4	108	13748	636	103	2678	74.8	67.7	76.2	238.85	23.64	86.72	13.77	64.65	14.86	2.65	14.36	2.05	13.11	2.62	7.77	1.11	7.41	0.96	3.5	1.51	0.26	0.08
208AM32	54.2	68.3	7171	412	119	3427	40.8	36.7	43.5	59.4	16.03	54.38	8.03	35.02	8.46	2.07	7.97	1.09	6.96	1.41	4.07	0.62	4.37	0.59	2.15	1.05	0.21	0.07
208AM33	50.7	80.4	5979	437	143	2907	34.8	40.4	32.9	58.41	16.51	58.91	8.92	38.8	9.9	2.36	8.55	1.26	8.12	1.55	4.41	0.63	4.36	0.66	1.9	1.11	0.17	0.1
208AM34	63.6	77.4	10670	475	121	3356	59.9	42.6	53.2	144.99	16.12	58.95	9.14	41.46	9.88	2.2	8.97	1.3	8.44	1.57	4.54	0.68	4.47	0.61	2.53	1.23	0.16	0.06
208AM42	76	74.8	10536	488	230	3141	49.8	38.1	47.3	96.04	19.11	65.79	9.02	37.76	8.84	2.36	8.09	1.09	7.29	1.43	4.15	0.66	4.18	0.64	1.85	1.8	0.22	0.12
208AM43	67.7	91.9	11456	614	159	3241	68.5	41	54.8	158.33	13.19	45	6.84	32.32	8.87	2.15	9.34	1.37	8.27	1.64	4.75	0.65	4.1	0.6	2.45	1.76	0.18	0.08
208AM44	60.1	73.4	7674	438	139	3228	43.2	43.5	45.6	72.16	17.72	60.48	9.28	42.2	10.11	2.25	9.68	1.35	8.29	1.67	4.8	0.71	4.77	0.68	2.25	1.07	0.19	0.2
208AM51	79.2	106	11816	544	106	2987	58.4	47.8	60.5	147.09	17.38	58.58	9.03	41.98	10.59	2.54	10.86	1.49	9.56	1.84	5.3	0.76	4.78	0.7	2.66	1.59	0.26	0.08
208AM52	61.6	93.2	12235	545	108	3347	66.5	47.1	59.1	153.89	17.88	58.53	8.84	41.32	10.4	2.45	10.51	1.54	9.23	1.9	5.44	0.75	5.24	0.71	2.56	1.89	0.27	0.13
208AM53	38	89	5967	466	147	3163	33.4	46.6	27.9	50.26	20.85	71.84	10.86	48.27	11.68	2.61	10.96	1.49	9.23	1.81	5.19	0.71	5.04	0.73	1.94	1.08	0.2	0.14
208AM54	66.9	97.5	10768	540	159	3033	54.3	45	53.9	145.31	18.41	64.41	10.1	46.15	11.04	2.23	9.89	1.47	8.52	1.77	4.88	0.69	4.99	0.74	2.54	1.43	0.19	0.09
208AM56	73.7	114.4	11016	564	70	3305	60.1	64.8	70.1	160.81	16.36	57.2	10.35	53.7	14.87	2.53	15.54	2.17	12.78	2.49	7.26	0.9	5.96	0.88	3.36	1.98	0.21	0.11
208AM57	57	83	7415	447	171	3160	40.9	47.2	43.2	67.62	18.32	61.17	9.65	43.71	10.77	2.38	10.23	1.43	8.72	1.72	5.26	0.79	5.38	0.72	2.37	1.23	0.22	0.21
208AM58	60	88.8	10664	501	163	3049	45.3	47	55.8	115.64	18.49	60.4	9.63	44.84	10.74	2.31	10.12	1.46	9.2	1.77	5.22	0.73	5.17	0.68	2.6	1.47	0.19	0.09
208AM59	141	78.6	8538	465	158	3163	48.2	49.2	53.1	150.77	19.18	63.37	10.09	48.14	11.6	2.38	11.25	1.55	9.61	1.85	5.61	0.84	5.07	0.74	2.83	1.28	0.23	bdl
208AM510	58.5	79.6	8670	451	125	3239	46	49.2	52.6	122.9	19.01	62.42	10.01	48.22	11.79	2.37	11.41	1.59	9.75	1.89	5.51	0.79	5.14	0.74	2.76	1.4	0.22	0.14
317AM11	42.54	78.3	12170	512	156	2807	67.9	44.2	61	148.43	15.64	54.51	8.7	40.9	10.18	2.18	9.48	1.39	8.52	1.69	5.21	0.72	4.53	0.66	2.79	1.24	0.14	0.03
317AM12	41.31	81.6	12333	531	191	2598	69	41.2	62.5	168.39	16.95	57.02	8.98	41.49	9.62	2.26	9.24	1.29	7.85	1.65	4.86	0.68	4.69	0.71	2.56	1.34	0.14	0.05
317AM13	15.44	102.1	5621	435	116	2902	15.6	65.4	19.8	4.15	9.37	41.31	7.88	40.38	12.98	2.06	12.73	2.03	12.62	2.68	7.71	1.1	7.06	0.97	1.8	1.17	0.16	0.07
317AM21	53.23	104.2	11105	516	143	3256	63.8	56.3	61	157.54	19.68	65	10.52	49.33	12.27	2.6	11.21	1.72	10.97	2.15	6.52	0.96	6.41	0.88	2.92	1.24	0.23	0.06
317AM22	33.2	114.7	5774	441	105	2975	14.1	79.1	21.7	2.69	9.34	42.91	8.72	45.63	14.56	2.16	14.81	2.34	15.1	3.09	8.97	1.39	9.03	1.32	2.49	1.52	0.18	0.08
317AM31	39.52	91.8	9789	508	107	2819	44.5	61.5	54.5	97.96	21.04	77.35	12.81	60.52	14.88	2.36	13.27	1.91	12.64	2.41	6.89	0.98	6.28	0.85	2.83	1.11	0.14	0.05
317AM32	40.6	88.7	6789	471	138	3131	35.5	48.6	30.4	66.54	21.1	70.84	10.86	49.47	12.18	2.55	10.43	1.58	9.57	1.96	5.3	0.76	4.8	0.71	1.93	1.17	0.18	0.06
317AM41	206.78	91.8	13718	465	138	2740	67.4	54.5	71.6	147.01	19.99	62.78	10.35	49.37	12.31	2.59	11.64	1.83	10.85	2.07	5.95	0.82	6.63	0.93	3.52	1.08	0.25	0.06
317AM42	58.23	88.2	12745	493	153	2771	70.2	51.7	71.6	162.87	18.41	58.42	9.9	47.33	12.23	2.5	11.16	1.67	10.29	1.94	5.78	0.85	5.39	0.83	3.22	1.26	0.21	0.05
317AM43	52.71	96.3	8673	478	160	3407	49.6	53.8	45.4	94.53	22.07	70.15	11.2	51.74	12.63	2.82	11.82	1.71	10.47	2.12	6.32	0.91	5.61	0.87	2.52	1.18	0.23	0.09
317AM51	36.78	95.9	7945	471	162	3349	43.9	53.2	41.8	78.03	21.93	70.6	11.19	51.38	12.67	2.79	11.15	1.66	10.53	2.02	6.16	0.81	5.56	0.88	2.34	1.06	0.18	0.06
317AM52	43.9	94.6	8722	480	156	2961	43.5	56.4	50.8	92.85	20.08	65.36	10.89	50.57	12.58	2.63	12.19	1.65	11.46	2.16	6.39	0.95	5.82	0.94	2.74	1.28	0.2	0.08
317AM61	168.6	84.9	8845	449	141	3277	43.9	54.1	51.4	98.99	21.75	66.62	10.66	49.7	12.38	2.37	11.38	1.68	10.35	2.02	5.78	0.84	5.53	0.81	2.57	1.31	0.29	0.15
317AM62	66.3	87.4	8943	458	162	3153	45.2	47.8	50.6	100.19	19.63	62.59	9.63	43.71	10.4	2.45	10.59	1.41	9.38	1.91	5.46	0.8	5.16	0.73	2.68	1.29	0.2	0.11
317AM63	63.78	79.3	9082	456	121	3241	46	46.7	45.6	90.53	19.06	63.02	9.67	42.97	10.66	2.32	10.04	1.41	8.92	1.69	5.19	0.71	4.83	0.72	2.32	1.31	0.17	0.11
317AM71	55.46	82.5	11375	443	106	3249	49.2	50.7	57.2	127.42	19.14	64.15	10.4	50.5	12.41	2.45	11.43	1.68	9.7	1.94	5.71	0.79	5	0.75	2.87	1.28	0.14	0.07
317AM72	332.56	91.9	14176	500	127	3234	64.1	54.8	79.1	202.89	24.92	77.82	12.6	60.59	14.95	3.12	14.24	1.89	10.39	2.16	6.14	0.8	5.79	0.89	3.87	1.89	0.51	0.21
317AM73	93.82	82.4	11275	497	167	3279	60.4	46.1	52.2	101.55	19.52	62.77	9.38	40.14	9.99	2.63	9.41	1.33	8.51	1.79	5.5	0.81	5.23	0.73		1.52	0.26	0.1
317AM81	51.65	129.4	10666	509	126	2840	50.2	82.9	77.2	65.96	21.09	71.89	12.71	64.89	17.7	2.93	18.51	2.57	16.37	3.13	9.19	1.28	8.07	1.12	3.6	1.19	0.2	0.07
317AM82	47.75	110.3	8513	465	107	3018	36	72.5	55	51.88	17.89	61.32	11.01	55.58	15.38	2.63	14.83	2.23	13.98	2.74	8.12	1.09	7.21	0.99	2.89	1.09	0.19	0.1
317AM83	58.57	142.3	11885	533	134	2689	56	77.4	77.6	162.19	22.98	75.46	13.33	66.31	16.89	2.97	16.43	2.33	14.51	2.91	8.68	1.21	8.08	1.21	3.42	1.31	0.21	0.08
317AM84	63.7	130.9	12751	522	144	3157	62.8	78.8	81	208.09	24.31	80.74	14.03	70.04	17.72	2.94	16.76	2.46	15.01	2.99	8.78	1.26	7.84	1.17	4.1	1.27	0.24	0.06
317AM85	51	137.4	9939	489	115	2709	52.1	84.8	76.2	60.37	20.38	68.3	12.33	64.76	18.21	2.82	18.43	2.71	16.45	3.29	9.6	1.29	8.14	1.14	3.6	0.98	0.2	0.04
394AM11	43.4	98.5	9034	452	70	2496	45.8	64.5	58	90.87	19.76	71.92	12.17	59.43	14.65	2.21	13.63	1.96	12.34	2.42	7.03	1.01	6.71	0.86	2.41	1.09	0.17	0.07
394AM12	40.4	79.9	11698	496	156	2804	69.2	47.8	64.7	139.23	17.54	59.47	9.33	44.29	10.69	2.44	10.38	1.44	9.06	1.84	5.57	0.79	5.54	0.69	2.89	1.14	0.25	0.04
394AM13	27	96.5	6027	455	202	3358	31.6	48.6	33.4	55.2	21.35	71.22	11.19	49.62	12.42	2.4	11.4	1.63	9.9	1.84	5.37	0.8	4.9	0.65	2.04	1.04	0.15	0.1
394AM22	37.1	99	6283	450	141	3865	29.9	53.3	33.3	55.2	22.34	74.32	11.87	53.95	13.18	2.48	11.53	1.64	10.65	2.11	6.13	0.83	5.72	0.79	1.99	1.39	0.24	0.12
394AM23A	40.7	95	8355	437	119	4301	50.1	53.2	50.6	73.69	18.31	59.42	9.7	44.89	11.5	2.31	11.15	1.58	10.74	2	5.64	0.86	5.72	0.88	2.62	1.09	0.42	0.25
394AM32	43.5	93.8	6770	391	130	4195	37.7	48.4	39.3	56.37	18.87	61.2	9.83	45.83	10.79	2.32	9.91	1.48	9.72	1.93	5.72	0.79	5.72	0.87	2.25	1.13	0.2	0.05
394AM42	122	92.8	7659	459	152	3776	36.5	53	43.7	54.2	21.4	68.65	11.12	51.21	12.26	2.38	11.26	1.56	10.2	2.03	5.85	0.8	5.52	0.93	2.26	1.02	0.21	0.1
394AM43	43.5	102.8	6921	471	174	3598	21	70.8	32.8	31.13	18.64	63.8	11.17	54.61	15.12	2.2	14.9	2.18	13.97	2.81	7.61	1.09	7.18	1.01	2.25	1.27	0.15	0.08
394AM44	48.1	96.1	8597	442	53	4219	48.3	52.2	51.7	75.53	17.72	56.96	9.64	45.54	11.68	2.23	10.73	1.52	9.8	2.03	5.83	0.83	5.67	0.85	2.4	1.51	0.26	0.21
394AM52	71.6	97.5	13046	546	96	3757	74.2	55.8	67.1	134.35	21.47	63.86	10.62	49.59	13.25	2.68	11.96	1.65	10.95	2.09	6.33	0.83	6.19	0.91	3.21	1.62	0.35	0.3
394AM53	33.7	131	4848	372	77	4244	7.6	232.2	23.9	5.92	10.08	45.64	9.99	59.21	23.67	1.5	28.11	5.06	35	7.66	24.37	4.12	30.43	4.51	3.81	1.41	0.14	0.18
394AM54	60.8	93.9	12611	500	123	3601	66.8	60.7	70.2	145.25	21.96	69.14	11.71	57.42	14.02	2.6	12.81	1.85	11.91	2.27	6.78	1	6.33	0.93	3.47	1.06	0.23	0.06
394AM55	37.4	116.5	3878	351	77	4018	4.4	103.9	15.1	1.46	5.71	28.27	6.49	37.54	14.66	1.62	16.06	2.62	17.01	3.63	11.62	1.74	13.07	2.07	2.48	1.2	0.06	0.13
394AM57	49.3	123.8	8287	428	162	4084	42.3	67.6	55.9	64.92	25.91	74.31	12.72	61.39	14.71	2.81	13.76	2.08	12.93	2.53	7.85	1.15	7.53	1.21	3.11	1.04	0.28	0.08
397PX11	18.9	122.7	978	199	471	4127	19.2	15.4	19.8	0.91	4.35	14.19	2.29	10.51	3.53	0.57	3.65	0.54	3.37	0.65	1.87	0.25	1.83	0.28	0.96	0.59	0.24	0.2
397AM12	28.7	87.2	7504	453	131	3237	33.3	35.3	42.1	53.6	23.03	69.83	9.48	38.94	8.15	2.18	7.04	0.97	6.54	1.3	4.18	0.6	4.73	0.7	2.44	1.66	0.41	0.13
397PX13	16.5	133.5	955	136	92	4447	15.9	23.8	14.8	0.49	5.17	18.48	3.19	15.99	4.68	0.78	4.91	0.81	5.3	0.97	2.74	0.37	2.58	0.39	0.82	0.53	0.14	0.05
397AM14	34.4	98.5	9320	470	147	3350	41	52.8	52.9	93.74	26.12	84.45	13.02	57.04	12.09	2.52	11.06	1.52	9.55	1.92	5.89	0.91	6.4	0.96	3.07	1.66	0.36	0.12
397AM21	38.1	81.9	3447	346	937	2251	17.3	24.7	18.1	42.93	5.99	19.26	2.85	13.59	4.22	0.98	4.72	0.72	5.17	0.95	2.73	0.4	2.52	0.31	0.76	0.48	0.11	0.1
397AM22	37.1	129	9852	411	146	3109	38.2	78.9	51	73.57	25.96	90.38	15.21	71.24	18.22	2.87	16.65	2.31	14.81	2.79	8.65	1.3	8.04	1.17	3.29	1.44	0.29	0.18
397AM23	32.9	81.8	7287	438	94	3256	37.7	35.7	49	73.01	25.94	76.94	11.16	44.26	8.66	2.3	7.26	1.01	6.63	1.38	3.79	0.66	4.73	0.69	2.7	1.68	0.48	0.09
397AM24	31.9	117.1	4690	467	591	2572	16.5	27.8	25.3	18.99	8.53	28.03	4.53	20.22	5.45	1.51	5.55	0.81	5.88	1.02	3.18	0.47	3.2	0.51	1.84	1.06	0.16	0.38
397AM31	38.8	152.9	11653	472	68	3385	45.9	130.3	59.4	92.52	33.34	117.45	21.07	107.35	28.12	3.59	26.81	3.89	25.13	4.76	13.72	1.98	12.92	1.77	3.69	1.34	0.26	0.09
397AM32	39.2	196.7	12004	497	66	2867	47.1	161.9	59.5	125.34	29.55	112.86	21.55	118.47	36.47	3.81	36.77	5.48	33.15	6.44	17.42	2.37	13.38	1.74	3.33	1.5	0.36	0.11
397AM33	34.2	115.9	9897	491	137	3075	43.8	67.4	53.1	97.83	25.42	89.03	14.44	67.41	15.28	2.92	14.25	1.99	12.36	2.41	7.45	1.1	7.55	1.21	2.8	1.45	0.3	0.09
397AM41	39.6	108.3	8522	441	103	3046	39.9	74	52.5	94.41	26.04	85.53	14.18	67.63	15.85	3.01	15.82	2.2	13.77	2.68	8.1	1.17	7.7	1.07	2.92	1.34	0.29	0.15
397PX51	38.2	158.9	1094	172	81	4154	18.1	36.5	19.3	0.91	5.21	20.82	4.11	21.51	7.26	0.92	7.3	1.11	7.33	1.45	4.23	0.61	3.49	0.58	0.94	0.45	0.14	0.04
397AM52	49	166.9	11377	476	83	3193	43.2	150.6	55.3	80.14	30.15	115.14	21.17	110.89	30.89	3.7	31.77	4.73	28.75	5.88	16.35	2.25	13.15	1.84	3.09	1.43	0.26	0.08
397AM53	44	86.5	6239	430	86	3015	32.2	38.8	41.3	50.43	22.89	67.58	9.56	39.53	8.01	2.21	7.74	1.18	6.89	1.45	4.38	0.68	4.71	0.71	2.54	1.43	0.46	0.2
397PX62	36.3	174.7	807	178	71	4215	19.5	30.4	15.4	0.63	4.94	18.71	3.69	18.62	6.28	0.78	6.05	1	6.15	1.25	3.82	0.56	3.36	0.59	0.79	0.68	0.11	0.19
397AM63	46	127.6	7572	397	368	2829	27.9	57.8	25.2	66.01	15.99	58.44	9.87	45.5	12.12	2.15	12.18	1.76	11.01	2.1	6.49	0.91	5.74	0.79	1.75	1.14	0.18	0.11
397AM64	48.1	95.4	7449	516	156	3131	35.8	37.6	45.8	73.53	27.73	81.84	10.91	43.05	8.54	2.59	6.87	1.12	6.62	1.38	4.16	0.67	4.65	0.81	2.85	1.92	0.51	0.23
397AM65	61.9	138	6263	514	1663	2756	23.3	36.1	26.6	230.66	13.14	47.44	7.59	35.8	8.25	1.9	7.43	1.11	6.91	1.28	3.84	0.62	3.68	0.45	1.89	1.63	0.11	0.3
397AM71	47.6	55.6	3738	288	133	2935	18.8	22	25.5	15.26	15.43	42.89	5.74	22.12	4.3	1.5	3.81	0.59	3.71	0.82	2.38	0.41	3.11	0.48	1.45	0.95	0.28	0.22
397AM72	53.9	92.7	7024	417	148	3055	27.8	49	38.1	57.17	17.84	60.96	9.95	46.42	11.46	2.51	10.13	1.39	8.77	1.69	5.26	0.78	4.9	0.73	2.66	1.27	0.24	0.32
397AM81	42.5	83.7	7017	432	98	3205	35.5	37.1	48	67.12	24.25	77.3	11.06	44.8	8.58	2.28	7.24	1.01	6.53	1.38	4.02	0.68	4.49	0.74	2.64	1.34	0.33	0.36
397PX91	21.1	141.3	998	193	79	4987	17.6	28.7	16.4	bdl	5.47	22.24	3.99	19.8	5.76	0.88	5.82	0.88	5.8	1.17	3.3	0.49	3.12	0.53	0.88	0.49	0.08	0.06
397AM93	28.7	68.6	5941	425	158	3155	31.2	33.7	34.9	58.13	23.17	75.69	10.15	40.79	8.09	2.25	6.92	0.99	5.83	1.22	3.62	0.55	4.26	0.59	2.12	1.41	0.39	0.13
397AM94	31.6	120.9	9409	509	161	3272	41.8	70.2	47.4	101.69	23.37	91.44	14.41	65.85	15.76	2.9	14.3	1.98	12.83	2.63	7.86	1.18	7.75	1.05	2.64	1.41	0.32	0.12
397AM103	31.5	109.8	8909	434	115	3528	33.7	69.5	44.9	59.49	23.65	90.3	14.2	67.34	16.75	2.53	15.36	2.12	13.13	2.54	7.23	1.08	7.69	1.02	2.47	1.43	0.3	0.18
471AM11	61.7	132.6	15337	528	159	2189	77.3	93.3	99.1	213.45	26.03	85.77	15.75	77.65	20.42	3.45	20.45	2.85	18	3.47	10.18	1.45	9.37	1.4	4.4	1.26	0.23	0.07
471AM12	30.7	138.7	5249	389	107	3379	10.1	84.4	28.7	1.58	22.7	76.14	13.28	64.78	18.07	1.9	18.38	2.57	16.39	3.34	9.36	1.32	7.88	1.17	2.51	0.79	0.16	0.05
471AM21	33.3	82.1	7121	428	161	3483	38.1	45.2	42.6	57.03	19.02	65.43	9.77	42.96	10.55	2.12	9.4	1.34	8.63	1.77	5.36	0.73	5.08	0.72	2.43	0.84	0.21	0.05
471AM22	34.4	91	7084	426	112	3923	34.4	49.2	42.2	54.34	18.31	65.09	9.96	44.57	11.05	2.27	10.33	1.42	9.08	1.9	5.63	0.85	5.76	0.89	2.14	1.09	0.22	0.21
471AM31	60.9	145.6	16311	531	120	2185	82.5	99.5	104	224.85	25.93	85.44	16.13	79.6	21.62	3.55	22.39	3.21	19.4	3.82	10.81	1.55	9.88	1.28	4.83	1.36	0.21	0.09
471AM32	65.4	92.7	10046	409	141	3801	55.7	57.8	61.6	93.79	21.71	66.66	11.22	50.93	12.43	2.48	11.41	1.8	10.75	2.13	6.38	1	6.44	0.92	3.42	0.95	0.34	0.04
471AM51	26.5	103.7	5682	399	180	3586	16.5	65.3	28.6	28.36	16.1	62.05	10.4	48.63	13.71	1.78	13.36	1.93	12.56	2.5	7.21	1.02	6.81	0.97	2.16	1.13	0.15	0.11
471AM52	55.3	99.2	10364	488	160	3825	55.5	56.7	63.5	155.86	22.95	75.01	11.89	51.95	12.81	2.64	11.31	1.67	11.05	2.23	6.62	0.95	6.6	1.09	2.97	1.82	0.36	0.31
471AM53	35.7	95.6	8357	452	154	3846	44.2	56.1	46.1	93.35	19.44	68.01	10.72	49.33	12.22	2.31	11.31	1.73	10.77	2.23	6.55	0.9	6.63	1	2.37	1.27	0.2	0.15
471AM54	39.9	83.6	9412	446	167	3891	54.9	45	53	106.38	18.15	60.21	9.31	41.46	9.82	2.15	9.58	1.34	8.51	1.67	5.11	0.72	5.11	0.79	2.46	1.4	0.2	0.16
471AM61	67.6	92.6	12154	423	154	2656	59.6	53.6	66.4	158.82	23.32	76.75	12.56	55.98	13.21	2.38	10.8	1.67	9.51	2.12	5.86	1.01	6.42	0.98	2.77	1.09	0.22	0.07
471AM62	50.3	95.6	7106	434	163	3568	37.6	52.4	38.4	55.48	22.19	72.74	11.28	51.04	12.35	2.54	11.52	1.68	10.22	1.93	5.62	0.81	5.21	0.79	2.37	1.07	0.21	0.08
471AM71	47.2	91.5	11888	448	200	3348	62.4	51.6	62.8	130.42	18.79	62.85	10.36	48.58	11.82	2.37	11.08	1.53	10.31	2.07	5.75	0.84	5.62	0.74	3	1.6	0.25	0.14
471AM72	35.4	88.9	6989	385	147	4000	29.9	57.5	41	46.24	19.73	68.78	11.19	51.01	13.1	2.18	11.55	1.7	10.7	2.14	6.68	0.98	6.8	0.97	2.29	1.34	0.26	0.18
471AM81	56.9	85.3	9187	370	58	3703	49.6	54.3	56.8	71.73	18.81	57.13	9.64	45.75	11.18	2.35	10.66	1.49	10.23	2.01	5.98	0.82	6.24	0.82	3.08	0.84	0.18	0.07
471AM82	60.5	114.8	7148	412	139	3653	32.6	64.6	46.4	52.29	22.38	69	11.5	55.99	14.16	2.41	13.63	1.94	12.09	2.3	6.81	1.06	7.11	0.97	2.63	1.35	0.3	0.18
687AM11	36.3	74	6960	456	204	3158	36.9	37.1	31.5	57.85	16.41	60.67	8.87	38.88	9.34	2.1	8.48	1.19	7.34	1.43	4.11	0.63	4.4	0.62	1.58	1.11	0.16	0.06
687AM12	35.7	64.6	8949	442	111	3130	44.1	35.8	40.7	72.22	14.27	54.74	8.01	34.49	8.8	1.89	8.15	1.12	6.81	1.42	3.87	0.56	3.69	0.59	2.02	1.07	0.15	0.07
687AM13	111.2	70.8	10777	519	153	2643	56.2	38.8	51	139.89	15.43	59.78	8.68	37.54	9.15	2.08	8.57	1.24	7.62	1.53	4.36	0.62	4.42	0.63	2.26	1.45	0.2	0.13
687AM14	42.1	103.1	11439	601	134	2826	49.7	68.4	59.8	183.61	19.74	81.04	13.27	63.29	17.12	2.64	16.53	2.33	13.94	2.66	7.44	1.05	6.77	0.9	2.5	1.66	0.17	0.13
687AM21	48.2	91.8	8765	523	152	2883	43.1	59.8	53.3	70.3	15.04	60.66	10.02	50.06	13.31	2.11	13.65	1.95	12.15	2.38	6.66	0.91	5.7	0.79	2.67	1.1	0.12	0.04
687AM22	53.3	90.1	10271	505	155	3462	57.4	45.8	53.5	141.44	18.03	64.23	10.11	46.93	10.96	2.2	10.2	1.45	8.93	1.82	5.14	0.71	4.77	0.73	2.71	1.23	0.18	0.08
687AM23	159.6	78.8	6863	414	114	2991	22.1	49.9	32.9	40.69	11.81	46.51	8.14	39.48	10.5	2.03	10.38	1.59	9.55	1.93	5.57	0.84	5.8	0.89	2.27	1.34	0.13	0.13
687AM24	47.6	79	11003	466	180	3001	58.2	46.9	56.8	135.1	18.25	62.77	10.24	46.33	11.27	2.28	10.39	1.52	9.19	1.81	5.38	0.76	4.84	0.68	2.69	1.05	0.15	0.06
687AM25	301.9	96.7	11087	511	127	3265	71.5	46.7	57.9	125.78	18.54	56.44	8.91	41.79	10.3	2.64	9.92	1.44	9.18	1.83	5.44	0.78	5.41	0.79	2.44	1.45	0.36	0.16
687AM26	36.5	76.1	7201	423	185	3151	36.9	43.1	35.6	52.8	16.9	57.6	8.93	41.06	9.86	2.07	9.36	1.31	8.17	1.6	4.75	0.7	4.56	0.61	1.85	1.03	0.16	0.07
687AM27	47.2	91.2	6206	449	189	3070	32.1	49.6	33	60.4	19.63	65.95	10.23	47.31	11.63	2.3	10.98	1.52	9.55	1.9	5.66	0.81	5.36	0.82	1.88	1.62	0.22	0.16
687AM31	55.1	71.9	9611	534	120	3212	61.9	27.3	39.8	131.68	11.55	38.3	5.38	24.5	6.71	1.63	5.84	0.87	5.39	1.06	3.04	0.44	2.96	0.42	1.91	1.64	0.17	0.11
687AM32	42.4	65.8	8897	448	110	3248	43.7	35.7	43.9	71.39	14.95	55.32	8.15	36	8.56	1.98	7.66	1.07	7.1	1.37	4.07	0.57	3.93	0.6	1.99	1.35	0.16	0.11
687AM33	38.5	67.9	7516	411	152	3187	38.1	38.1	37.6	58.04	15.96	60.94	9.03	39.53	9.07	1.97	8.23	1.15	7.31	1.43	4.28	0.59	3.91	0.54	1.94	1.02	0.17	0.06
687AM34	48	83.4	7792	481	199	3285	57.7	37.2	38	92.94	14.82	54.93	7.88	34.99	8.18	2.16	7.61	1.09	6.93	1.37	4.43	0.65	4.53	0.67	2.07	1.32	0.17	0.09
687AM41	61.3	90.3	11448	491	128	2830	52.3	58.6	55.7	124.46	20.63	72.69	11.89	55.97	13.89	2.43	12.99	1.86	11.11	2.23	6.33	0.92	5.83	0.86	2.83	0.89	0.19	0.04
687AM42	58.5	77.8	8628	444	140	3195	42.5	47.4	44.7	73.66	17.36	59.36	9.39	43.48	10.79	2.12	10.11	1.48	9.44	1.79	5.27	0.72	4.87	0.71	2.25	0.96	0.17	0.04
687AM43	66.7	92.4	8097	493	260	3311	53.3	43.5	43.9	85.85	15.67	53.81	8.32	38.4	9.15	2.22	8.77	1.32	8.45	1.66	4.97	0.73	5.25	0.79	2.34	1.1	0.19	0.07
687AM44	72.2	82.1	6893	409	318	3475	49.6	29.7	39.8	58.46	11.95	38.84	5.85	26.79	6.69	1.7	6.09	0.86	5.54	1.11	3.33	0.55	3.91	0.63	2	0.88	0.17	0.06
687AM45	61.3	82.6	9178	442	105	3493	46.9	51.8	52.9	102.06	18.66	63.77	10.12	46.45	11.73	2.45	10.59	1.56	10.13	2	5.72	0.85	5.77	0.83	2.74	1.21	0.17	0.1
687AM46	60.4	103.7	5636	396	128	3239	21.8	73.6	25.1	25.53	12.4	50.27	9.15	46.36	13.93	1.72	13.33	2.15	13.57	2.75	8.22	1.22	8.62	1.22	2.33	1.14	0.19	0.09
687AM51	55.5	65.1	7502	413	119	3182	38	37.8	36.7	73.72	15.84	58.82	8.86	37.85	9.53	1.97	8.16	1.16	7.75	1.44	4.16	0.64	4.21	0.59	1.85	1	0.14	0.06
687AM52	54.5	69.9	9323	456	123	3285	49	37.3	43.8	138.25	16.23	59.79	8.87	39.17	9.07	2.05	7.89	1.15	7.24	1.43	3.97	0.59	4.32	0.57	2.15	1.18	0.2	0.09
687AM53	54.5	73.2	7043	448	170	3164	33	41.4	31.6	67.67	14.8	59.16	8.97	39.98	9.77	2.11	8.6	1.29	8.15	1.59	4.63	0.69	4.83	0.64	1.9	1.51	0.16	0.18
687AM61	53.8	70.8	11145	534	146	2587	65.5	36.4	49.5	158.96	15.01	57.4	8.8	39.42	9.18	2.03	8.21	1.19	7.41	1.45	4.25	0.59	3.98	0.56	2.25	1.14	0.18	0.06
687AM62	65	68.8	10349	482	145	3243	52.6	36.8	49.9	108.84	14.58	54.56	8.16	36.52	8.53	1.99	7.62	1.1	7.28	1.48	4.05	0.61	4.24	0.6	2.22	1.14	0.17	0.11
687AM63	42.7	76.2	7002	455	179	3203	37.5	39.5	31.6	58.85	16.59	63.33	9.19	40.61	9.74	2.17	8.87	1.27	7.84	1.54	4.55	0.65	4.45	0.59	1.74	1.09	0.15	0.06
687AM71	28.6	68.9	3529	320	75	3225	7.5	28.7	16.9	4.65	8.77	39.42	6.23	27.79	6.36	1.43	5.26	0.74	5.11	1.01	3.46	0.57	4.07	0.58	1.47	0.97	0.15	0.14
Late granite
377AM11	28.9	198.8	4740	276	158	8609	9.7	23.4	21.8	6.3	14.08	41.57	5.05	19.64	4.06	0.78	3.92	0.58	3.46	0.74	2.37	0.38	3.03	0.55	2.15	0.94	0.03	0.04
377AM12	40.4	94.9	8307	454	177	8365	41.8	46.6	46.4	84.47	19.4	68.99	10.32	46.01	10.39	2.22	9.31	1.44	8.7	1.77	5.23	0.76	5.3	0.75	2.54	1.85	0.29	0.13
377AM13	31	162.9	5245	256	215	8150	8.9	33.4	23.3	6.56	15.68	53.36	7.43	30.95	7.31	1.21	6.73	0.99	5.8	1.12	3.54	0.51	3.65	0.66	2.86	1.32	0.09	0.09
377AM21	31.7	104.9	4485	198	33	6985	14.8	13.4	15.3	23.41	8.95	25.5	3.44	13.93	3.91	0.99	3.34	0.49	2.72	0.43	1.35	0.17	1.3	0.17	1.15	0.64	bdl	bdl
377AM22	34.1	102.8	5798	236	72	5732	23.3	25.1	19.7	38.73	11.73	41.51	6.61	29.63	7.3	1.58	7.09	0.9	4.99	0.9	2.49	0.31	1.91	0.27	1.49	0.89	0.11	bdl
377AM24	40.8	101.8	6614	202	9	6952	24.1	17	32.7	46.26	14.14	39.86	5.73	23.39	4.75	1.22	4.37	0.46	2.98	0.61	1.63	0.23	1.63	0.25	2.04	0.78	bdl	bdl
377AM31	29.1	140.5	2940	121	44	8867	6.7	52.1	13.3	1.63	7.17	37.04	6.75	32.72	9.41	1.12	9.48	1.25	8.25	1.6	4.95	0.68	5.69	0.89	2.6	1.26	0.08	0.06
377AM32	27	120.6	5485	245	7	8022	16	15.3	18.4	43.34	11.34	39.7	5.43	22.73	5.04	1.26	4.4	0.6	2.98	0.52	1.52	0.22	1.51	0.27	1.47	1.04	bdl	0.04
377AM41	31	185.8	4339	132	17	8253	8.5	30.5	16.4	5.83	11.28	41.26	6.3	30.22	8.43	1.28	7.84	1.04	5.94	1.08	2.88	0.38	2.42	0.37	1.27	0.79	bdl	bdl
377AM42	29.7	84.6	6387	199	16	8241	15.7	18.7	22.8	56.65	16.11	45.78	5.74	22.9	4.43	0.93	3.79	0.54	3.21	0.63	1.79	0.28	1.94	0.36	1.63	0.95	bdl	bdl
377AM43	32.1	104.3	6218	193	8	8184	20.3	19.5	21.5	51.32	14.82	45.22	5.82	23.3	4.81	1.13	4.05	0.52	3.57	0.64	1.89	0.27	2.14	0.35	1.45	1.08	bdl	0.02
377AM71	28.8	231.4	3323	120	43	8398	9.1	11.4	16.8	8.27	9.24	21.22	2.49	9.69	1.78	0.62	2.11	0.25	1.61	0.36	1.13	0.19	1.59	0.33	1.26	1.46	0.88	0.1
377AM72	20.6	209.1	2538	96	31	8113	7.5	11.8	10.6	1.57	7.48	18.96	2.4	9.28	1.99	0.53	1.9	0.24	1.63	0.36	1.05	0.18	1.56	0.31	1.57	0.95	0.11	0.06
Dacitic roof dikes
693AM105	110.62	36.2	19786	427	81	1906	226.1	28.8	37.4	177.58	5.87	22.38	4.06	23.02	7.12	2.15	6.28	0.9	5.97	1.16	2.99	0.4	2.67	0.34	1.85	0.95	0.16	0.03
693AM71	43.13	75.2	9543	406	118	2568	55.2	41.5	52.9	94.56	16.09	54.84	8.91	43.76	10.29	1.98	9.01	1.44	8.78	1.56	4.5	0.69	4.37	0.66	2.68	0.86	0.13	0.04
693PX41	50.55	124.6	4660	419	885	1145	37.4	13.1	18	bdl	1.42	5.53	1.18	7.35	2.85	0.88	3.36	0.52	3.1	0.58	1.57	0.18	1.22	0.16	0.99	bdl	bdl	bdl
693PX42	48.79	86	2840	273	531	1347	30.1	9	8	0.19	0.84	3.57	0.79	4.8	1.72	0.61	2.12	0.33	2.2	0.41	1.03	0.12	0.75	0.11	0.44	0.12	bdl	0.02
693AM81	85.12	176.3	21721	1509	104	1173	253.9	30.1	38.3	137.88	3.33	14.05	2.88	17.12	6	2	7.19	1.02	6.5	1.23	3.53	0.48	2.61	0.3	1.91	0.6	0.08	0.02
693PX91	42.41	118.6	2606	518	385	1560	31.4	10.3	7.8	0.62	0.92	3.64	0.81	5.18	1.79	0.55	2.19	0.3	2.22	0.38	1.24	0.15	0.95	0.14	0.38	0.28	0.03	0.27
693PX92	43.39	120	3455	887	611	1801	27.9	13.6	11.2	0.09	1.05	4.27	1	6.62	2.35	0.58	3.03	0.44	3.08	0.56	1.67	0.23	1.23	0.2	0.62	0.1	0.02	0.06
693AM93	41.16	137.2	2894	544	396	2987	8.3	13.9	25	4.58	7.38	19.92	2.87	11.96	2.84	0.72	3.33	0.43	2.88	0.55	1.53	0.24	1.26	0.16	0.98	0.5	0.3	0.15
693AM61	46.84	90.2	7978	445	170	3273	41.8	48.1	44.3	54.56	17.6	57.64	9.24	45.42	10.36	2.29	10.47	1.53	8.84	1.85	5.46	0.82	5.49	0.75	2.52	0.87	0.25	0.1
693AM62	110.37	121.2	21396	786	86	1710	198.8	50.4	64.3	171.64	9.91	35.08	6.64	38.17	11.02	2.78	11.65	1.75	10.74	2.04	5.83	0.76	4.6	0.6	2.97	1.02	0.14	0.04
693AM11	46.24	96.5	9381	411	57	2637	44.7	66.5	53.8	80.14	21.84	74.51	12.47	62.98	15.42	2.32	14.55	2.01	13	2.58	7.87	1.07	6.94	0.95	2.87	0.87	0.19	0.04
693AM12	57.6	79.9	7552	399	155	3279	41.8	48.1	46.5	63.44	19.17	61.41	9.6	44.69	10.73	2.17	9.7	1.41	9.61	1.92	5.2	0.73	4.9	0.75	2.59	0.72	0.23	0.07
693AM13	47.31	85	7212	391	135	3438	38.4	50.5	42.6	51.87	19.15	62.55	9.94	47.33	10.44	2.12	10.13	1.54	9.41	1.82	5.72	0.77	5.85	0.76	2.4	0.81	0.24	0.08
693AM51	157.14	119.6	10823	563	73	3175	57.7	47.8	56.3	90.54	21.14	60.14	9.56	45.52	10.66	2.53	9.84	1.52	9.6	1.88	5.23	0.74	5.21	0.73	2.71	0.9	0.28	0.05
693AM52	58.89	82.8	8612	405	170	3339	45.9	51.1	43.5	53.47	18.7	59.13	9.58	47.34	11.38	2.4	11.37	1.52	10.2	1.89	5.97	0.84	5.23	0.79	2.28	0.87	0.23	0.04
693PX21	40.77	75.3	1688	335	3058	1271	33.2	5.9	5.1	0.13	0.62	2.34	0.52	2.92	1.02	0.37	1.7	0.19	1.25	0.2	0.69	0.09	0.6	0.08	0.19	0.25	0.35	0.11
693AM31	59.09	35.2	11318	176	541	3348	60.9	22.7	25.8	45.01	5.29	13.8	1.94	10.95	4.98	1.48	5.72	0.9	5.51	0.87	2.21	0.29	1.85	0.19	1.01	1.04	0.09	0.06
693AM32	46.02	87.4	6738	388	176	3414	39.2	44.9	35.2	50.06	16.57	59.57	9.29	41.77	10.49	2.09	9.23	1.32	8.52	1.66	4.72	0.74	4.71	0.69	1.98	0.79	0.25	0.06
693AM33	215.22	98	17684	804	58	1777	159.9	39.2	52.3	114.16	7.71	29.5	5.42	28.22	8.63	2.04	8.67	1.3	7.86	1.56	4.54	0.56	3.63	0.55	2.27	0.75	0.18	0.05
693AM91	96.44	140.2	13475	540	184	2486	80.7	63.5	77.3	165.09	18.96	59.37	10.27	50.48	15.04	2.77	15.19	2.05	13.3	2.44	6.84	0.97	5.99	0.89	3.33	1.35	0.38	0.12
693AM92	57.4	100.4	7090	402	184	3341	36.9	58.1	40	53.34	22.03	69.48	11.52	54.27	13.43	2.59	12.32	1.76	11.64	2.23	6.35	0.9	5.75	0.79	2.24	0.87	0.15	0.05
693AM94	67.8	109.5	12109	459	126	2625	70.5	65.7	72.3	138.84	20.13	64.97	11.5	55.98	15.27	2.67	14.28	2.01	12.63	2.51	7.21	1.02	6.8	0.99	3.05	1.11	0.26	0.06
548AM11	57	86.7	12481	490	147	2162	55.1	50.3	58.2	170.16	21.48	76.16	11.75	53.02	11.55	2.24	10.25	1.41	9.08	1.78	5.42	0.87	5.3	0.88	2.61	1.3	0.19	0.07
548AM12	52.8	88.2	12363	497	95	2370	61.8	49.9	57.8	147.31	18.19	65.16	10.31	47.29	11.43	2.34	10.91	1.6	9.46	1.9	5.7	0.82	5.26	0.76	2.4	1.24	0.22	0.1
548AM14	83.2	77.3	9260	468	113	3325	45.8	46.4	49.6	86.13	20.56	67.42	9.78	42.25	10.43	2.02	9.27	1.43	8.74	1.76	5.36	0.76	5.22	0.74	2.37	1.93	0.6	0.33
548AM21	56.9	76.1	12286	468	164	3008	65.7	45	52.3	141.31	16.12	55.23	8.44	39.01	9.34	2.26	9.79	1.35	8.87	1.76	4.93	0.71	4.84	0.73	2.22	1.97	0.27	0.14
548AM22	46.2	68.3	8207	400	137	3244	35.5	42	39.3	58.34	17.11	62.5	9.3	40.76	9.6	1.84	8.95	1.28	8.12	1.59	4.95	0.67	4.61	0.59	1.89	1.17	0.18	0.11
548AM23	43.9	75.4	7759	443	160	3216	34.5	43.1	38.7	53.36	18.96	66.89	9.75	43.09	9.5	1.95	9.69	1.4	8.14	1.79	4.95	0.65	4.74	0.63	2.04	1.59	0.39	0.21
548AM24	39	89.7	11127	538	96	2702	45.5	60.5	51.7	165.03	22.44	85.42	12.92	60.13	14.51	2.28	12.54	1.8	11.12	2.38	6.75	0.97	6.06	0.87	2.46	1.52	0.41	0.19
548AM25	38.1	77.3	6743	422	158	3334	30	46.2	40.4	47.32	20.46	70.25	10.22	44.73	10.08	1.8	9.74	1.36	8.51	1.74	5.25	0.78	5.34	0.78	2.12	1.4	0.61	0.3
548AM31	51.5	87.6	10185	441	127	2401	41.8	61.6	45.3	106.08	23.27	84.88	13.46	60.76	14.25	2.4	13.28	1.83	11.86	2.32	7.13	1.01	6.83	0.88	2.18	1.02	0.44	0.14
548AM32	53.6	96.8	11889	558	108	2504	53.9	61.3	60.7	137.63	20.94	75.68	12.31	56.4	14.07	2.58	12.76	1.97	11.64	2.42	7.14	1.02	6.25	0.95	3.14	1.27	0.22	0.07
548AM33	88.4	81.6	8359	456	191	3272	44.4	48	47.5	73.42	19.45	64.7	10.08	45.03	11.11	2.27	10.42	1.41	9.13	1.78	5.63	0.74	5.08	0.68	2.22	1.45	0.29	0.14
548AM34	46.1	83.4	8410	453	169	3566	39.5	51.2	53.7	74.15	23.85	73.3	11.2	48.94	12.12	2.29	10.77	1.57	9.51	1.89	5.92	0.84	5.56	0.86	2.72	1.45	0.61	0.29
548AM41	39.6	79.7	10133	508	128	2509	50.3	47.9	50.5	92.97	17.7	64.56	10.13	46.04	10.88	2.15	10.2	1.51	9.42	1.81	5.61	0.76	5.27	0.76	2.48	1.64	0.27	0.16
548AM42	51.4	74.6	14165	539	168	2442	79.6	38.8	63.4	198.27	16.04	56.91	8.74	39.48	9.52	2.23	8.37	1.19	7.54	1.47	4.53	0.65	4.26	0.63	2.81	1.52	0.17	0.1
548AM43	37.6	71.7	6993	419	156	3393	36.6	41	38.7	57.23	17.67	61.82	9.23	39.95	9.62	1.95	8.94	1.26	7.89	1.58	4.66	0.71	4.43	0.72	2.06	1.1	0.2	0.15
548AM51	46.7	90.6	13631	672	166	2186	73.2	53.8	71	196.77	18.48	71.81	11.25	53.26	13.25	2.54	10.76	1.66	10.72	2.04	6.02	0.88	5.92	0.78	2.96	1.67	0.22	0.12
548AM52	36.4	65.9	9094	446	171	2912	46.4	39.4	43.9	86.98	16.45	60.33	8.99	40.31	9.2	1.95	8.72	1.19	7.84	1.47	4.28	0.63	4.23	0.55	2.17	1.14	0.19	0.07
548AM53	62.3	76.8	6657	425	137	3285	33.6	42.2	35.1	47.75	16.65	64.04	9.36	41.88	9.69	1.95	8.99	1.26	8.2	1.61	4.82	0.68	4.19	0.66	1.84	0.89	0.22	0.13
548AM54	36.3	71.4	8621	433	158	3168	41.1	41.4	45	83.41	19.29	67.3	9.4	42.2	9.57	1.81	8.73	1.21	8.28	1.53	4.69	0.67	4.49	0.72	2.04	2.28	0.75	0.29
548AM61	59.4	145.9	13990	533	89	2740	71.4	85.7	83.9	174.51	20.9	76.91	13.7	73.49	19.94	3.1	19.33	2.69	17.41	3.36	9.42	1.2	7.52	1	3.97	1.65	0.27	0.08
548AM62	33.6	80.4	9102	422	111	3373	35.1	58.1	48.6	66.65	27.04	91.92	13.73	62.09	13.81	2.14	11.79	1.77	11.04	2.14	6.77	0.92	5.89	0.8	2.5	1.54	0.66	0.19
548AM63	53	83.3	7651	443	184	3405	38.8	46.8	43.7	59.96	19.51	65.26	10.05	45.07	10.99	2.06	8.99	1.39	8.96	1.8	5.06	0.72	5.38	0.78	2.33	1.11	0.29	0.13
548AM64	98	81.6	8627	452	190	3344	40.9	57.8	47.9	77.5	25.5	76.81	11.66	51.62	11.76	1.95	11.49	1.61	10.96	2.14	6.58	0.92	6.23	0.95	2.58	1.32	0.39	0.29
551AM11	42.8	82	6827	402	94	3344	36.2	41.7	34.7	55.26	16.66	60.64	9.04	39.5	9.75	2.07	8.56	1.31	7.99	1.59	4.91	0.68	4.51	0.64	1.78	1.07	0.22	0.08
551AM12	37.9	92.7	6565	433	167	3406	30.9	44	29.3	49	19.01	70.03	10.47	47.23	11.35	2.3	10.23	1.46	8.78	1.83	4.76	0.68	4.54	0.62	1.67	0.97	0.15	0.04
551AM13	60	85.7	8222	432	209	3742	57.3	43.4	35.1	66.96	17.17	63.09	9.96	45.39	10.75	2.35	10.28	1.42	8.62	1.67	4.87	0.72	4.63	0.65	1.93	1.04	0.21	0.09
551AM21	30.4	82	6047	399	187	3475	27.6	47.9	26.3	41.51	20.17	79.15	11.97	54.72	13.4	2.25	11.89	1.67	10.31	1.83	5.2	0.67	4.56	0.61	1.41	1.04	0.21	0.08
551AM22	34.7	76.4	6018	416	188	3536	26.4	53.6	27.5	37.9	22.64	87.95	13.47	60.85	14.89	2.36	13.32	1.87	11.3	2.14	5.92	0.79	5.05	0.73	1.66	0.83	0.16	0.06
551AM23	29.4	101.2	5332	339	126	3596	24.5	50.8	23.5	35.05	21.22	81.73	12.83	57.24	14.52	2.15	12.2	1.79	10.51	1.97	5.72	0.8	4.78	0.59	1.51	0.78	0.12	0.04
551AM51	37.7	82.2	6783	411	192	3196	33.1	44.8	30	45.89	18.53	68.56	10.52	47.47	11.78	2.25	10.09	1.47	9.08	1.74	4.99	0.72	4.66	0.61	1.69	0.81	0.12	0.04
551AM52	28.8	84.5	5489	370	180	3429	24.9	44	21.9	35.06	18.6	70.72	10.9	48.21	12.11	2.05	11.01	1.41	9.15	1.79	4.9	0.6	4.61	0.58	1.35	0.83	0.14	0.02
551AM53	40.7	83.2	6178	392	177	3703	32.7	44.9	27	42.53	18.7	70.71	10.74	48.95	12.04	2.11	10.2	1.54	9.12	1.67	5.08	0.72	4.62	0.57	1.71	0.87	0.14	0.04
551AM54	29.1	82.8	6206	385	194	3593	30.6	42.2	27.1	37.93	17.27	66.1	9.71	44.73	10.85	2.19	9.59	1.33	8.77	1.59	4.81	0.63	4.27	0.52	1.6	0.83	0.24	0.11
551AM61	44.9	104.5	11105	580	107	2584	53	67.8	56.6	181.94	21.66	82.16	13.41	64.99	15.94	2.53	14.27	2.02	12.74	2.53	7.59	0.99	7	0.99	2.47	1.23	0.17	0.07
551AM62	40.7	61.8	7572	432	170	3025	40.4	45.4	35.9	50.73	18.96	67.37	10.33	48.39	10.53	2.24	9.9	1.42	8.92	1.81	5.23	0.71	4.52	0.62	1.91	1.42	0.57	0.14
Andesitic roof dikes
553PX11	55.01	119.5	4265	612	639	2665	24.7	28.1	21.1	bdl	3.29	14.2	2.68	16.18	4.99	1.04	6.03	0.93	5.68	1.11	3.26	0.44	2.98	0.37	0.9	0.11	bdl	bdl
553PX12	52.53	139.8	4082	462	104	2509	27.4	33.2	27.9	bdl	3.41	16.4	3.44	19	7.1	1.19	7.46	1.11	7.48	1.31	4	0.49	3.43	0.43	1.12	0.09	0.1	bdl
553PX13	43.03	123.6	4234	719	694	2197	25.7	23	18.7	0.14	2.35	10.44	2.18	12.43	4.32	0.89	4.9	0.81	4.71	0.89	2.9	0.37	2.27	0.28	0.82	0.13	bdl	bdl
553PX21	45.73	128.4	3423	340	79	2078	25.4	29.7	24.4	bdl	3.28	13.62	2.91	17.54	6.07	1.19	6.53	0.95	6.38	1.21	3.45	0.44	3.01	0.38	1.09	0.17	0.03	bdl
553PX22	43.06	126.4	3574	310	87	2015	25.8	28.1	23.9	bdl	2.94	12.43	2.62	15.8	5.29	1.08	6.05	0.95	6.11	1.18	3.11	0.41	2.8	0.39	1.13	0.16	0.07	0.02
553PX23	45.14	137.1	3935	392	85	2594	24.6	40.3	32.3	bdl	4.1	18.08	3.86	21.72	7.51	1.29	8.12	1.33	8.4	1.76	4.46	0.58	3.87	0.56	1.39	0.18	0.07	bdl
553PX25	28.94	126.8	3306	385	140	2142	25.2	30.9	24.9	bdl	3.64	14.57	3.08	17.96	6.13	1.11	7.03	1.01	6.37	1.31	3.56	0.51	2.88	0.41	1.1	0.12	0.05	bdl
553PX26	70.19	134.5	3330	339	68	2054	26.5	30.3	26.1	bdl	3.71	14.89	3.1	17.54	5.92	1.09	6.4	0.93	6.37	1.28	3.35	0.47	2.75	0.42	1.16	0.12	bdl	bdl
553PX27	55.74	134.8	3856	358	71	2315	26.1	42.3	39.6	0.42	5	21.46	4.37	24.93	8.24	1.31	8.91	1.5	8.8	1.69	4.95	0.68	4.06	0.6	1.49	0.16	0.07	bdl
553PX31	40.14	107.6	3217	412	813	2137	26.4	21.6	18.4	bdl	2.82	13.17	2.38	13.11	4.54	0.85	4.93	0.74	4.7	0.94	2.53	0.39	2.28	0.3	0.84	0.17	bdl	bdl
553PX32	41.07	110.6	3768	479	506	2275	25.9	25.9	22.4	bdl	3.09	14.34	2.77	15.27	4.86	1.12	5.84	0.83	5.54	1.04	2.85	0.39	2.59	0.4	0.85	0.11	bdl	0.02
553PX33	27.89	100	2360	244	1452	1622	29.1	17.1	15.2	1.74	1.89	8.1	1.66	10.17	3.42	0.76	3.66	0.51	3.61	0.65	2.12	0.28	1.52	0.18	0.62	0.12	bdl	bdl
553PX41	55.08	123.3	4293	666	591	2412	24.5	22.9	17.3	bdl	2.8	11.44	2.27	12.29	4.21	0.98	4.82	0.75	4.5	0.95	2.61	0.41	2.29	0.33	0.76	0.08	bdl	bdl
553PX42	54.47	112.4	3876	524	875	2428	26	27.3	20.5	bdl	3.16	13.67	2.68	15.18	5.17	0.98	5.97	0.93	5.8	1.12	3.03	0.43	2.73	0.41	0.94	0.09	bdl	bdl
553PX43	53.3	111.7	4010	548	569	2282	25.7	20.5	17.4	bdl	2.87	12.41	2.3	12.07	4.1	0.94	4.13	0.71	4.33	0.84	2.22	0.33	2.01	0.29	0.73	0.17	0.05	bdl
553PX44	52.3	125.6	4468	496	135	2548	26	24.4	21	bdl	2.75	13.47	2.55	14.22	4.54	1.1	5.53	0.86	5.27	1.09	2.68	0.44	2.26	0.37	0.83	0.09	0.05	bdl
553PX46	70.43	122.4	3820	470	466	2522	25.3	29	21.6	bdl	3.66	15.84	2.98	17.18	6.02	1.1	6.22	0.9	6.01	1.16	3.35	0.47	2.77	0.5	0.94	0.17	bdl	bdl
553PX47	44.17	95.2	2792	328	688	1674	28.2	14.3	12.4	0.88	1.54	7.12	1.47	8.35	3.14	0.67	3.23	0.51	3.31	0.58	1.69	0.23	1.59	0.17	0.62	0.08	bdl	bdl
553PX51	36.68	113.5	3085	322	393	2301	27	26.2	21.9	bdl	3.24	15.26	2.89	16.58	5.4	0.94	6.02	0.91	5.62	1.11	3.02	0.45	2.65	0.36	0.89	0.09	bdl	bdl
553PX52	45.55	121.8	4116	727	890	2446	25.8	25.1	21.4	bdl	3.04	13.83	2.54	14.65	4.96	0.98	5.41	0.83	5.24	1	2.9	0.39	2.46	0.36	0.92	0.13	bdl	bdl
553PX53	46.68	132.3	3863	430	124	2649	29.6	31.6	26.2	0.19	3.51	16.29	3.25	18.39	6.03	1.28	6.7	1	6.56	1.31	3.54	0.54	3.13	0.49	1.02	0.13	bdl	bdl
553PX61	31.09	118	3649	568	550	2575	26.9	32.2	26.8	0.14	3.78	16.81	3.22	19.07	6.27	1.09	7.42	1.06	7.05	1.22	3.76	0.48	3.18	0.48	1.18	0.15	0.08	bdl
553PX62	25.58	117.9	3401	416	150	2295	26.9	29.3	25.6	bdl	3.82	17.05	3.36	17.71	6.2	1.17	6.79	0.96	6.22	1.24	3.36	0.47	3.02	0.42	1.08	0.12	0.06	bdl
553PX64	29.87	111.4	3304	485	447	2502	25.5	29.5	26.1	bdl	4.21	18.36	3.53	18.53	6.36	1.08	6.58	0.97	6.1	1.17	3.51	0.48	3.08	0.4	1.1	0.14	0.05	bdl
553PX65	30.69	112.9	3141	421	477	2311	26.5	28.4	24.4	bdl	3.82	17.39	3.32	17.79	6.08	1.02	6.1	0.97	5.8	1.18	3	0.45	2.91	0.43	0.94	0.15	bdl	bdl
553PX66	33.26	131.1	3435	469	211	2504	25.9	39.4	34.8	bdl	4.96	22.19	4.55	24.4	7.76	1.3	8.43	1.28	8.3	1.57	4.58	0.65	3.78	0.55	1.42	0.19	0.09	0.04
553PX71	26.14	82	2814	389	1863	1948	27.1	20.5	22.1	bdl	2.96	12.96	2.51	14.45	4.27	0.78	4.51	0.66	4.22	0.77	2.14	0.31	1.92	0.3	0.94	0.11	bdl	bdl
553PX72	21.45	98.1	1981	291	1091	1933	29.4	19.7	16.9	bdl	3.07	13.82	2.51	13.64	4.24	0.8	4.38	0.7	4.11	0.85	2.4	0.3	2.05	0.27	0.64	0.1	0.09	bdl
553PX81	33.54	121.8	3525	464	207	2464	24.5	29.6	23.3	0.22	5.57	21.36	3.71	18.82	6.34	1.01	5.91	0.94	6.21	1.16	3.04	0.45	3.07	0.42	0.99	0.23	0.08	0.06
553PX82	32.75	129.1	3480	460	141	2658	25.4	37.7	28.7	bdl	4.58	20.88	4.05	23.16	7.27	1.08	7.59	1.25	8.27	1.58	4.05	0.6	3.71	0.54	1.22	0.19	bdl	bdl
553PX84	35.41	119.6	4037	517	342	2363	26.5	24.1	20.3	bdl	2.89	12.97	2.49	14.18	5.12	1.04	5.49	0.8	5.12	0.99	2.68	0.35	2.32	0.38	0.91	0.11	0.06	bdl
553PX85	37.13	126.6	4299	655	439	2599	24.2	29.7	24.9	0.2	3.24	15.64	2.94	18.16	5.83	1.06	6.59	0.99	6.29	1.25	3.23	0.41	2.75	0.41	1.15	0.15	0.05	bdl
553PX91	38.37	129.2	3695	370	142	2146	26	36.3	31.1	bdl	4.31	17.68	3.58	21.04	6.55	1.05	7.51	1.24	7.32	1.31	4.06	0.55	3.34	0.55	1.25	0.09	0.07	0.02
553PX92	37.71	129	3994	393	95	2044	26.6	29	25.6	bdl	3.41	13.96	2.8	17.09	5.58	1.12	6.5	0.93	5.56	1.17	3.22	0.44	2.65	0.37	1.07	0.12	0.07	bdl
553PX93	32.97	118.7	3458	367	123	1982	27	25.9	22.4	bdl	2.94	12.65	2.64	15.6	5.04	0.99	6.12	0.88	5.6	1.1	2.86	0.41	2.63	0.35	0.99	0.09	0.05	bdl
553PX94	37.49	137.9	3549	410	101	2541	23.3	44.8	38.2	bdl	4.92	20.33	4.2	26.24	8.39	1.38	9.54	1.51	9.22	1.87	5	0.73	4.35	0.64	1.8	0.18	0.05	0.03
553PX101	40.64	124.6	3665	377	115	2392	26	30.2	23.7	bdl	3.01	13.44	2.81	16.78	5.72	1.14	6.53	1	6.1	1.07	3.43	0.46	2.99	0.41	1.07	bdl	bdl	bdl
553PX102	30.78	136.4	3236	373	68	2216	25.8	31.6	26.8	bdl	3.63	15.5	3.28	19.19	6.63	1.11	7.08	1.07	6.35	1.26	3.69	0.51	3.42	0.42	1.32	0.13	0.08	bdl
555PX1A	0	141.5	3094	453	104	2383	23.7	14.8	10.1	0.1	1.13	4.77	1	6.3	2.45	0.74	3.13	0.48	3.32	0.59	1.79	0.23	1.47	0.2	0.49	0	0	0
555PX1A1	0	141.6	3118	451	101	2395	23.7	14.8	10.1	0.1	1.14	4.78	0.99	6.29	2.41	0.75	3.15	0.48	3.31	0.59	1.82	0.23	1.47	0.2	0.49	0	0	0
555PX1B	0	133.9	4074	582	78	2899	25	26.9	19.5	0.53	2.57	10.5	2.05	12.34	4.48	0.9	5.58	0.81	5.45	1.16	3.19	0.44	3.01	0.42	0.82	0	0	0
555PX1C	0	146.5	3865	502	597	2299	28.4	19.6	15.6	0.16	1.77	7.9	1.5	9.36	3.66	0.95	4.17	0.7	4.2	0.81	2.3	0.33	1.91	0.29	0.85	0	0	0
555PX1D	0	138.7	3045	449	96	2267	24.8	13.9	9.3	0.05	0.84	4.09	0.93	5.85	2.27	0.67	2.75	0.43	2.88	0.56	1.55	0.23	1.4	0.16	0.5	0	0	0
555PX1E	0	139.4	3190	464	95	2299	25.3	14.5	9.7	0.13	1.02	4.37	0.96	6.21	2.17	0.71	2.92	0.45	2.96	0.61	1.62	0.21	1.53	0.19	0.5	0	0	0
555PX1F	0	134.2	4241	552	376	2520	26.8	22.6	16.9	0.13	1.7	7.2	1.62	10.07	3.79	0.89	4.38	0.74	4.84	0.91	2.69	0.34	2.12	0.32	0.82	0	0	0
555PX1G	0	134.4	3516	528	217	2178	27.8	14.2	10.8	0.1	1.17	4.85	0.98	6.06	2.38	0.71	2.97	0.45	3.19	0.57	1.58	0.23	1.35	0.18	0.56	0	0	0
555PX1H	0	130.2	2921	445	642	2166	24.7	13.4	9.6	bdl	0.82	3.75	0.82	5.27	1.97	0.69	2.82	0.44	2.5	0.54	1.49	0.22	1.55	0.18	0.55	0	0	0
555PX1I	0	128.1	3046	471	164	2140	26.8	12.6	8.9	0.24	0.85	3.82	0.85	5.17	2.16	0.68	2.6	0.41	2.67	0.52	1.41	0.21	1.18	0.15	0.45	0	0	0
555PX1J	0	153.4	3826	547	119	2413	25.4	16.8	14	0.07	1.41	5.71	1.25	7.14	2.73	0.79	3.38	0.54	3.62	0.68	2	0.26	1.65	0.26	0.7	0	0	0
555PX1K	0	140	3046	455	105	2489	22.9	15.8	10.4	bdl	1.29	5.54	1.17	6.87	2.69	0.66	2.98	0.51	3.22	0.61	1.86	0.27	1.52	0.22	0.54	0	0	0
555PX1L	0	163.4	4114	579	175	2408	27.5	22.1	17.6	0.15	2.15	9.31	1.81	10.64	3.88	0.93	4.69	0.71	4.66	0.91	2.78	0.39	2.37	0.35	0.84	0	0	0
555PX2A	0	164.6	3812	528	185	2183	29.8	16.7	12.2	0.05	1.07	4.59	1.08	7	2.77	0.78	3.35	0.54	3.44	0.69	1.81	0.26	1.57	0.22	0.7	0	0	0
555PX2B	0	134	2747	264	11	2997	28.2	24.5	17.1	bdl	1.71	7.79	1.76	11.27	4.24	0.96	4.79	0.78	4.96	1	2.82	0.41	2.62	0.31	0.69	0	0	0
555PX2C	0	176.3	3696	473	178	2550	29.7	24.5	17.9	bdl	1.75	7.17	1.67	10.88	3.89	1	5	0.73	5.1	0.99	2.96	0.38	2.33	0.33	0.91	0	0	0
555PX2D	0	148.7	2899	462	130	2289	27.3	15.9	11.5	bdl	1.39	5.15	1.12	6.57	2.67	0.76	3.14	0.51	3.32	0.65	1.85	0.29	1.57	0.22	0.6	0	0	0
555PX2E	0	163.8	3371	450	102	2745	25.6	20.2	14.1	0.81	1.37	5.44	1.24	7.85	3.22	0.84	4.15	0.62	4.09	0.9	2.25	0.34	2.02	0.31	0.61	0	0	0
555PX3A	0	138	4487	531	83	2316	33.3	23.9	20	bdl	1.78	7.42	1.75	10.32	4.49	1.07	4.98	0.74	4.97	1.01	2.7	0.35	2.53	0.34	1.01	0	0	0
555PX3B	0	134	3801	417	76	2135	34.5	16.9	16.2	bdl	1.49	5.92	1.29	8.33	3.07	0.86	3.74	0.53	3.78	0.73	1.99	0.26	1.48	0.22	0.81	0	0	0
555PX3C	0	139.9	3956	365	33	2431	32.9	24.8	22.5	bdl	2.3	9.22	1.95	11.6	4.45	1.15	5.56	0.87	5.07	1.15	2.91	0.4	2.69	0.31	0.93	0	0	0
555PX3D	0	154.6	3328	269	22	2528	34.1	32.1	21.8	bdl	2.7	11.47	2.5	15.52	6.04	1.12	6.76	1.01	7.02	1.36	4.23	0.51	3.37	0.46	1.05	0	0	0
555PX3E	0	147.8	4531	506	96	2628	29.4	27.5	22.8	0.09	2.14	8.16	1.89	11.6	4.64	1.09	6.12	0.88	5.43	1.1	3.22	0.38	2.91	0.38	1.01	0	0	0
555PX3F	0	137.3	4103	497	91	2233	32.1	20.9	16.8	0.32	1.38	5.97	1.39	8.65	3.56	0.91	4.21	0.66	4.38	0.79	2.39	0.31	2.14	0.23	0.83	0	0	0
555PX41	51.2	152.9	3947	340	53	1737	33.2	18.6	15.5	bdl	1.63	6.15	1.35	9.26	3.43	1.03	4.26	0.66	3.84	0.73	2.01	0.31	1.76	0.27	0.79	bdl	bdl	bdl
555PX42	57.1	160.5	4484	337	33	1841	33.5	23.6	21.3	bdl	1.75	7.15	1.58	11.72	4.13	1.21	5.57	0.81	5.31	0.88	2.65	0.45	2.14	0.27	0.97	bdl	bdl	bdl
555PX43	57.1	154.5	4553	323	16	1825	34	26.3	23.7	bdl	1.77	7.17	1.74	12.41	4.68	1.28	6.01	0.81	5.59	1.13	3.1	0.42	2.43	0.39	1.13	bdl	bdl	bdl
555PX44	49.8	142.8	3323	235	36	2193	26.8	33.1	26.8	bdl	2.85	10.66	2.36	15.61	5.06	1.31	6.59	1.02	6.47	1.26	3.74	0.46	3.23	0.45	1.15	0.09	0.25	0.04
555PX45	35.4	134.4	2921	223	20	2159	26.9	20	14.1	bdl	1.15	4.25	1.13	8.33	3.11	0.86	4.14	0.68	4.21	0.85	2.27	0.32	1.96	0.31	0.71	0.06	bdl	bdl
555PX47	47.9	156	3504	220	136	2309	25.9	32.6	25.3	bdl	2.51	9.56	2.19	15	5.43	1.33	6.72	1.05	7.28	1.31	3.71	0.48	3.14	0.47	1.08	0.11	0.07	bdl
555PX49	30.2	164.1	3593	420	106	2203	28.9	20.8	17	2.07	3	7.66	1.58	9.3	3.13	0.89	4.19	0.62	4.23	0.82	2.55	0.35	2.46	0.31	0.72	0.26	0.27	0.05
555PX412	52.2	158	4089	349	30	2113	32.4	23.4	20.5	bdl	1.67	7.19	1.65	10.77	4.52	1.16	4.69	0.8	5.03	1.05	2.48	0.35	2.2	0.29	1.11	bdl	bdl	bdl
555PX51	22.6	143.4	3063	273	38	2048	29.8	20.9	16.4	bdl	1.61	6.57	1.54	10.89	3.94	1.01	4.51	0.69	4.54	0.89	2.85	0.31	1.91	0.27	0.98	bdl	bdl	0.02
555PX52	28.4	126.6	3163	286	123	1981	28.9	26.4	22.9	bdl	2.31	8.67	2.03	13.17	5.04	1.14	5.74	0.91	5.51	1.12	3.26	0.41	2.62	0.37	1.31	0.08	bdl	bdl
555PX54	25	112.1	2708	241	47	1679	27.3	16.3	15.1	bdl	1.37	5.26	1.35	8.5	3.14	0.9	3.69	0.57	3.89	0.71	2	0.23	1.31	0.25	0.73	bdl	0.06	bdl
555PX55	38.5	185.4	3330	352	23	2645	25.2	30.2	19.8	bdl	2.23	7.95	1.9	11.79	4.9	1.13	5.46	0.99	6.44	1.25	3.51	0.49	2.94	0.42	1.14	bdl	0.27	bdl
555PX56	42	154.5	3912	420	62	2587	28.7	31.9	24.8	bdl	2.76	9.66	2.17	14.01	5.04	1.18	6.48	1.01	6.61	1.43	3.64	0.47	3.48	0.47	1.12	0.12	0.29	0.07
555PX57	37	178.4	3316	373	94	2669	23.5	50.3	45.3	5	5.34	18.1	3.84	22.58	7.52	1.07	8.26	1.45	9.96	2.1	5.88	0.87	5.95	0.79	1.89	0.16	0.97	0.11
555PX71	33.5	174.4	3899	645	450	2175	30.1	20.1	14.6	bdl	1.44	5.35	1.31	8.46	3.07	0.75	3.9	0.58	4.14	0.85	2.18	0.32	1.67	0.25	0.58	bdl	0.08	bdl
555PX72	27.3	173.5	4151	634	464	2461	25.4	19.6	15.9	bdl	1.15	4.78	1.11	6.84	3.15	0.93	3.48	0.61	4.21	0.84	2.15	0.33	1.84	0.28	0.87	bdl	bdl	bdl
555PX73	27.5	179	4009	552	236	2492	24.6	21	16.6	6.45	1.15	4.89	1.26	8.23	3.14	0.86	3.48	0.61	4.03	0.8	2.68	0.35	1.91	0.33	0.86	0.15	bdl	bdl
555PX74	19.4	146.6	3651	461	680	1498	27.4	13.1	13.8	bdl	0.84	3.7	0.9	5.6	2.29	0.65	2.42	0.42	2.86	0.57	1.53	0.14	1.49	0.15	0.8	bdl	bdl	bdl
555PX75	19	152.3	3495	442	390	1685	26.9	15.2	14.4	bdl	1.29	4.71	1.05	7.9	2.73	0.79	3.17	0.48	3.1	0.56	1.82	0.17	1.21	0.2	0.72	bdl	bdl	0.06
555PX81	37.4	154.7	2654	302	45	2114	22.1	17.1	11.1	bdl	1.22	5.02	1.18	8.44	3.08	0.72	3.38	0.53	3.35	0.72	1.92	0.19	1.45	bdl	0.58	bdl	bdl	bdl
555PX82	31.6	157.4	3091	375	228	1749	27.7	19.8	16.5	bdl	1.61	6.17	1.46	9.86	3.4	0.9	4.12	0.66	4.11	0.81	2.2	0.24	1.88	0.32	0.89	bdl	bdl	bdl
555PX83	48.4	206.2	4475	637	198	2132	29.5	25.2	19.8	bdl	1.65	6.49	1.56	10.87	4.25	1.1	5.6	0.83	5.01	1.09	3.03	0.39	2.45	0.3	0.9	bdl	bdl	bdl
555PX84	26.9	149.5	3713	488	260	1802	29.1	18.9	14.3	bdl	1.5	5.73	1.28	8.43	3.15	0.88	3.6	0.56	3.94	0.76	2.3	0.32	1.94	0.28	0.71	bdl	0.11	bdl
555PX85	24.9	164.9	3596	426	124	2021	25.7	21.2	16.8	bdl	2.09	8.27	1.71	10.92	3.38	0.87	4.41	0.69	4.4	0.89	2.56	0.36	2.51	0.33	0.7	0.07	0.29	0.05
555PX91	28.9	181.6	3415	371	37	2371	25.3	25.6	17.1	bdl	1.63	6.34	1.51	9.86	4.12	0.97	4.55	0.84	5.17	1.06	2.88	0.43	2.67	0.37	0.93	0.08	bdl	bdl
555PX92	21.1	139.8	3200	362	75	1791	27	15.2	11.2	bdl	1.2	4.65	1.07	6.85	2.73	0.65	2.91	0.5	3.38	0.63	1.89	0.26	1.39	0.16	0.49	bdl	0.18	bdl
555PX93	25.6	159.5	3447	408	103	2155	24.1	21	15.1	bdl	1.87	7.11	1.55	9.31	3.32	0.8	3.67	0.64	4.72	0.91	2.4	0.34	2.18	0.31	0.84	0.1	0.16	bdl
555PX96	13	106.7	1634	214	751	1172	23.3	7.5	5.5	bdl	0.72	2.7	0.63	3.56	1.24	0.4	2.01	0.24	1.76	0.32	0.91	0.09	0.81	0.1	0.29	bdl	bdl	bdl
555PX98	21.3	150.2	3038	358	211	1895	26	18.2	13.6	bdl	1.52	5.91	1.29	8.63	3	0.78	3.59	0.59	3.73	0.8	2.27	0.26	1.68	0.28	0.5	0.07	0.08	0.03
555PX99	23.7	158.3	3094	378	91	2264	24.6	28.5	18.8	bdl	2.52	9.56	1.99	12.69	4.6	0.95	5.51	0.87	5.6	1.15	3.58	0.5	2.8	0.42	0.88	0.07	0.3	0.05
555PX910	22.4	161.4	3136	364	93	1685	26.5	16.9	13.4	bdl	1.17	4.65	1.08	7.92	2.62	0.82	3.51	0.59	3.42	0.71	1.84	0.23	1.47	0.27	0.71	bdl	bdl	bdl
555PX912	26.6	163.4	2465	355	80	2122	26.1	25.6	17.5	1.02	2.2	7.84	1.64	10.83	3.75	0.84	4.24	0.77	5.18	1.02	3.18	0.45	2.89	0.42	0.71	0.09	0.28	0.06
555PX916	31.9	161.4	4111	539	124	1904	27.6	20.6	18.5	bdl	1.63	6.52	1.45	9.59	3.67	1.08	4.66	0.69	4.33	0.82	2.47	0.31	2.13	0.3	0.97	bdl	bdl	bdl
555PX917	30.6	169.3	4439	731	181	2673	24.5	23.2	16.5	bdl	1.44	6.46	1.47	9.26	3.77	0.93	4.92	0.76	5.15	1	2.86	0.37	2.44	0.37	0.82	0.09	bdl	bdl
555PX918	17.2	123.1	2802	389	494	1626	22.6	10.7	8.5	bdl	0.65	2.77	0.6	4.3	1.82	0.48	2.09	0.38	2.61	0.46	1.32	0.16	1.43	0.2	0.57	bdl	bdl	bdl
555PX101	50.8	173.4	4085	505	109	1838	27.8	17.3	15.2	bdl	1.27	5.61	1.22	8.17	3.13	0.83	3.69	0.69	3.84	0.74	2.09	0.29	1.88	0.26	0.86	bdl	bdl	bdl
555PX102	43.9	137.9	2900	403	224	1868	25.8	13.1	10.8	bdl	0.89	3.91	0.88	5.69	2.19	0.66	2.45	0.45	3.1	0.54	1.73	0.26	1.44	0.2	0.68	bdl	bdl	bdl
555PX103	47.3	121.2	2722	357	538	1635	25.5	11.1	9.4	1.13	0.94	3.75	0.84	5.4	1.85	0.55	2.28	0.38	2.21	0.51	1.34	0.18	1.14	0.1	0.45	0.1	bdl	bdl
555PX104	41.8	118.3	3102	361	106	1786	27.5	18.1	15.2	bdl	1.46	5.94	1.43	8.88	3.59	0.86	4.3	0.58	3.69	0.81	2.05	0.23	1.92	0.25	0.91	0.08	bdl	bdl
555PX105	24.5	130.7	2736	352	438	1844	24.3	12.8	10.9	bdl	1.12	4.41	0.96	5.99	2.55	0.59	3	0.45	2.81	0.5	1.48	0.24	1.39	0.2	0.55	bdl	bdl	bdl
555PX106	41.7	141.5	4161	458	75	2581	25.6	27.9	21.3	bdl	2.1	9.18	2.06	12.51	4.81	1.04	5.87	0.91	5.65	1.19	3.6	0.5	3.05	0.37	1.13	bdl	0.18	0.05
555PX108	31.7	136.7	3303	396	141	1623	27.2	12.2	10.2	bdl	0.88	3.98	0.93	5.62	2.27	0.64	2.96	0.44	2.55	0.57	1.73	0.22	1.26	0.17	0.59	0.08	0.07	0.03
555PX109	40.9	144.7	3992	451	278	1859	26	16.2	14.1	bdl	1.21	5.03	1.09	7.16	2.81	0.72	3.01	0.53	3.58	0.65	2.2	0.26	1.68	0.23	0.68	bdl	0.11	bdl
555PX1010	46.1	156.7	3921	470	231	1995	28	17.7	14.9	1.29	1.24	5.44	1.24	7.32	3.06	0.79	4.03	0.57	3.74	0.69	1.87	0.31	1.69	0.18	0.71	0.06	0.09	bdl
555PX1012	20.4	136.1	3463	460	615	1522	26.8	12	11.8	bdl	0.96	4.22	0.88	5.57	2.06	0.64	3.37	0.41	2.71	0.53	1.35	0.22	1.05	0.1	0.66	bdl	bdl	bdl
555PX1013	26.1	133.2	3474	465	172	1905	27.9	13.3	11	bdl	0.93	4.54	1	6.17	2.49	0.72	2.44	0.44	2.47	0.62	1.63	0.23	0.95	0.15	0.56	bdl	bdl	bdl
555PX1015	37.7	125.6	3531	407	195	1976	26.4	17	13.3	bdl	1.06	5.07	1.16	7.01	2.56	0.79	3.13	0.5	3.46	0.67	2.04	0.25	1.55	0.21	0.72	bdl	bdl	bdl
555PX1017	39.3	141.3	2841	428	291	1832	25.3	12.8	8.3	bdl	0.71	3.49	0.72	5.04	1.94	0.62	2.83	0.43	2.62	0.53	1.73	0.21	1.17	0.14	0.6	bdl	bdl	bdl
555PX1020	36.7	134.9	3152	408	103	1850	29.1	15.2	12.1	bdl	1.15	5.36	1.13	6.78	2.6	0.72	2.96	0.57	3.1	0.62	1.6	0.28	1.49	0.18	0.61	0.12	0.1	bdl
164BPX21	45.2	108.7	3337	345	480	1765	29.7	19.4	18.8	bdl	2	8.54	1.97	10.54	3.64	0.97	3.97	0.75	4.12	0.79	2.3	0.3	1.7	0.25	0.86	0.11	bdl	bdl
164BPX22	28.9	68.7	857	110	2295	878	28	4.2	2	bdl	0.4	1.54	0.33	2.02	0.84	0.25	1.06	0.18	0.86	0.21	0.49	bdl	0.55	bdl	bdl	bdl	bdl	bdl
164BPX23	40.4	97.8	2396	262	1716	1501	28.2	14.3	12.7	bdl	1.44	6.13	1.42	7.81	2.75	0.76	2.93	0.54	3.3	0.58	1.73	0.21	1.41	0.19	0.58	bdl	bdl	bdl
164BPX31	398.2	114.5	3746	348	480	1948	27.9	27.1	26	bdl	3.09	13.08	2.74	15.64	6.16	1.19	6.13	1.02	5.83	1.18	3.18	0.43	2.86	0.38	1.29	0.17	0.11	0.04
164BPX32	28.2	66.7	998	118	1534	1444	26.8	6.8	4.1	bdl	1.42	4.7	0.89	4.5	1.43	0.46	1.74	0.24	1.48	0.24	0.98	0.12	0.77	0.11	0.15	bdl	bdl	bdl
164BPX33	31	126.5	2665	299	194	2234	25.5	40.4	30.6	bdl	4.01	17.75	3.97	23.82	8.45	1.27	9.41	1.47	8.57	1.68	4.71	0.64	4.3	0.51	1.54	bdl	bdl	bdl
164BPX34	35.3	105	3496	408	406	1960	29.1	19.5	19.7	bdl	2.01	8.72	1.91	11.15	3.87	0.87	4.93	0.7	4.68	0.82	2.39	0.31	1.87	0.23	0.9	0.11	bdl	bdl
164BPX35	37.6	146	3107	326	65	2597	23.3	42.7	33.5	bdl	4.02	17.52	3.98	24.86	8.58	1.23	8.88	1.4	9.47	1.62	5.26	0.69	4.26	0.56	1.74	bdl	bdl	bdl
164BPX36	41.8	104.9	3295	388	417	1987	28.1	19.9	19.3	bdl	2.09	8.95	1.91	12.53	3.43	0.97	4.56	0.63	4.3	0.8	2.39	0.38	1.93	0.25	0.91	bdl	bdl	bdl
164BPX37	30.7	122	2698	297	232	2160	26.1	32.2	25.5	0.99	3.13	13.88	2.98	17.72	5.74	1.08	7.4	1.05	6.52	1.32	3.69	0.53	3.1	0.53	1.15	0.08	bdl	bdl
164BPX38	35.3	134.8	3864	400	132	2454	26.7	37	36.2	bdl	3.36	14.59	3.21	20.22	7.22	1.29	7.81	1.17	8.2	1.52	4.55	0.56	3.25	0.48	1.73	0.14	0.05	bdl
164BPX39	30.7	107.8	3143	383	311	1957	27.8	20.7	18.8	bdl	2.02	8.26	1.82	11.29	3.64	0.94	4.41	0.69	4.38	0.83	2.53	0.28	1.87	0.29	0.84	bdl	bdl	bdl
164BPX41	50.4	132.3	4708	329	47	2828	25.8	34.2	32	bdl	3.25	12.94	2.75	16.73	6	1.4	7.12	1.12	7.36	1.41	4.04	0.49	3.13	0.5	1.62	bdl	bdl	0.03
164BPX42	37.5	103.8	3379	366	634	1844	31	18.1	17.7	bdl	2	8.37	1.86	10.29	3.6	0.92	3.77	0.63	3.87	0.76	1.95	0.27	1.85	0.22	0.79	0.1	bdl	0.03
164BPX43	47.6	123	4332	448	216	2473	28.5	29.3	27.4	bdl	2.97	12.46	2.67	16.27	5.89	1.22	5.94	0.94	6.11	1.18	3.33	0.46	2.92	0.37	1.33	0.12	0.06	bdl
164BPX44	40.2	109.7	3877	407	511	1995	30.3	21.2	21.6	bdl	2.34	9.55	2.06	11.75	4.09	1.13	4.38	0.62	4.28	0.85	2.53	0.29	1.69	0.29	0.84	0.11	bdl	bdl
164BPX52	29.5	144.2	3769	375	142	2499	25.5	42.9	35.1	bdl	4.19	18.06	3.93	23.61	8.08	1.33	9.1	1.44	9.78	1.77	5.02	0.69	3.82	0.66	1.56	0.15	bdl	bdl
164BPX53	27.3	97.1	2895	294	1017	1467	33.6	13.3	15.2	4.34	1.67	6.54	1.33	8.07	2.7	0.72	3.32	0.42	2.99	0.51	1.65	0.19	1.08	0.21	0.83	0.17	0.09	0.06
164BPX54	29.4	113.9	4325	487	413	2139	31.3	23.2	22.9	bdl	2.32	9.74	2.15	12.08	4.5	1.05	5.08	0.74	5.13	0.95	2.66	0.4	2.09	0.27	1.11	0.13	bdl	bdl
164BPX55	31.1	143.4	3911	344	55	2630	28.7	26.2	18.4	bdl	2.41	9.08	2	12.28	4.37	0.98	5.2	0.82	5.7	1.04	3.1	0.44	2.55	0.39	0.84	0.09	bdl	0.03
164BPX56	31.1	111.5	4026	432	521	1937	30.8	21.1	21.2	bdl	2.12	9.16	2.05	12.19	4.07	1.02	4.63	0.78	4.21	0.85	2.36	0.36	1.9	0.27	0.91	bdl	bdl	bdl
164BPX57	32.2	143.5	4034	378	71	2624	28.3	27.2	19.9	bdl	2.38	9.98	2.19	11.99	4.48	1.06	5.38	0.83	5.52	1.1	3.02	0.39	2.89	0.39	0.83	0.17	bdl	bdl
164BPX58	26.5	107.6	3559	392	444	1894	30.3	20	18.7	bdl	1.96	8.39	1.76	10.88	4.01	0.9	4.91	0.7	3.88	0.78	2.15	0.29	1.86	0.31	0.9	0.12	0.05	bdl
164BPX61	43.5	125.2	4520	496	496	2327	30.8	27.9	25.8	0.74	2.94	11.34	2.35	14.7	5	1.17	5.92	0.94	5.5	1.05	3.13	0.38	2.61	0.41	1.24	0.15	bdl	bdl
164BPX62	39.9	102.5	2164	294	1840	1505	33.7	12.9	10.3	bdl	1.6	6.87	1.43	8	3	0.87	2.41	0.46	2.73	0.51	1.31	0.17	1.15	0.14	0.46	bdl	bdl	bdl
164BPX63	28.8	108.3	3723	406	435	1949	31.2	20.4	19.4	bdl	2.11	9	1.91	11.45	3.84	1.03	4.07	0.58	4.49	0.84	2.02	0.31	1.65	0.28	0.81	0.12	bdl	bdl
164BPX64	46.7	126.1	5095	535	407	2559	28.9	32.7	31.8	bdl	3.23	12.94	2.79	15.95	5.8	1.27	7.83	1.04	6.44	1.34	3.57	0.5	2.97	0.37	1.45	0.13	bdl	bdl
164BPX65	33.3	103.9	2006	248	2755	1438	30.9	9.8	9.9	bdl	1.15	4.52	0.98	5.63	2.11	0.6	2.44	0.37	2.13	0.37	0.95	0.14	1.02	0.05	0.68	bdl	bdl	bdl
164BPX66	33.4	106.6	3693	341	553	1778	30.1	20.7	20.3	bdl	2.15	8.56	1.89	11.02	3.93	1.07	4.93	0.67	4.33	0.86	2.24	0.31	2.47	0.27	0.96	bdl	bdl	bdl
164BPX71	47.2	138.6	4631	455	137	2831	26.8	38.6	34.3	bdl	3.4	14.36	3.03	17.46	6.94	1.29	7.7	1.21	7.75	1.58	4.12	0.61	4.05	0.55	1.69	bdl	bdl	0.03
164BPX72	38.3	110.4	3636	352	523	1827	31	20.9	22.8	bdl	2.22	9.13	1.95	12.07	4.43	1.07	4.49	0.68	4.56	0.88	2.37	0.32	1.9	0.28	1.03	bdl	bdl	bdl
164BPX73	46.7	114.4	4017	406	254	2114	29	25.7	24.8	bdl	2.7	11.24	2.52	14.38	4.94	1.15	5.95	0.88	5.12	1.01	3.17	0.33	2.57	0.29	0.93	0.08	bdl	bdl
164BPX81	42	140.3	4157	395	77	2641	24.2	46.3	46.1	bdl	4.48	17.99	4.02	23.91	8.44	1.48	10.38	1.55	9.92	1.94	5.5	0.69	4.73	0.65	1.84	0.1	bdl	bdl
164BPX82	18	66.9	1301	147	2200	1318	30	7	4.6	bdl	0.95	3.36	0.66	4.48	1.46	0.39	1.58	0.25	1.56	0.3	0.73	0.11	0.62	0.07	0.19	bdl	bdl	bdl
164BPX83	34	111.7	3562	369	430	1799	29.4	21.1	20.8	bdl	2.13	8.57	2.01	11.25	4.33	1.1	4.95	0.72	4.6	0.85	2.26	0.35	2.11	0.27	1	0.07	bdl	bdl
164BPX91	27.3	130.5	3199	339	276	2173	25.8	32.3	25.8	bdl	3.3	12.81	2.9	17.88	6.53	1.14	8.15	1	6.87	1.34	3.73	0.47	3.44	0.5	1.19	0.11	bdl	bdl
164BPX92	34.5	134.2	3191	337	110	2226	27	34.4	28.1	bdl	3.45	14.12	3.09	18.58	6.44	1.12	7.69	1.25	7.18	1.49	3.96	0.53	3.24	0.53	1.28	bdl	bdl	bdl
164BPX93	35.4	110.8	3276	370	391	1924	29.3	20.4	18.5	bdl	1.94	8.09	1.78	11.04	3.91	0.94	4.08	0.75	4.4	0.86	2.3	0.33	2.08	0.26	0.93	bdl	bdl	bdl
164BPX101	34.8	131.5	3633	341	102	2124	26.9	35.5	32.3	bdl	3.67	14.08	3.18	18.7	6.57	1.24	7.64	1.16	7.4	1.33	3.98	0.58	3.88	0.49	1.22	bdl	0.07	bdl
164BPX102	32.8	102.3	1771	207	2270	1126	30.7	11.8	9.5	bdl	1.27	4.77	1.07	6.27	2.32	0.69	2.91	0.39	2.61	0.51	1.41	0.18	1.11	0.13	0.41	bdl	bdl	bdl
164BPX103	42.7	115	3673	383	436	1669	32.3	21.9	22.1	bdl	2.23	8.87	2.05	12.57	4.38	1.14	4.92	0.73	4.63	0.87	2.33	0.3	1.89	0.23	1.08	0.11	bdl	bdl
557PX11	41.3	123.3	2954	281	303	1921	28.1	28.3	23.4	bdl	3.21	12.31	2.68	15.07	5.43	1.08	6.02	0.91	5.88	1.2	3.29	0.51	3.07	0.35	1.09	0.15	bdl	bdl
557PX12	48.8	138.1	4234	479	185	2303	26.8	29.4	24.7	bdl	2.96	12.43	2.65	16.93	6.1	1.16	6.08	0.94	5.81	1.21	3.77	0.5	2.9	0.47	1.18	bdl	bdl	bdl
557PX13	44.1	136.3	4283	509	278	2807	26.9	38.7	29.8	bdl	4.62	17.85	3.8	22.33	7.53	1.25	8.18	1.18	7.89	1.62	4.39	0.68	3.73	0.66	1.1	0.11	0.08	bdl
557PX14	40.6	118.3	3140	411	573	2133	27.9	29	26.7	bdl	3.25	13.97	3.02	16.99	6.04	1	6.42	0.86	6.26	1.26	3.43	0.52	2.84	0.46	1.07	0.15	0.07	bdl
557PX15	35.4	147.5	2929	320	107	2593	25.2	43.3	38.1	bdl	5.15	23.13	4.89	28.8	8.91	1.25	10.2	1.45	9.36	1.87	5.09	0.73	4.23	0.6	1.63	0.08	bdl	0.04
557PX21	36.8	130.4	3740	516	270	2501	28.9	23.7	20.1	bdl	2.31	10.31	2.2	13.26	4.62	0.98	5.12	0.76	5.07	0.98	2.66	0.35	2.14	0.35	0.77	0.1	bdl	bdl
557PX22	29.2	115.9	3087	458	404	2065	31.1	19	16.5	bdl	2.15	8.96	1.88	11.21	3.8	0.84	4.42	0.69	4.14	0.8	2.46	0.29	1.68	0.28	0.72	0.12	0.05	bdl
557px23	37.4	123.9	3816	597	425	2433	29.5	25.6	21.6	bdl	2.44	11.13	2.37	13.97	5.29	1.1	5.49	0.81	5.22	0.98	2.92	0.37	2.48	0.37	0.87	0.06	bdl	bdl
557PX32	38.8	145	3689	431	514	2144	31.5	24.2	20.8	bdl	2.42	9.15	2.01	13.59	4.69	0.97	5.69	0.81	5.22	0.97	2.84	0.42	2.51	0.32	0.73	0.09	0.21	0.02
557PX33	44.6	116.4	3183	474	650	1984	29.9	21.8	19.6	bdl	2.54	9.92	2.13	13.92	4.62	0.98	5.42	0.82	4.72	0.94	2.7	0.34	1.97	0.29	0.88	0.11	bdl	bdl
557PX41	32	68.7	1449	115	3060	1094	35.9	7.2	9.6	bdl	1.52	5.06	0.93	5.35	1.57	0.42	1.67	0.2	1.53	0.25	0.84	0.11	0.63	0.09	0.3	0.07	bdl	bdl
557PX42	50.1	112.8	3246	449	569	2096	29.5	22.8	19.5	bdl	2.55	10.53	2.26	12.94	4.16	0.86	4.59	0.73	4.76	0.84	2.37	0.32	2.34	0.3	0.83	bdl	bdl	bdl
557PX51	239.6	156.3	4474	494	120	2575	28.4	32.1	26.5	bdl	4.25	13.7	2.91	17.86	6.68	1.3	6.73	1	6.81	1.3	3.83	0.48	3.35	0.44	1.4	0.09	0.05	bdl
557PX52	42.7	124.9	4397	569	438	2325	30.1	29.4	26.8	bdl	3.29	14.51	3.08	17.26	6.41	1.12	6.88	0.98	5.89	1.14	3.45	0.49	2.55	0.45	1.01	bdl	bdl	bdl
557PX61	45.5	126.9	3464	458	462	2371	28.7	21.5	16.9	bdl	2.04	8.73	1.88	11.61	4.2	0.95	4.95	0.71	4.56	0.88	2.38	0.32	2.22	0.31	0.69	bdl	bdl	bdl
557PX62	48.8	119.4	3701	570	341	2361	30.2	23	18.7	0.71	2.36	9.75	2.09	11.74	4.54	1.01	5.02	0.73	4.56	0.93	2.55	0.34	2.02	0.36	0.97	0.08	bdl	bdl
557PX63	53.5	146.9	4151	486	93	2492	30.1	32	28.6	bdl	3.68	14.64	3.01	19.06	6.59	1.26	7.19	1.06	7.02	1.33	3.61	0.44	3.35	0.55	1.18	0.07	bdl	bdl
557PX71	34	141.1	4005	417	446	2051	27.4	33.1	34	bdl	4.33	15.44	3.47	19.76	6.62	1.25	6.77	1.12	6.89	1.29	3.91	0.52	3.42	0.46	1.61	0.12	0.05	bdl
557PX72	45.9	155.1	4641	525	178	2223	29.6	29	23.7	bdl	2.59	9.74	2.22	14.68	5.17	1.25	5.71	0.88	6.23	1.19	3.42	0.48	2.66	0.39	1.14	0.05	0.05	bdl
557PX73	36.6	127.9	3519	430	331	1888	29.7	26.5	23.2	bdl	2.95	10	2.37	14.99	5.17	1.01	5.75	0.89	5.47	1.03	3.05	0.37	2.44	0.34	1.12	bdl	bdl	bdl
557PX74	52.7	136.8	3912	493	468	2309	30.3	25	21	bdl	2.53	9.83	2.22	13.72	5.08	1.05	5.7	0.87	5.53	0.99	3.05	0.39	2.37	0.39	0.96	0.06	bdl	bdl
557PX75	43	149.7	3988	390	69	2320	29.7	34.8	28.6	bdl	3.92	14.02	3.2	19.67	7.13	1.26	7.52	1.17	7.32	1.38	4.19	0.58	3.5	0.47	1.12	0.14	0.04	bdl
557PX76	35	108.1	3014	324	546	1704	33	18.2	16.8	bdl	2.04	8.22	1.85	10.36	4.11	0.93	4.15	0.65	4.13	0.81	1.87	0.27	1.54	0.24	0.9	bdl	bdl	0.02
557PX77	38.2	114.7	3289	311	553	1646	33.3	19.4	19.6	bdl	2.14	8.37	1.93	11.71	4.38	0.98	4.65	0.65	4.01	0.78	2.15	0.26	1.78	0.24	0.98	0.08	bdl	bdl
557PX81	20.7	133.1	2743	447	243	2620	36.4	30.8	24.8	bdl	2.79	12.33	2.67	17	5.34	1.23	6.06	1.03	6.27	1.18	3.54	0.46	2.9	0.45	1.18	0.06	bdl	bdl
557PX82	16	66.6	1110	92	2697	889	38.6	5.5	4.2	bdl	0.86	3.43	0.72	4.27	1.4	0.42	1.77	0.26	1.19	0.23	0.73	0.09	0.48	0.09	0.16	bdl	bdl	bdl
557PX83	277.7	120.1	3516	410	232	2106	30.1	26.4	22	bdl	3.92	14.65	2.97	17.32	5.36	1.09	5.91	0.97	5.84	1.04	3.03	0.4	2.5	0.32	1.07	0.1	bdl	bdl
557PX91	30.2	83.6	2178	231	2909	2334	27.3	28.2	20.9	bdl	4.53	17.04	3.44	18.22	5.51	1	5.71	0.83	5.33	1.11	3.43	0.47	2.61	0.42	0.49	0.13	0.04	bdl
557PX92	36.5	118.1	3860	511	515	2051	30.4	23.7	21.2	bdl	2.61	10.69	2.26	14.07	4.59	1.02	5.09	0.7	4.93	0.93	2.68	0.36	2.32	0.33	1.13	0.06	bdl	bdl
557PX93	25.8	110.1	3395	391	1272	2504	26.7	33.6	26.4	bdl	4.69	18.62	3.61	20.47	6.03	1.15	6.8	1.02	6.27	1.32	3.75	0.5	3.26	0.49	0.95	0.13	0.05	bdl
557PX94	27.5	113.7	3640	496	592	2125	29.7	22.7	19.9	bdl	2.37	10.65	2.2	14.05	4.33	0.99	4.49	0.81	4.43	0.89	2.78	0.35	2.14	0.31	1.15	0.06	bdl	bdl
557PX95	37.8	113.5	3733	417	528	2302	29.8	23.4	20.4	bdl	2.92	11.86	2.32	14.06	4.85	1.02	4.81	0.83	4.77	0.9	2.55	0.34	2.22	0.29	0.85	0.1	0.05	0.03
557PX96	31.2	118.8	3718	421	476	2070	28.7	23.7	21.7	bdl	2.68	11.37	2.28	13.95	4.87	1.05	5.19	0.77	5.07	0.92	2.67	0.35	2.35	0.32	1	0.08	0.05	bdl
704CPX11	50	145.1	2737	274	59	2393	27.6	37	35.1	bdl	5.22	22.19	4.49	24.96	8.11	1.42	9.05	1.21	7.71	1.49	4.37	0.59	3.56	0.49	1.65	0.22	0.07	0.02
704CPX12	50.4	154.5	2971	281	48	2437	33.2	42.6	38.8	bdl	6.06	25.78	5.27	29.87	9.42	1.67	9.89	1.55	9.08	1.71	4.79	0.66	4.16	0.58	1.7	0.29	1.21	0.09
704CPX36	51	56	1514	116	38	4423	0.1	6.4	3.4	bdl	0.03	0.19	0.05	0.37	0.31	0.06	0.38	0.12	1.08	0.24	0.93	0.16	1.1	0.24	0.15	bdl	bdl	bdl
704CPX51	50.1	141.2	3195	310	102	2578	29.7	35.8	32	bdl	4.64	21.03	4.17	23.28	7.62	1.34	8.24	1.25	7.46	1.38	4.09	0.57	3.47	0.54	1.23	0.17	0.05	bdl
704CPX52	56.7	128.9	2483	287	1552	1792	33.3	22.6	19.8	bdl	3.19	13.53	2.64	15.34	4.98	1.16	5.53	0.8	5.02	0.98	2.54	0.33	2.07	0.34	0.95	0.1	0.04	bdl
704CPX53	60.5	143.7	3682	407	96	2404	29.1	33.2	34.2	bdl	4.43	19.89	3.92	22.5	7.18	1.4	7.78	1.21	7.24	1.32	3.66	0.51	3.33	0.46	1.61	0.2	0.08	0.02
704PX63	51.7	155.7	3670	358	96	2501	29.9	37.1	35.2	bdl	4.65	19.83	4.02	23.39	7.79	1.44	8.72	1.27	7.83	1.49	4.18	0.6	3.36	0.53	1.55	0.17	bdl	bdl
704PX64	48.7	152.3	3191	294	46	2526	28.6	33.7	30.1	bdl	4.11	18.6	3.74	21.68	7.11	1.28	7.66	1.12	7.25	1.34	3.75	0.55	3.54	0.48	1.33	0.14	bdl	bdl
704PX65	48.4	134.6	3191	313	65	2339	29.1	31	29.4	0.76	4.3	19.19	3.91	21.74	7.18	1.32	7.22	1.14	6.87	1.24	3.44	0.52	3.06	0.46	1.36	0.18	0.04	0.05
704CPX72	50.1	140.7	3084	316	59	2411	26.3	32.1	27.9	bdl	4.13	18.3	3.67	21.03	6.93	1.21	7.07	1.11	6.74	1.28	3.48	0.52	3.16	0.41	1.32	0.2	0.03	bdl
704CPX73	41.3	152.4	2492	277	30	2553	26.4	45.8	37.5	bdl	6.9	30.07	5.93	32.94	10.37	1.47	10.48	1.55	9.7	1.87	5.21	0.74	4.38	0.66	1.73	0.49	0.06	bdl
704CPX74	31	158.1	2468	282	49	2597	26.1	50.9	44.8	bdl	7.25	31.67	6.22	35.4	11.33	1.48	12.22	1.73	11.21	2.11	6.08	0.77	4.99	0.71	1.68	0.34	0.11	0.09
590PX11	33.3	123.9	910	420	1188	1581	9.5	22.5	13.3	2.97	1.66	6.19	1.22	7.34	2.99	0.25	3.67	0.66	4.78	0.93	2.51	0.38	2.41	0.38	0.66	0.52	0.24	0.03
590PX12	28.8	132.6	1443	400	1168	1571	11	34.2	16.7	3.58	2.47	9.95	2.01	11.73	4.11	0.59	5.78	1.05	6.69	1.4	3.89	0.61	3.74	0.51	0.86	0.1	0.17	0.03
590AM13	36.8	98.8	6504	430	1513	1167	15.5	26.5	34.5	50.36	7.91	23.62	3.32	14.67	3.83	0.81	4.45	0.7	4.56	1.05	3.12	0.43	2.98	0.42	2.17	0.25	0.2	0.05
590PX21	38	72.9	1033	271	4975	1264	15.4	12.4	6.3	bdl	1.03	3.9	0.73	4.37	1.53	0.26	1.95	0.34	2.33	0.48	1.48	0.26	1.46	0.19	0.18	0.06	bdl	bdl
590AM23	54.9	150.1	12305	952	1117	891	34.3	118.7	90.2	114.58	11.73	45.57	9.38	55.66	18.4	1.76	21.98	3.61	23.33	4.64	13.41	1.72	10.51	1.36	4.34	0.28	0.14	0.04
590PX31	183.2	142.5	2783	595	640	2111	14.3	28	16.7	0.57	2.46	8.86	1.85	10.3	3.69	0.72	4.98	0.86	5.35	1.17	3.45	0.48	3.34	0.42	0.71	0.88	0.1	0.06
590PX32	27.6	129.3	1424	474	1079	1547	12.2	29.4	17	2.95	2.14	8.92	1.71	10.47	4.05	0.47	5.2	0.84	5.46	1.19	3.88	0.5	2.87	0.42	0.72	0.19	0.18	0.03
590AM33	43	118.2	5391	560	1535	1269	24	24.3	51.5	33.68	6.64	18.14	2.38	10.63	2.82	0.68	3.81	0.69	4.67	1.03	3.12	0.42	3.13	0.49	2	0.47	0.22	0.1
590PX41	25.7	163.5	1038	475	902	1747	10.4	27	15.2	1.98	1.84	7.18	1.56	8.8	3.24	0.45	4.91	0.78	5.47	1.17	3.43	0.43	2.75	0.41	0.76	0.14	0.18	0.06
590PX42	30.1	118	1239	311	1802	1852	13.7	16	9.6	2.92	1.84	6.29	1.17	6.7	2.25	0.44	2.73	0.46	3.15	0.67	1.88	0.27	1.66	0.23	0.4	0.2	0.12	0.04
590PX43	28.4	162.9	2118	634	1288	1620	13.2	44.8	23.9	4.46	2.66	11.19	2.44	14.5	5.65	0.68	7.68	1.29	9.06	1.91	5.5	0.67	4.42	0.57	1.16	0.13	0.08	bdl
590PX51	25	143.2	1534	469	1145	1600	11.4	30.6	17.6	0.77	2.34	9.41	1.88	10.75	4.08	0.51	5.28	0.83	5.97	1.17	3.53	0.53	2.85	0.51	0.79	0.17	0.27	0.04
590PX52	30.6	173.5	1773	640	1679	1453	11.9	46.9	26.6	1.36	2.49	10.91	2.39	13.99	5.91	0.66	8.24	1.3	8.4	1.95	5.39	0.76	4.86	0.64	1.43	bdl	0.06	bdl
590AM53	46.9	116.7	9978	662	967	943	24.9	67.1	58.8	88.3	9.5	35.52	6.65	34.74	10.5	1.38	10.37	1.85	11.91	2.52	7.22	1.04	6.71	0.89	2.75	0.33	0.07	bdl
590PX61	31.9	81.4	756	194	1259	1219	22.9	9.3	7.9	2.08	1.23	4.08	0.71	3.77	1.29	0.26	1.42	0.22	1.8	0.33	1.12	0.15	0.96	0.17	0.23	0.15	0.12	0.04
590AM62	40.2	99.3	6766	482	1189	1035	17.5	47.4	43.9	48.51	7.76	28.52	4.81	24.16	7.1	1.09	7.45	1.26	8.16	1.77	5.23	0.76	5.02	0.72	2.19	0.25	0.19	0.05
590AM71	15.5	69.1	471	194	169	815	5.5	11.5	7.8	0.78	0.87	3.52	0.69	4.07	1.42	0.22	1.81	0.33	2.29	0.52	1.39	0.21	1.24	0.18	0.29	0.1	0.06	bdl
590PX72	27.2	127.6	1141	414	1160	1497	10.3	28.5	12.4	4.06	2.28	8.93	1.77	9.65	3.52	0.51	4.82	0.82	5.53	1.18	3.5	0.5	2.98	0.46	0.65	0.19	0.15	bdl
590AM73	43.9	115.8	10961	809	1589	1063	25	80.3	65.6	74.7	9.86	39.12	7.1	37.55	11.94	1.42	12.98	2.05	14.04	3.08	9.07	1.19	7.94	1.06	3.16	0.39	0.18	0.07
590PX91 AM?	127.3	134.5	2626	534	693	1870	13.7	24.8	16.2	11.75	2.27	7.93	1.54	8.63	3.42	0.65	4.43	0.73	4.85	1.03	3.14	0.41	2.47	0.35	0.83	0.29	0.13	0.05
590PX92	24.1	123.6	1218	509	1304	1595	11.4	22.9	15	0.95	1.58	6.19	1.25	7.34	3.03	0.43	3.65	0.66	4.42	0.89	2.75	0.4	2.57	0.34	0.57	0.18	0.12	0.03
590AM93	32.1	74.9	2315	235	352	1383	8.6	19	26	12.3	4.19	10.2	1.5	6.93	2.25	0.46	3.06	0.47	3.69	0.8	2.3	0.33	2.49	0.33	0.9	0.19	0.21	0.05
MME
686AM11	63.1876	84.6064	7786.66	372.65	355.466	3288.63	45.3695	56.3597	50.2159	148.744	21.0894	69.2871	10.9055	52.9943	12.8275	2.76526	11.2177	1.58498	10.0453	2.00393	6.00603	0.929839	6.43306	0.904548	2.75761	1.09635	0.345789	0.120444
686AM12	63.3405	90.8811	9227.06	435.512	286.424	3280.4	46.4114	59.0114	66.5849	146.369	22.075	71.5552	11.5305	56.1345	13.5837	2.779	12.6709	1.83058	11.2934	2.33234	6.50024	0.895003	6.36619	0.787205	3.67229	1.327	0.268133	0.103283
686AM21	49.7652	81.0269	8889.33	395.713	364.959	3615.55	45.1742	54.118	53.6071	104.783	20.9271	69.8455	11.2694	51.6713	12.4055	2.87237	11.1212	1.57325	9.91787	2.0503	5.97911	0.931589	6.27395	0.841965	2.58492	1.3677	0.267926	0.107763
686AM22	39.5276	79.6559	12672.9	448.448	176.189	2412	70.2854	49.7215	71.6224	182.278	16.425	55.5072	9.1642	44.7727	12.1614	2.00011	11.7299	1.58575	10.1889	1.9099	5.55398	0.76348	4.86443	0.665737	3.16393	0.886138	0.275466	0.0745609
686AM31	38.5129	83.7614	12739	464.225	165.451	2415.89	73.0631	59.4834	74.7786	184.651	17.4673	63.5825	10.9503	54.9276	14.1733	2.22378	13.3399	1.94539	11.9956	2.20141	6.41654	0.844471	5.56103	0.710627	3.44156	1.03832	0.22087	0.0867506
686AM32	41.7301	93.292	10929	432.307	108.366	2444	59.9537	51.8039	62.8144	122.98	14.8332	51.6195	8.4903	43.5446	11.9552	1.84149	11.8852	1.69615	9.66012	1.98046	5.55823	0.756285	4.7414	0.629124	2.86541	0.892619	0.170206	0.0971275
686AM41	44.8584	68.744	10561.7	376.657	212.584	2323.29	64.7722	34.6509	63.0447	108.662	15.1811	45.2548	6.90389	31.5665	7.51445	1.86497	7.55925	1.03891	6.61358	1.31027	4.06338	0.530307	3.91858	0.562098	2.51603	0.851972	0.323178	0.10927
686AM42	49.1734	94.9379	13055.4	450.424	86.5877	2341.73	70.1896	63.4595	80.0498	164.375	18.4626	63.521	11.1761	56.8375	14.7273	2.41555	14.4113	1.99774	12.2001	2.42983	6.62863	0.904304	6.24093	0.846619	3.54751	1.90232	0.281571	0.0923836
686AM43	44.6768	131.344	14020.6	532.527	57.025	2260.02	74.0772	91.1763	95.2708	184.433	20.8231	75.4457	13.9869	74.1552	21.07	2.99092	20.7415	2.98091	17.774	3.53825	10.3228	1.34466	8.38471	1.14766	4.34353	1.09973	0.218861	0.0629937
686AM44	41.8	71.1	9705	486	166	3242	54.9	37.8	48.5	109.67	15.72	56.22	8.44	38.01	8.81	1.85	8.08	1.16	7.19	1.47	4.16	0.62	4.05	0.56	2.2	2.1	0.15	0.06
686AM61	36	60.1	7755	400	174	3137	36.5	37.2	33.1	55.85	16.87	59.42	8.54	37.71	8.62	2.11	8.14	1.17	7.41	1.4	4.28	0.6	4.06	0.6	1.79	1.21	0.15	0.1
686AM62	54.8	70.6	8723	419	152	3109	46.8	39.3	44	90.75	14.68	56.19	8.4	38.05	9.07	1.95	8.2	1.21	7.4	1.54	4.54	0.64	4.03	0.64	2.12	1.33	0.15	0.13
686AM71	45.8	64	7071	403	161	3218	32.5	36.4	31.8	46.19	15.16	57.3	8.31	36.58	9.06	1.91	8.02	1.13	7.04	1.47	4.05	0.57	3.77	0.51	1.64	3.33	0.17	0.09
686AM72	62.9	73.9	9359	395	763	3123	51.4	39.5	52.6	72.75	16.55	55.57	8.05	35.62	8.55	2.23	7.71	1.13	7.42	1.48	4.5	0.67	4.49	0.66	2.34	1.44	0.15	0.14
686AM73	110.3	77.7	13842	402	401	3380	108.1	38.8	60	109.18	13.66	44.29	6.71	30.97	8.68	2.19	7.94	1.17	7.81	1.46	4.31	0.64	4.13	0.64	2.53	1.8	0.19	0.14
686AM81	56.2	107.8	11994	541	94	3015	65.6	62.6	57.7	149.93	14.93	60.2	10.25	51.03	15.27	2.33	13.9	2.07	12.72	2.52	7.19	0.91	6.14	0.84	2.81	2.04	0.16	0.17
686AM82	36.6	57.1	7688	393	142	3126	38.4	33.6	34.9	51.8	13.54	51.01	7.47	31.87	7.82	1.86	7.21	1.01	6.39	1.24	3.75	0.54	3.74	0.53	1.59	2.48	0.16	0.1
686AM83	69.4	119.1	14476	722	125	3090	79.8	63.3	53.7	225.89	14.03	56.12	9.39	48.94	14.78	2.4	14.92	2.1	12.78	2.57	7.06	0.86	5.63	0.76	2.99	1.72	0.13	0.09
681BAM11	33.8	54.3	6896	314	102	3195	38.6	36.7	53.3	53.97	14.66	55.09	8.09	35.64	8.28	1.96	7.32	1.06	7.06	1.41	4	0.63	4.16	0.57	2.41	0.94	0.12	0.07
681BAM12	50.1	84.2	10889	474	109	2942	50.1	55.5	50.1	134.85	18.37	69	11.18	53.23	13.24	2.19	12.2	1.82	11.01	2.13	6.11	0.87	5.48	0.79	2.54	1.12	0.17	0.07
681BAM13	792.1	62.1	7360	360	111	3268	37.2	40.5	33.6	47.37	19.48	63.93	9.08	40.23	9.73	2.08	9.02	1.24	8.05	1.58	4.58	0.6	4.53	0.58	1.83	0.99	0.51	0.23
681BAM21	37.6	7.7	2078	60	182	3362	13.5	15.6	11.9	7.38	7.27	26.48	3.81	16.49	3.68	0.92	3.08	0.43	2.61	0.53	1.71	0.27	1.92	0.27	0.48	0.47	0.03	0.02
681BAM22	62.5	45.5	6511	228	812	3465	53.5	22.6	52.9	45.64	8.52	32.29	4.98	21.47	4.77	1.4	3.95	0.65	3.98	0.85	2.36	0.41	2.72	0.45	2.07	0.71	0.09	0.06
681BAM23	37.7	17.7	3525	119	230	3379	20	24	18	18.04	10.38	38.39	5.57	24.26	5.71	1.31	5.09	0.72	4.68	0.91	2.56	0.39	2.47	0.37	0.81	0.66	0.06	0.06
681BAM31	44.6	51.2	6548	326	126	3056	31	32.3	39.3	48.7	14.31	50.97	7.33	31.59	7.39	1.84	6.95	0.99	6.15	1.18	3.67	0.53	3.65	0.52	1.77	1.4	0.29	0.27
681BAM32	45.9	47.8	6566	322	126	3309	36.1	29.5	35	43.55	12.28	45	6.55	28.35	7.09	1.68	6.06	0.91	5.78	1.16	3.38	0.51	3.31	0.48	1.49	1.01	0.1	0.04
681BAM33	38.9	52.5	6758	341	85	3425	34.3	33.8	32.9	45.79	14.05	51.66	7.63	34.09	7.79	1.83	6.85	1.08	6.75	1.27	3.75	0.56	3.57	0.51	1.69	1.19	0.16	0.05
681BAM41	46.8	77.1	4601	391	141	2655	16.4	35	17.1	19.66	17.17	57.69	8.68	38.43	8.57	1.98	7.75	1.07	6.92	1.35	3.97	0.55	3.69	0.51	1.51	1.28	0.15	0.07
681BAM42	56.7	68.2	8597	448	114	3223	42.9	35.8	45.1	52.15	15.66	53.07	8.02	35.71	8.15	2.03	7.56	1.05	6.64	1.34	4.08	0.6	4.37	0.63	2.1	1.2	0.2	0.07
681BAM43	67.2	74.7	9189	541	174	3008	47.7	30.3	48.6	128.21	16.44	52.71	7.37	31.21	7.46	2.13	6.62	0.92	5.88	1.13	3.42	0.53	3.43	0.55	2.08	1.48	0.24	0.15
681BAM52	50.3	99.8	10314	477	37	2453	48.6	65.2	51.3	120.3	19.42	78.93	12.83	61.63	15.99	2.45	14.66	2.13	13.33	2.46	7.52	1.06	6.71	0.9	2.58	1.2	0.11	0.04
681BAM53	47	92.6	10108	553	112	2715	52.1	60.9	48.1	119.31	19.36	74.51	11.76	55.38	14.49	2.36	12.84	1.96	12.54	2.33	7.04	0.93	6.13	0.82	2.4	1.57	0.2	0.07
681BAM54	69.9	67.6	7010	461	160	2929	44.2	33.3	40.7	130.1	17.26	56.51	7.94	35.13	7.45	2.25	6.63	1.01	6.2	1.23	3.93	0.61	4.2	0.58	2.16	1.39	0.21	0.12
681BAM61	54.6	92.9	11587	536	127	2347	61.7	60.6	57	160.9	18.07	71.91	11.95	57.98	14.71	2.5	13.23	1.9	11.66	2.36	6.65	0.94	6.1	0.87	2.7	1.27	0.18	0.06
681BAM62	55.4	104.2	12252	608	98	3047	65.2	61.9	55.4	204.73	15.73	61.3	10.87	56.11	15.54	2.17	15.43	2.19	13.63	2.47	6.69	0.89	5.25	0.68	2.74	1.61	0.13	0.08
681BAM63	74.7	68.5	7035	477	192	2771	35.2	32.5	36.5	66.88	15.75	55.42	8.03	35.05	8.11	2.27	7.33	0.96	6.13	1.29	3.46	0.53	3.75	0.5	1.92	1.42	0.17	0.09
681BAM71	62.9	96.9	14005	554	115	2821	78.3	63.6	83.5	180.46	18.01	66.75	11.63	58.56	15.36	2.76	14.44	1.98	12.08	2.41	7.29	1.04	6.32	0.91	3.49	1.38	0.14	0.05
681BAM72	55.4	87.5	8743	444	148	2805	38	59.8	44.4	73.43	20.82	75.2	12.46	56.93	13.1	2.3	13.08	1.82	11.78	2.24	6.89	0.94	6.41	0.91	2.43	0.98	0.15	0.05
681BAM81	58.2	71.2	8641	469	215	3305	49.5	31.4	51.9	112.85	16.72	51.34	7.32	31.98	7	1.99	6.53	0.94	6.03	1.23	3.58	0.52	3.92	0.59	2.47	1.35	0.28	0.11
681BAM82	46.3	61.5	7227	439	225	3386	46	29.7	43.3	69.05	14.6	51.07	7.27	30.96	6.59	1.91	5.97	0.87	5.55	1.09	3.54	0.53	3.72	0.57	2.08	1.32	0.2	0.09
681BAM83	48.5	60.4	7709	434	492	2902	37.7	26.8	43	84.36	16.2	53.28	7.19	29.16	6.1	2.05	5.78	0.79	5.26	0.98	3.02	0.47	3.07	0.5	1.98	1.4	0.19	0.09
681BAM84	48.7	62.6	8304	397	262	3065	37.1	29.9	42.6	71.41	13.21	49.96	7.56	34.32	8.84	1.96	7.46	1	6.1	1.12	3.41	0.51	3.34	0.47	1.93	1.26	0.12	0.07
